# Supplementary material for: A Multi-Omics Analysis of Metastatic Melanoma Identifies a Germinal Center-Like Tumor Microenvironment in HLA-DR-Positive Tumor Areas
Source: Front Oncol. 2021 Mar 25;11:636057. doi: 10.3389/fonc.2021.636057 (PMC8029980; doi:10.3389/fonc.2021.636057)
Supplement: Supplementary file 9 [file Table_8.xlsx]

## Sheet: Sheet1
Supplementary Table 8: Complete list of up-and downregulated pathways in HLA-DR+ versus HLA-DR- areas
pathwayID	NGenes	rank.up	rank.down	p_dist_up	p_mix_up	p_non_dir	p_mix_down	p_dist_down
REACTOME_TRANSLATION	291	2199	1	0.99979	0.954483	0.0182503	0.908503	0.000209752
KEGG_RIBOSOME	87	2198	2	0.999173	0.928935	0.0323588	0.948013	0.000827019
REACTOME_SELENOAMINO_ACID_METABOLISM	117	2197	3	0.997345	0.978225	0.0780581	0.976499	0.00265528
REACTOME_SRP_DEPENDENT_COTRANSLATIONAL_PROTEIN_TARGETING_TO_MEMBRANE	111	2196	4	0.997341	0.958904	0.0273696	0.966707	0.00265949
REACTOME_EUKARYOTIC_TRANSLATION_INITIATION	119	2195	5	0.996846	0.985131	0.119387	0.911817	0.00315419
REACTOME_GLUCAGON_SIGNALING_IN_METABOLIC_REGULATION	32	2194	6	0.992884	0.977576	0.108117	0.623591	0.00711595
REACTOME_INFLUENZA_INFECTION	154	2193	7	0.99101	0.968017	0.067456	0.974853	0.00898977
REACTOME_BIOSYNTHESIS_OF_MARESIN_LIKE_SPMS	6	2192	8	0.990997	0.988611	0.155807	0.00586683	0.00900318
REACTOME_NONSENSE_MEDIATED_DECAY_NMD	115	2191	9	0.989677	0.967414	0.149513	0.972576	0.0103234
REACTOME_REGULATION_OF_EXPRESSION_OF_SLITS_AND_ROBOS	168	2190	10	0.989664	0.894694	0.143374	0.977245	0.0103358
REACTOME_METABOLISM_OF_RNA	648	2189	11	0.989654	0.955074	0.015167	0.964652	0.0103457
REACTOME_NONSENSE_MEDIATED_DECAY_NMD_INDEPENDENT_OF_THE_EXON_JUNCTION_COMPLEX_EJC	95	2188	12	0.989263	0.897798	0.152965	0.976416	0.0107366
REACTOME_ACTIVATION_OF_THE_MRNA_UPON_BINDING_OF_THE_CAP_BINDING_COMPLEX_AND_EIFS_AND_SUBSEQUENT_BINDING_TO_43S	60	2187	13	0.989237	0.925611	0.0739925	0.687053	0.0107631
REACTOME_ORGANELLE_BIOGENESIS_AND_MAINTENANCE	270	2186	14	0.988756	0.969252	0.0298554	0.903146	0.011244
REACTOME_THROMBOXANE_SIGNALLING_THROUGH_TP_RECEPTOR	22	2185	15	0.988747	0.938633	0.0817284	0.0861969	0.0112534
REACTOME_COOPERATION_OF_PDCL_PHLP1_AND_TRIC_CCT_IN_G_PROTEIN_BETA_FOLDING	41	2184	16	0.987328	0.889048	0.117135	0.118385	0.0126719
REACTOME_ACTIVATION_OF_KAINATE_RECEPTORS_UPON_GLUTAMATE_BINDING	29	2183	17	0.986528	0.895444	0.0492496	0.0357181	0.013472
REACTOME_PRESYNAPTIC_FUNCTION_OF_KAINATE_RECEPTORS	20	2182	18	0.98641	0.864889	0.0651769	0.00923997	0.0135896
REACTOME_CA2PLUS_PATHWAY	60	2181	19	0.986121	0.944458	0.0605793	0.0738139	0.0138793
KEGG_AMINOACYL_TRNA_BIOSYNTHESIS	41	2180	20	0.98509	0.903827	0.0522595	0.142013	0.0149098
REACTOME_G_ALPHA_Z_SIGNALLING_EVENTS	47	2179	21	0.983851	0.819933	0.0402081	0.130509	0.0161489
REACTOME_NEDDYLATION	229	2178	22	0.980386	0.877901	0.0616365	0.198159	0.0196137
REACTOME_RRNA_PROCESSING_IN_THE_NUCLEUS_AND_CYTOSOL	186	2177	23	0.980051	0.916403	0.0595277	0.932841	0.0199493
REACTOME_PROSTACYCLIN_SIGNALLING_THROUGH_PROSTACYCLIN_RECEPTOR	18	2176	24	0.979863	0.92161	0.125963	0.247715	0.0201367
REACTOME_G_PROTEIN_ACTIVATION	27	2175	25	0.97977	0.852529	0.110198	0.0691037	0.0202302
REACTOME_METABOLISM_OF_AMINO_ACIDS_AND_DERIVATIVES	362	2174	26	0.979408	0.943053	0.00998129	0.905133	0.0205918
PID_HEDGEHOG_GLI_PATHWAY	48	2173	27	0.97867	0.886914	0.0672606	0.641913	0.0213297
REACTOME_CILIUM_ASSEMBLY	197	2172	28	0.978635	0.974949	0.0793061	0.781095	0.0213647
REACTOME_REGULATION_OF_FZD_BY_UBIQUITINATION	21	2171	29	0.978608	0.881708	0.13267	0.399187	0.0213919
REACTOME_MRNA_SPLICING	183	2170	30	0.97703	0.969091	0.0429433	0.955001	0.0229697
REACTOME_SIGNALING_BY_HEDGEHOG	148	2169	31	0.977016	0.970871	0.0545724	0.885701	0.0229842
REACTOME_VXPX_CARGO_TARGETING_TO_CILIUM	21	2168	32	0.976942	0.919775	0.198469	0.101188	0.0230581
REACTOME_PROTEIN_FOLDING	101	2167	33	0.976346	0.888852	0.0323606	0.113294	0.0236536
REACTOME_MITOCHONDRIAL_TRANSLATION	94	2166	34	0.975412	0.909083	0.100276	0.819475	0.0245878
REACTOME_RRNA_PROCESSING	195	2165	35	0.974905	0.905422	0.0559992	0.938903	0.0250949
REACTOME_SYNTHESIS_OF_IP3_AND_IP4_IN_THE_CYTOSOL	26	2164	36	0.974728	0.716451	0.063687	0.224224	0.0252719
REACTOME_XENOBIOTICS	24	2163	37	0.974699	0.499789	0.0972933	0.0220601	0.0253014
REACTOME_INTEGRATION_OF_ENERGY_METABOLISM	107	2162	38	0.974187	0.826688	0.0285545	0.756529	0.0258128
REACTOME_SIGNALING_BY_ROBO_RECEPTORS	213	2161	39	0.973877	0.924888	0.0863061	0.965602	0.0261228
BIOCARTA_MTA3_PATHWAY	17	2160	40	0.972839	0.582197	0.0871646	0.51271	0.0271605
REACTOME_CALNEXIN_CALRETICULIN_CYCLE	26	2159	41	0.972668	0.882105	0.155912	0.506443	0.0273323
PID_THROMBIN_PAR1_PATHWAY	42	2158	42	0.972635	0.744985	0.0231489	0.436884	0.0273645
KEGG_GLYCOSAMINOGLYCAN_BIOSYNTHESIS_KERATAN_SULFATE	14	2157	43	0.97248	0.951377	0.143513	0.153575	0.0275201
PID_WNT_CANONICAL_PATHWAY	20	2156	44	0.970824	0.613703	0.0877116	0.148799	0.0291757
REACTOME_ASPARAGINE_N_LINKED_GLYCOSYLATION	302	2155	45	0.970512	0.798147	0.0170764	0.585225	0.029488
PID_MTOR_4PATHWAY	69	2154	46	0.96903	0.909029	0.0264131	0.265042	0.0309702
REACTOME_IRE1ALPHA_ACTIVATES_CHAPERONES	48	2153	47	0.967499	0.923167	0.0885033	0.605773	0.0325014
REACTOME_CARGO_TRAFFICKING_TO_THE_PERICILIARY_MEMBRANE	51	2152	48	0.966882	0.906145	0.102382	0.31144	0.0331181
KEGG_BIOSYNTHESIS_OF_UNSATURATED_FATTY_ACIDS	20	2151	49	0.966776	0.877768	0.139618	0.498228	0.0332239
REACTOME_MITOTIC_SPINDLE_CHECKPOINT	105	2150	50	0.965076	0.957861	0.0939766	0.659043	0.0349236
REACTOME_G_ALPHA_12_13_SIGNALLING_EVENTS	79	2148	51	0.964785	0.965696	0.0998484	0.716106	0.0352149
REACTOME_PROCESSING_OF_CAPPED_INTRON_CONTAINING_PRE_MRNA	236	2149	52	0.964785	0.974472	0.0331652	0.950855	0.0352149
REACTOME_ADRENALINE_NORADRENALINE_INHIBITS_INSULIN_SECRETION	27	2147	53	0.964583	0.972334	0.0905187	0.0447605	0.0354173
REACTOME_ADP_SIGNALLING_THROUGH_P2Y_PURINOCEPTOR_12	21	2146	54	0.963997	0.847417	0.0955886	0.0492835	0.0360026
REACTOME_REGULATION_OF_CHOLESTEROL_BIOSYNTHESIS_BY_SREBP_SREBF	55	2145	55	0.962877	0.663392	0.0679439	0.75507	0.0371233
REACTOME_TRNA_AMINOACYLATION	42	2144	56	0.960864	0.860244	0.0365836	0.131811	0.0391359
KEGG_UBIQUITIN_MEDIATED_PROTEOLYSIS	130	2143	57	0.960014	0.807756	0.00209688	0.594516	0.0399865
REACTOME_INSULIN_PROCESSING	24	2142	58	0.959672	0.919898	0.178297	0.332889	0.0403278
REACTOME_REGULATION_OF_INSULIN_SECRETION	77	2141	59	0.958685	0.874583	0.031298	0.455932	0.0413154
REACTOME_CYTOSOLIC_SULFONATION_OF_SMALL_MOLECULES	24	2140	60	0.958203	0.507825	0.0739751	0.347421	0.0417972
REACTOME_G_ALPHA_S_SIGNALLING_EVENTS	527	2139	61	0.956889	0.964939	0.973268	0.594066	0.0431112
REACTOME_ACTIVATION_OF_GENE_EXPRESSION_BY_SREBF_SREBP	42	2138	62	0.956617	0.626351	0.0809764	0.745604	0.0433831
KEGG_INOSITOL_PHOSPHATE_METABOLISM	54	2137	63	0.955493	0.490916	0.0179901	0.40239	0.0445067
REACTOME_N_GLYCAN_TRIMMING_IN_THE_ER_AND_CALNEXIN_CALRETICULIN_CYCLE	35	2136	64	0.954855	0.935685	0.180439	0.817473	0.0451449
KEGG_RIBOFLAVIN_METABOLISM	15	2135	65	0.954775	0.924378	0.204341	0.637147	0.0452254
REACTOME_GLUCAGON_TYPE_LIGAND_RECEPTORS	32	2134	66	0.95304	0.907244	0.237478	0.579776	0.0469604
REACTOME_G_BETA:GAMMA_SIGNALLING_THROUGH_PI3KGAMMA	24	2133	67	0.952932	0.574388	0.0323954	0.0127274	0.0470676
REACTOME_AKT_PHOSPHORYLATES_TARGETS_IN_THE_CYTOSOL	14	2132	68	0.95177	0.915634	0.177855	0.374707	0.0482304
REACTOME_FORMATION_OF_TC_NER_PRE_INCISION_COMPLEX	53	2131	69	0.950434	0.953376	0.112425	0.470042	0.0495657
PID_LYSOPHOSPHOLIPID_PATHWAY	64	2130	70	0.948973	0.749492	0.00465612	0.0976562	0.0510272
REACTOME_HEDGEHOG_OFF_STATE	112	2129	71	0.947869	0.889336	0.100391	0.808705	0.0521312
REACTOME_COPI_DEPENDENT_GOLGI_TO_ER_RETROGRADE_TRAFFIC	98	2128	72	0.947677	0.886976	0.0915432	0.537764	0.0523229
REACTOME_METABOLISM_OF_INGESTED_SEMET_SEC_MESEC_INTO_H2SE	8	2127	73	0.947196	0.835373	0.171805	0.358651	0.0528042
REACTOME_RNF_MUTANTS_SHOW_ENHANCED_WNT_SIGNALING_AND_PROLIFERATION	8	2126	74	0.94705	0.975619	0.267162	0.607704	0.0529499
REACTOME_INCRETIN_SYNTHESIS_SECRETION_AND_INACTIVATION	23	2125	75	0.946488	0.971774	0.351847	0.534467	0.0535118
REACTOME_RA_BIOSYNTHESIS_PATHWAY	22	2124	76	0.946319	0.93027	0.121079	0.202394	0.0536809
REACTOME_MITOTIC_PROMETAPHASE	191	2123	77	0.946222	0.942345	0.0525427	0.920463	0.0537781
REACTOME_SMAC_XIAP_REGULATED_APOPTOTIC_RESPONSE	8	2122	78	0.946137	0.538831	0.169165	0.412922	0.0538634
REACTOME_ANTIGEN_PROCESSING:_UBIQUITINATION_PROTEASOME_DEGRADATION	299	2121	79	0.944716	0.761315	0.0650588	0.15019	0.0552841
REACTOME_G_BETA:GAMMA_SIGNALLING_THROUGH_CDC42	19	2120	80	0.94424	0.825425	0.115135	0.0503262	0.0557599
PID_DNA_PK_PATHWAY	16	2119	81	0.94336	0.855625	0.218685	0.159842	0.0566403
REACTOME_ER_QUALITY_CONTROL_COMPARTMENT_ERQC	21	2118	82	0.943079	0.879047	0.156956	0.35414	0.0569207
REACTOME_PROTEIN_LOCALIZATION	160	2117	83	0.939653	0.940462	0.0702338	0.247465	0.0603465
REACTOME_PROCESSING_OF_CAPPED_INTRONLESS_PRE_MRNA	28	2116	84	0.938449	0.927644	0.156585	0.426556	0.0615511
REACTOME_SUMOYLATION_OF_TRANSCRIPTION_COFACTORS	42	2115	85	0.93741	0.946486	0.206319	0.811365	0.06259
REACTOME_KERATAN_SULFATE_KERATIN_METABOLISM	33	2114	86	0.935385	0.891799	0.1007	0.353229	0.0646151
REACTOME_CONSTITUTIVE_SIGNALING_BY_AKT1_E17K_IN_CANCER	26	2113	87	0.934781	0.618626	0.113694	0.526802	0.0652192
REACTOME_SYNTHESIS_OF_PE	12	2112	88	0.934707	0.758851	0.239038	0.663605	0.0652929
REACTOME_OPIOID_SIGNALLING	86	2111	89	0.933105	0.831931	0.0196055	0.742666	0.0668951
REACTOME_UNFOLDED_PROTEIN_RESPONSE_UPR	88	2110	90	0.933025	0.784572	0.0660995	0.791088	0.0669751
REACTOME_DEFECTS_IN_VITAMIN_AND_COFACTOR_METABOLISM	20	2109	91	0.931736	0.818142	0.20617	0.60473	0.0682636
REACTOME_ACETYLCHOLINE_REGULATES_INSULIN_SECRETION	10	2108	92	0.931402	0.605652	0.118103	0.153479	0.0685982
REACTOME_BETA_OXIDATION_OF_BUTANOYL_COA_TO_ACETYL_COA	4	2107	93	0.931268	0.496043	0.22922	0.469442	0.0687318
BIOCARTA_ERAD_PATHWAY	19	2106	94	0.930863	0.916807	0.164848	0.337903	0.069137
REACTOME_CHOLINE_CATABOLISM	6	2105	95	0.92885	0.222224	0.285492	0.741968	0.0711501
REACTOME_ACTIVATION_OF_RAC1_DOWNSTREAM_OF_NMDARS	7	2104	96	0.928779	0.946963	0.256836	0.416709	0.0712207
REACTOME_BBSOME_MEDIATED_CARGO_TARGETING_TO_CILIUM	23	2103	97	0.928718	0.740812	0.106744	0.262405	0.0712817
REACTOME_AQUAPORIN_MEDIATED_TRANSPORT	51	2102	98	0.928498	0.400283	0.0303214	0.594892	0.0715016
REACTOME_MITOCHONDRIAL_PROTEIN_IMPORT	61	2101	99	0.928461	0.922217	0.0909276	0.52166	0.0715393
REACTOME_DEFECTS_IN_BIOTIN_BTN_METABOLISM	8	2100	100	0.928068	0.889712	0.251353	0.685389	0.0719325
BIOCARTA_DICER_PATHWAY	5	2099	101	0.927876	0.348916	0.22917	0.608049	0.0721241
REACTOME_REGULATION_OF_SIGNALING_BY_NODAL	11	2098	102	0.927442	0.326559	0.475153	0.645644	0.0725579
REACTOME_VASOPRESSIN_REGULATES_RENAL_WATER_HOMEOSTASIS_VIA_AQUAPORINS	42	2097	103	0.927291	0.618282	0.041719	0.629112	0.0727085
REACTOME_BETA_CATENIN_INDEPENDENT_WNT_SIGNALING	143	2096	104	0.927139	0.945573	0.0438972	0.297259	0.0728612
KEGG_HUNTINGTONS_DISEASE	166	2095	105	0.926925	0.916664	0.0193292	0.823509	0.0730751
REACTOME_MITOCHONDRIAL_TRNA_AMINOACYLATION	21	2094	106	0.926342	0.842767	0.0780312	0.145949	0.0736578
REACTOME_SYNTHESIS_OF_DIPHTHAMIDE_EEF2	8	2093	107	0.926222	0.873163	0.232157	0.600174	0.0737781
REACTOME_FATTY_ACIDS_BOUND_TO_GPR40_FFAR1_REGULATE_INSULIN_SECRETION	8	2092	108	0.926055	0.697034	0.165784	0.144053	0.0739451
BIOCARTA_BOTULIN_PATHWAY	5	2091	109	0.925247	0.823575	0.11738	0.0497087	0.0747528
REACTOME_ANCHORING_OF_THE_BASAL_BODY_TO_THE_PLASMA_MEMBRANE	94	2090	110	0.924522	0.951739	0.100968	0.879657	0.0754775
PID_AURORA_B_PATHWAY	37	2089	111	0.924134	0.897263	0.225608	0.878639	0.0758661
REACTOME_COPII_MEDIATED_VESICLE_TRANSPORT	67	2088	112	0.922248	0.541018	0.0480903	0.527802	0.0777518
REACTOME_CLASS_B_2_SECRETIN_FAMILY_RECEPTORS	89	2087	113	0.921329	0.773272	0.0323086	0.199238	0.0786708
REACTOME_MRNA_SPLICING_MINOR_PATHWAY	50	2086	114	0.921076	0.939648	0.280349	0.931112	0.0789236
REACTOME_G_PROTEIN_BETA:GAMMA_SIGNALLING	31	2085	115	0.920486	0.571445	0.0325578	0.0045657	0.0795143
REACTOME_BETA_OXIDATION_OF_HEXANOYL_COA_TO_BUTANOYL_COA	5	2084	116	0.920259	0.326546	0.264927	0.633169	0.079741
REACTOME_PROCESSING_OF_INTRONLESS_PRE_MRNAS	19	2083	117	0.918537	0.810423	0.177822	0.496362	0.0814633
REACTOME_THROMBIN_SIGNALLING_THROUGH_PROTEINASE_ACTIVATED_RECEPTORS_PARS	31	2082	118	0.918422	0.919144	0.0714901	0.172164	0.0815784
REACTOME_MITOTIC_METAPHASE_AND_ANAPHASE	194	2081	119	0.918161	0.926729	0.0571661	0.782857	0.0818391
REACTOME_GLYCOSAMINOGLYCAN_METABOLISM	122	2080	120	0.917783	0.849937	0.0191945	0.950642	0.0822166
KEGG_PROGESTERONE_MEDIATED_OOCYTE_MATURATION	85	2079	121	0.916761	0.829513	0.0219988	0.489514	0.0832393
KEGG_GLYCOSPHINGOLIPID_BIOSYNTHESIS_GANGLIO_SERIES	15	2078	122	0.916731	0.816034	0.153902	0.55397	0.0832691
REACTOME_RESOLUTION_OF_SISTER_CHROMATID_COHESION	119	2077	123	0.916336	0.927934	0.0760896	0.709036	0.0836643
REACTOME_NUCLEOTIDE_EXCISION_REPAIR	110	2076	124	0.916072	0.926745	0.0531935	0.795631	0.0839282
KEGG_OOCYTE_MEIOSIS	111	2075	125	0.915746	0.927822	0.0792003	0.749618	0.0842538
REACTOME_ER_TO_GOLGI_ANTEROGRADE_TRANSPORT	153	2074	126	0.915319	0.840106	0.0424155	0.428015	0.0846811
REACTOME_SIGNALING_BY_FGFR	86	2073	127	0.915242	0.824995	0.0670906	0.889153	0.0847578
REACTOME_DISEASES_OF_GLYCOSYLATION	140	2072	128	0.914544	0.534367	0.00394011	0.680057	0.0854563
REACTOME_WAX_AND_PLASMALOGEN_BIOSYNTHESIS	7	2071	129	0.914503	0.894912	0.24188	0.332992	0.0854974
KEGG_METABOLISM_OF_XENOBIOTICS_BY_CYTOCHROME_P450	70	2070	130	0.91395	0.616542	0.203656	0.214358	0.0860498
REACTOME_BRANCHED_CHAIN_AMINO_ACID_CATABOLISM	19	2069	131	0.913845	0.891141	0.229958	0.760064	0.0861551
REACTOME_BETA_OXIDATION_OF_OCTANOYL_COA_TO_HEXANOYL_COA	5	2068	132	0.913817	0.301854	0.268141	0.654819	0.0861833
REACTOME_MICRORNA_MIRNA_BIOGENESIS	25	2067	133	0.913716	0.9105	0.279873	0.575184	0.0862839
REACTOME_SEROTONIN_NEUROTRANSMITTER_RELEASE_CYCLE	17	2066	134	0.913339	0.584557	0.0788524	0.170084	0.0866614
REACTOME_ERKS_ARE_INACTIVATED	13	2065	135	0.912906	0.737522	0.187271	0.55482	0.0870936
PID_MET_PATHWAY	79	2064	136	0.912866	0.823323	0.0101833	0.430016	0.0871342
REACTOME_SYNTHESIS_OF_PIPS_AT_THE_EARLY_ENDOSOME_MEMBRANE	16	2063	137	0.912819	0.685027	0.0691989	0.263379	0.0871809
REACTOME_DOWNREGULATION_OF_ERBB2:ERBB3_SIGNALING	13	2062	138	0.912791	0.812826	0.188197	0.484455	0.0872093
REACTOME_DOWNREGULATION_OF_ERBB2_SIGNALING	27	2060	139	0.912033	0.480133	0.0857581	0.626477	0.0879673
REACTOME_SIGNALING_BY_WNT_IN_CANCER	34	2061	140	0.912033	0.892072	0.275209	0.885591	0.0879673
REACTOME_ACETYLCHOLINE_NEUROTRANSMITTER_RELEASE_CYCLE	16	2059	141	0.91122	0.561673	0.108275	0.175371	0.0887801
REACTOME_FOXO_MEDIATED_TRANSCRIPTION_OF_OXIDATIVE_STRESS_METABOLIC_AND_NEURONAL_GENES	30	2058	142	0.910498	0.518854	0.0982345	0.670065	0.0895024
REACTOME_KERATAN_SULFATE_BIOSYNTHESIS	27	2057	143	0.910292	0.766959	0.118402	0.422147	0.0897079
REACTOME_MRNA_CAPPING	29	2056	144	0.909939	0.908236	0.121822	0.393959	0.0900612
REACTOME_HEME_BIOSYNTHESIS	11	2055	145	0.909633	0.623426	0.253993	0.595351	0.0903666
REACTOME_ACETYLCHOLINE_BINDING_AND_DOWNSTREAM_EVENTS	14	2054	146	0.909586	0.910687	0.280099	0.125541	0.0904142
KEGG_SNARE_INTERACTIONS_IN_VESICULAR_TRANSPORT	38	2053	147	0.909326	0.790711	0.130714	0.654666	0.0906738
BIOCARTA_PARKIN_PATHWAY	8	2052	148	0.909297	0.914538	0.226043	0.343852	0.0907032
REACTOME_FGFR2_ALTERNATIVE_SPLICING	27	2051	149	0.908625	0.915844	0.25463	0.703959	0.0913753
REACTOME_INFECTIOUS_DISEASE	372	2050	150	0.908521	0.848427	0.0473373	0.957358	0.0914795
REACTOME_SIGNALING_BY_FGFR2	73	2049	151	0.908035	0.842635	0.11643	0.840322	0.0919645
REACTOME_METABOLISM_OF_CARBOHYDRATES	287	2048	152	0.90723	0.761793	0.0309372	0.941895	0.09277
KEGG_GLYCOSAMINOGLYCAN_BIOSYNTHESIS_HEPARAN_SULFATE	26	2047	153	0.90671	0.368984	0.0779597	0.690104	0.0932896
REACTOME_GOLGI_ASSOCIATED_VESICLE_BIOGENESIS	56	2046	154	0.905701	0.865377	0.054679	0.378151	0.0942986
REACTOME_FREE_FATTY_ACID_RECEPTORS	5	2045	155	0.905615	0.592015	0.472887	0.379876	0.0943851
REACTOME_SULFUR_AMINO_ACID_METABOLISM	26	2044	156	0.905599	0.832166	0.132345	0.852345	0.0944012
REACTOME_BIOTIN_TRANSPORT_AND_METABOLISM	11	2043	157	0.905517	0.927435	0.254587	0.706198	0.0944833
REACTOME_PTEN_REGULATION	137	2042	158	0.904664	0.890441	0.0834943	0.779497	0.0953363
REACTOME_SIGNALING_BY_RETINOIC_ACID	43	2041	159	0.904604	0.888791	0.081565	0.270171	0.0953956
REACTOME_DISEASES_ASSOCIATED_WITH_GLYCOSAMINOGLYCAN_METABOLISM	41	2040	160	0.904461	0.516235	0.0388071	0.74408	0.0955391
REACTOME_COMMON_PATHWAY_OF_FIBRIN_CLOT_FORMATION	22	2039	161	0.904314	0.4786	0.0459362	0.030141	0.0956864
KEGG_GLYCOSYLPHOSPHATIDYLINOSITOL_GPI_ANCHOR_BIOSYNTHESIS	25	2038	162	0.903978	0.765733	0.0451682	0.0137351	0.0960222
REACTOME_SMALL_INTERFERING_RNA_SIRNA_BIOGENESIS	9	2037	163	0.903782	0.88853	0.291949	0.638019	0.0962177
REACTOME_MITOCHONDRIAL_BIOGENESIS	73	2036	164	0.903095	0.716382	0.0436382	0.88612	0.0969048
REACTOME_FOXO_MEDIATED_TRANSCRIPTION	66	2035	165	0.902904	0.415043	0.0194452	0.823893	0.0970965
REACTOME_RHO_GTPASES_ACTIVATE_FORMINS	133	2034	166	0.902528	0.914981	0.0977576	0.633582	0.0974719
REACTOME_NUCLEOBASE_BIOSYNTHESIS	15	2033	167	0.902335	0.70586	0.169803	0.42554	0.0976648
REACTOME_BETA_OXIDATION_OF_DECANOYL_COA_TO_OCTANOYL_COA_COA	6	2032	168	0.90224	0.181052	0.301856	0.767232	0.0977595
BIOCARTA_S1P_PATHWAY	8	2031	169	0.901942	0.111897	0.281173	0.830428	0.0980581
REACTOME_CYP2E1_REACTIONS	11	2030	170	0.901354	0.207504	0.116928	0.0115258	0.098646
REACTOME_RUNX1_INTERACTS_WITH_CO_FACTORS_WHOSE_PRECISE_EFFECT_ON_RUNX1_TARGETS_IS_NOT_KNOWN	37	2029	171	0.901113	0.704313	0.151123	0.882422	0.0988872
REACTOME_APEX1_INDEPENDENT_RESOLUTION_OF_AP_SITES_VIA_THE_SINGLE_NUCLEOTIDE_REPLACEMENT_PATHWAY	7	2028	172	0.901036	0.810667	0.255034	0.555849	0.098964
KEGG_CYSTEINE_AND_METHIONINE_METABOLISM	34	2027	173	0.900615	0.872937	0.0680275	0.688825	0.0993848
REACTOME_COENZYME_A_BIOSYNTHESIS	8	2026	174	0.900582	0.886989	0.22355	0.395326	0.0994175
BIOCARTA_EEA1_PATHWAY	7	2025	175	0.900067	0.715367	0.278245	0.639142	0.0999325
REACTOME_CELLULAR_RESPONSE_TO_HEAT_STRESS	98	2024	176	0.899936	0.831949	0.0623085	0.815465	0.100064
KEGG_PROTEIN_EXPORT	23	2023	177	0.899686	0.759886	0.10997	0.451434	0.100314
REACTOME_RNA_POLYMERASE_III_TRANSCRIPTION_INITIATION_FROM_TYPE_1_PROMOTER	28	2022	178	0.899362	0.78022	0.137348	0.786041	0.100638
REACTOME_NEGATIVE_REGULATION_OF_ACTIVITY_OF_TFAP2_AP_2_FAMILY_TRANSCRIPTION_FACTORS	10	2021	179	0.899287	0.907725	0.197817	0.380678	0.100713
REACTOME_HIGHLY_CALCIUM_PERMEABLE_POSTSYNAPTIC_NICOTINIC_ACETYLCHOLINE_RECEPTORS	11	2020	180	0.899042	0.851254	0.25045	0.116015	0.100958
REACTOME_DISEASES_OF_METABOLISM	101	2019	181	0.898815	0.58047	0.0440093	0.769044	0.101185
BIOCARTA_EXTRINSIC_PATHWAY	13	2018	182	0.898555	0.740833	0.00566758	0.135333	0.101445
REACTOME_RUNX2_REGULATES_CHONDROCYTE_MATURATION	5	2017	183	0.897814	0.899573	0.238054	0.207067	0.102186
REACTOME_SIGNALING_BY_NODAL	20	2016	184	0.897699	0.558228	0.50761	0.865474	0.102301
REACTOME_CENTROSOME_MATURATION	80	2015	185	0.897583	0.941703	0.162274	0.922987	0.102417
REACTOME_ABC_TRANSPORTERS_IN_LIPID_HOMEOSTASIS	18	2014	186	0.897447	0.157866	0.00295156	0.0876897	0.102553
REACTOME_ROLE_OF_ABL_IN_ROBO_SLIT_SIGNALING	8	2013	187	0.896916	0.743549	0.28146	0.822034	0.103084
REACTOME_SIGNALING_BY_ERBB2	48	2012	188	0.896428	0.580133	0.0541206	0.836499	0.103572
REACTOME_GLYCOGEN_METABOLISM	27	2011	189	0.896379	0.890524	0.249674	0.909768	0.103621
REACTOME_SIGNALING_BY_HIPPO	20	2010	190	0.895621	0.884477	0.190099	0.703463	0.104379
BIOCARTA_NDKDYNAMIN_PATHWAY	17	2009	191	0.895318	0.844035	0.186343	0.31238	0.104682
REACTOME_MUSCARINIC_ACETYLCHOLINE_RECEPTORS	5	2008	192	0.895146	0.418956	0.393601	0.549824	0.104854
REACTOME_TRANSCRIPTION_COUPLED_NUCLEOTIDE_EXCISION_REPAIR_TC_NER	78	2007	193	0.894613	0.935968	0.0940966	0.441914	0.105387
KEGG_ENDOMETRIAL_CANCER	52	2006	194	0.894149	0.866053	0.104969	0.88066	0.105851
REACTOME_HEPARAN_SULFATE_HEPARIN_HS_GAG_METABOLISM	55	2005	195	0.893566	0.512447	0.0415324	0.861094	0.106434
REACTOME_REGULATION_OF_LOCALIZATION_OF_FOXO_TRANSCRIPTION_FACTORS	12	2004	196	0.893486	0.945896	0.240983	0.393208	0.106514
REACTOME_ASSOCIATION_OF_TRIC_CCT_WITH_TARGET_PROTEINS_DURING_BIOSYNTHESIS	39	2003	197	0.892992	0.753131	0.100054	0.731021	0.107008
BIOCARTA_TERC_PATHWAY	6	2002	198	0.892957	0.50509	0.177677	0.20496	0.107043
REACTOME_CYTOSOLIC_TRNA_AMINOACYLATION	24	2001	199	0.89227	0.725606	0.12264	0.619984	0.10773
SA_PTEN_PATHWAY	17	2000	200	0.8913	0.776786	0.138452	0.826376	0.1087
KEGG_VALINE_LEUCINE_AND_ISOLEUCINE_DEGRADATION	43	1999	201	0.890951	0.725721	0.0857216	0.860422	0.109049
REACTOME_SIGNALING_BY_FGFR2_IIIA_TM	19	1998	202	0.887529	0.891725	0.276618	0.75236	0.112471
KEGG_BASAL_TRANSCRIPTION_FACTORS	35	1997	203	0.886405	0.702594	0.129821	0.707606	0.113595
REACTOME_DAG_AND_IP3_SIGNALING	39	1996	204	0.885609	0.849728	0.126243	0.753791	0.114391
REACTOME_INTRA_GOLGI_AND_RETROGRADE_GOLGI_TO_ER_TRAFFIC	200	1995	205	0.88515	0.894862	0.0532504	0.668186	0.11485
REACTOME_HS_GAG_DEGRADATION	22	1994	206	0.884224	0.79933	0.118294	0.617118	0.115776
REACTOME_DISEASES_ASSOCIATED_WITH_GLYCOSYLATION_PRECURSOR_BIOSYNTHESIS	18	1993	207	0.883796	0.846719	0.169481	0.745933	0.116204
REACTOME_PKA_ACTIVATION_IN_GLUCAGON_SIGNALLING	17	1992	208	0.883219	0.886236	0.22614	0.782676	0.116781
REACTOME_DEFECTIVE_EXT2_CAUSES_EXOSTOSES_2	14	1991	209	0.88318	0.57974	0.0710516	0.512664	0.11682
REACTOME_WNT_MEDIATED_ACTIVATION_OF_DVL	8	1990	210	0.882761	0.762377	0.223618	0.464074	0.117239
PID_HDAC_CLASSII_PATHWAY	33	1989	211	0.882302	0.891412	0.145487	0.978854	0.117698
REACTOME_RAB_REGULATION_OF_TRAFFICKING	120	1988	212	0.88199	0.887482	0.106737	0.790705	0.11801
REACTOME_RNA_POLYMERASE_II_PRE_TRANSCRIPTION_EVENTS	77	1987	213	0.881453	0.911123	0.101705	0.56457	0.118547
REACTOME_ADRENOCEPTORS	9	1986	214	0.880674	0.93743	0.404279	0.631935	0.119326
REACTOME_ION_TRANSPORT_BY_P_TYPE_ATPASES	55	1985	215	0.879647	0.927372	0.154094	0.584138	0.120353
PID_HEDGEHOG_2PATHWAY	21	1984	216	0.878709	0.784396	0.0532034	0.130442	0.121291
REACTOME_POST_TRANSCRIPTIONAL_SILENCING_BY_SMALL_RNAS	7	1983	217	0.878674	0.859678	0.276548	0.655932	0.121326
REACTOME_SODIUM_COUPLED_SULPHATE_DI_AND_TRI_CARBOXYLATE_TRANSPORTERS	5	1982	218	0.878388	0.861137	0.305247	0.37253	0.121612
BIOCARTA_CELL2CELL_PATHWAY	11	1981	219	0.877995	0.856711	0.285309	0.791758	0.122005
REACTOME_RNA_POLYMERASE_II_TRANSCRIPTION_PRE_INITIATION_AND_PROMOTER_OPENING	47	1980	220	0.877983	0.91354	0.122533	0.505957	0.122017
REACTOME_RAB_GEFS_EXCHANGE_GTP_FOR_GDP_ON_RABS	88	1979	221	0.877671	0.873327	0.0988049	0.602869	0.122329
KEGG_PARKINSONS_DISEASE	113	1978	222	0.876842	0.899864	0.15727	0.903659	0.123158
REACTOME_SIGNALING_BY_FGFR2_IN_DISEASE	43	1977	223	0.876639	0.79508	0.140236	0.892139	0.123361
REACTOME_RNA_POLYMERASE_II_TRANSCRIPTION_ELONGATION	54	1976	224	0.875511	0.90995	0.125434	0.571261	0.124489
REACTOME_ESTROGEN_STIMULATED_SIGNALING_THROUGH_PRKCZ	6	1975	225	0.874868	0.872797	0.36156	0.64366	0.125132
REACTOME_THE_CITRIC_ACID_TCA_CYCLE_AND_RESPIRATORY_ELECTRON_TRANSPORT	157	1974	226	0.874779	0.908787	0.0592611	0.899439	0.125221
REACTOME_TERMINATION_OF_O_GLYCAN_BIOSYNTHESIS	23	1973	227	0.874404	0.59569	0.255696	0.286687	0.125596
REACTOME_DNA_DAMAGE_RECOGNITION_IN_GG_NER	38	1972	228	0.874295	0.912832	0.260493	0.908199	0.125705
KEGG_PHOSPHATIDYLINOSITOL_SIGNALING_SYSTEM	76	1971	229	0.873818	0.262134	0.000144233	0.353427	0.126182
REACTOME_GABA_SYNTHESIS_RELEASE_REUPTAKE_AND_DEGRADATION	19	1970	230	0.873404	0.444185	0.155096	0.638617	0.126596
REACTOME_AURKA_ACTIVATION_BY_TPX2	71	1969	231	0.873139	0.949317	0.236758	0.926076	0.126861
REACTOME_TRANSCRIPTION_OF_THE_HIV_GENOME	66	1968	232	0.871672	0.896203	0.0669342	0.695367	0.128328
REACTOME_HEDGEHOG_ON_STATE	84	1967	233	0.871353	0.916671	0.0619106	0.760402	0.128647
BIOCARTA_PRION_PATHWAY	12	1966	234	0.8712	0.467124	0.206128	0.769021	0.1288
REACTOME_FORMATION_OF_THE_EARLY_ELONGATION_COMPLEX	33	1965	235	0.871025	0.916097	0.156049	0.615633	0.128975
KEGG_BASE_EXCISION_REPAIR	34	1964	236	0.869782	0.696425	0.0624166	0.401541	0.130218
KEGG_MELANOGENESIS	101	1963	237	0.869038	0.831085	0.0273072	0.579555	0.130962
REACTOME_GLUCAGON_LIKE_PEPTIDE_1_GLP1_REGULATES_INSULIN_SECRETION	41	1962	238	0.867989	0.809086	0.115685	0.827863	0.132011
REACTOME_TRANSCRIPTIONAL_ACTIVATION_OF_MITOCHONDRIAL_BIOGENESIS	51	1961	239	0.867452	0.707761	0.0613575	0.794311	0.132548
REACTOME_THE_CANONICAL_RETINOID_CYCLE_IN_RODS_TWILIGHT_VISION	23	1960	240	0.86722	0.926828	0.171075	0.567164	0.13278
REACTOME_OREXIN_AND_NEUROPEPTIDES_FF_AND_QRFP_BIND_TO_THEIR_RESPECTIVE_RECEPTORS	8	1959	241	0.867089	0.34261	0.923991	0.647237	0.132911
REACTOME_NEGATIVE_FEEDBACK_REGULATION_OF_MAPK_PATHWAY	6	1958	242	0.866508	0.909541	0.260121	0.524708	0.133492
PID_THROMBIN_PAR4_PATHWAY	15	1957	243	0.866027	0.83657	0.15672	0.0731252	0.133973
REACTOME_FGFRL1_MODULATION_OF_FGFR1_SIGNALING	13	1956	244	0.865556	0.67096	0.219952	0.749255	0.134444
REACTOME_PYRUVATE_METABOLISM_AND_CITRIC_ACID_TCA_CYCLE	55	1955	245	0.865477	0.806254	0.0547625	0.459788	0.134523
REACTOME_TRANSCRIPTION_OF_E2F_TARGETS_UNDER_NEGATIVE_CONTROL_BY_P107_RBL1_AND_P130_RBL2_IN_COMPLEX_WITH_HDAC1	16	1954	246	0.865108	0.857826	0.21282	0.739357	0.134892
PID_P53_REGULATION_PATHWAY	56	1953	247	0.864993	0.872592	0.11721	0.792229	0.135007
PID_PI3KCI_AKT_PATHWAY	35	1952	248	0.864951	0.887185	0.222753	0.818724	0.135049
REACTOME_ACTIVATION_OF_SMO	17	1951	249	0.864055	0.690673	0.0689911	0.186439	0.135945
KEGG_FOLATE_BIOSYNTHESIS	10	1950	250	0.863757	0.875714	0.285618	0.183593	0.136243
REACTOME_RETROGRADE_TRANSPORT_AT_THE_TRANS_GOLGI_NETWORK	48	1949	251	0.86354	0.716892	0.111085	0.575669	0.13646
REACTOME_EXTRA_NUCLEAR_ESTROGEN_SIGNALING	74	1948	252	0.862764	0.824724	0.0680884	0.693807	0.137236
REACTOME_FGFR2_MUTANT_RECEPTOR_ACTIVATION	33	1947	253	0.861155	0.861854	0.194374	0.795846	0.138845
REACTOME_SYNTHESIS_SECRETION_AND_INACTIVATION_OF_GLUCOSE_DEPENDENT_INSULINOTROPIC_POLYPEPTIDE_GIP	13	1946	254	0.861104	0.902111	0.409381	0.738363	0.138896
REACTOME_ABORTIVE_ELONGATION_OF_HIV_1_TRANSCRIPT_IN_THE_ABSENCE_OF_TAT	23	1945	255	0.859644	0.89327	0.359632	0.82616	0.140356
BIOCARTA_MALATEX_PATHWAY	8	1944	256	0.858669	0.697689	0.185054	0.242051	0.141331
REACTOME_CHYLOMICRON_CLEARANCE	5	1943	257	0.858561	0.83276	0.299343	0.514126	0.141439
PID_RHOA_REG_PATHWAY	46	1942	258	0.857648	0.93585	0.268547	0.787446	0.142352
REACTOME_NUCLEAR_EVENTS_KINASE_AND_TRANSCRIPTION_FACTOR_ACTIVATION	25	1941	259	0.857542	0.847105	0.173014	0.648348	0.142458
REACTOME_GLUCONEOGENESIS	34	1940	260	0.856734	0.137888	0.0371335	0.608988	0.143266
REACTOME_COPI_MEDIATED_ANTEROGRADE_TRANSPORT	101	1939	261	0.856251	0.875055	0.0874821	0.4481	0.143749
REACTOME_ORGANIC_ANION_TRANSPORTERS	10	1938	262	0.856189	0.863636	0.394789	0.762056	0.143811
REACTOME_CREB1_PHOSPHORYLATION_THROUGH_NMDA_RECEPTOR_MEDIATED_ACTIVATION_OF_RAS_SIGNALING	28	1937	263	0.856177	0.902326	0.214157	0.843126	0.143823
REACTOME_DNA_DAMAGE_REVERSAL	8	1936	264	0.856019	0.902539	0.314115	0.802436	0.143981
REACTOME_GLYCOGEN_BREAKDOWN_GLYCOGENOLYSIS	15	1935	265	0.855403	0.882106	0.20871	0.779699	0.144597
REACTOME_TICAM1_TRAF6_DEPENDENT_INDUCTION_OF_TAK1_COMPLEX	11	1934	266	0.854382	0.905301	0.207197	0.394979	0.145618
REACTOME_REGULATION_OF_PTEN_GENE_TRANSCRIPTION	60	1933	267	0.854142	0.73553	0.0931162	0.514044	0.145858
REACTOME_REGULATION_OF_TP53_ACTIVITY_THROUGH_ACETYLATION	29	1932	268	0.853648	0.875067	0.183089	0.528542	0.146352
KEGG_ADHERENS_JUNCTION	68	1931	269	0.853097	0.917377	0.185117	0.896892	0.146903
REACTOME_REGULATION_OF_RUNX2_EXPRESSION_AND_ACTIVITY	72	1930	270	0.853004	0.815451	0.130213	0.84357	0.146996
REACTOME_SIGNALING_BY_FGFR1	49	1929	271	0.852862	0.431523	0.0482474	0.752244	0.147138
REACTOME_CYTOCHROME_C_MEDIATED_APOPTOTIC_RESPONSE	13	1928	272	0.851725	0.801915	0.22215	0.795906	0.148275
REACTOME_SYNTHESIS_OF_PI	4	1927	273	0.851407	0.356328	0.136455	0.187113	0.148593
REACTOME_CHONDROITIN_SULFATE_DERMATAN_SULFATE_METABOLISM	50	1926	274	0.849677	0.700212	0.0328797	0.755787	0.150323
REACTOME_INOSITOL_PHOSPHATE_METABOLISM	48	1925	275	0.848451	0.642636	0.0582811	0.390628	0.151549
REACTOME_PROTEIN_METHYLATION	12	1924	276	0.84822	0.807582	0.214596	0.583018	0.15178
REACTOME_PURINE_RIBONUCLEOSIDE_MONOPHOSPHATE_BIOSYNTHESIS	12	1923	277	0.848192	0.755178	0.202265	0.652171	0.151808
REACTOME_FGFR1B_LIGAND_BINDING_AND_ACTIVATION	6	1922	278	0.84791	0.809493	0.272593	0.76226	0.15209
KEGG_NON_HOMOLOGOUS_END_JOINING	12	1921	279	0.847464	0.830726	0.251543	0.0849343	0.152536
REACTOME_GALACTOSE_CATABOLISM	5	1920	280	0.847412	0.493508	0.180478	0.411064	0.152588
REACTOME_RECRUITMENT_OF_NUMA_TO_MITOTIC_CENTROSOMES	93	1919	281	0.84662	0.897079	0.14218	0.886301	0.15338
REACTOME_RESPIRATORY_ELECTRON_TRANSPORT	99	1918	282	0.845103	0.895987	0.200581	0.904731	0.154897
REACTOME_ROBO_RECEPTORS_BIND_AKAP5	9	1917	283	0.844468	0.863711	0.308874	0.571678	0.155532
REACTOME_FORMATION_OF_HIV_ELONGATION_COMPLEX_IN_THE_ABSENCE_OF_HIV_TAT	41	1916	284	0.843516	0.901253	0.107285	0.657941	0.156484
REACTOME_APOPTOTIC_FACTOR_MEDIATED_RESPONSE	16	1915	285	0.843414	0.854208	0.185755	0.755008	0.156586
REACTOME_ARYL_HYDROCARBON_RECEPTOR_SIGNALLING	7	1914	286	0.842737	0.782332	0.277751	0.690516	0.157263
REACTOME_METABOLISM_OF_FOLATE_AND_PTERINES	16	1913	287	0.842108	0.899554	0.225496	0.221056	0.157892
REACTOME_SYNTHESIS_OF_SUBSTRATES_IN_N_GLYCAN_BIOSYTHESIS	62	1912	288	0.841748	0.694985	0.0440231	0.823987	0.158252
REACTOME_METABOLISM_OF_FAT_SOLUBLE_VITAMINS	47	1911	289	0.840242	0.723841	0.120566	0.808923	0.159758
REACTOME_HUR_ELAVL1_BINDS_AND_STABILIZES_MRNA	8	1910	290	0.840214	0.577002	0.224708	0.551129	0.159786
REACTOME_MACROAUTOPHAGY	86	1909	291	0.839992	0.770097	0.0619968	0.805501	0.160008
REACTOME_PTK6_REGULATES_PROTEINS_INVOLVED_IN_RNA_PROCESSING	5	1908	292	0.83996	0.877204	0.305254	0.435231	0.16004
REACTOME_COMPETING_ENDOGENOUS_RNAS_CERNAS_REGULATE_PTEN_TRANSLATION	8	1907	293	0.838348	0.847845	0.289924	0.649777	0.161652
REACTOME_DISEASES_OF_MISMATCH_REPAIR_MMR	5	1906	294	0.837153	0.550431	0.25114	0.573174	0.162847
PID_AR_NONGENOMIC_PATHWAY	31	1905	295	0.836749	0.683687	0.0528803	0.317953	0.163251
KEGG_AMINO_SUGAR_AND_NUCLEOTIDE_SUGAR_METABOLISM	43	1904	296	0.836666	0.440538	0.040566	0.437488	0.163334
REACTOME_NRAGE_SIGNALS_DEATH_THROUGH_JNK	59	1903	297	0.836529	0.893704	0.11072	0.835998	0.163471
REACTOME_SIGNALING_BY_EGFRVIII_IN_CANCER	14	1902	298	0.834456	0.599071	0.167815	0.696307	0.165544
REACTOME_A_TETRASACCHARIDE_LINKER_SEQUENCE_IS_REQUIRED_FOR_GAG_SYNTHESIS	26	1901	299	0.834254	0.482677	0.094673	0.805171	0.165746
PID_ECADHERIN_STABILIZATION_PATHWAY	39	1900	300	0.83398	0.73826	0.109329	0.883252	0.16602
REACTOME_SIALIC_ACID_METABOLISM	33	1899	301	0.833967	0.721863	0.102092	0.606283	0.166033
REACTOME_VITAMINS	6	1898	302	0.833289	0.522046	0.0456359	0.0121549	0.166711
REACTOME_VIRAL_MESSENGER_RNA_SYNTHESIS	43	1897	303	0.832032	0.906717	0.223984	0.783477	0.167968
REACTOME_SYNTHESIS_OF_EPOXY_EET_AND_DIHYDROXYEICOSATRIENOIC_ACIDS_DHET	8	1896	304	0.831809	0.35525	0.129492	0.00777549	0.168191
BIOCARTA_CALCINEURIN_PATHWAY	18	1895	305	0.831794	0.697763	0.0652332	0.173594	0.168206
KEGG_MTOR_SIGNALING_PATHWAY	51	1894	306	0.831598	0.77188	0.0658865	0.781597	0.168402
REACTOME_CYTOCHROME_P450_ARRANGED_BY_SUBSTRATE_TYPE	64	1893	307	0.831458	0.330258	0.00472463	0.00107712	0.168542
REACTOME_MYOCLONIC_EPILEPSY_OF_LAFORA	9	1892	308	0.831339	0.676043	0.271919	0.748471	0.168661
REACTOME_GOLGI_TO_ER_RETROGRADE_TRANSPORT	132	1891	309	0.830606	0.863685	0.0769953	0.783372	0.169394
REACTOME_TLR3_MEDIATED_TICAM1_DEPENDENT_PROGRAMMED_CELL_DEATH	6	1890	310	0.830591	0.780344	0.149882	0.0773153	0.169409
REACTOME_PROTEIN_PROTEIN_INTERACTIONS_AT_SYNAPSES	87	1889	311	0.830556	0.836105	0.0389665	0.678265	0.169444
KEGG_PRIMARY_BILE_ACID_BIOSYNTHESIS	16	1888	312	0.830131	0.755458	0.136265	0.0285894	0.169869
REACTOME_NTRK2_ACTIVATES_RAC1	5	1887	313	0.829766	0.918835	0.367624	0.781302	0.170234
REACTOME_BETA_OXIDATION_OF_LAUROYL_COA_TO_DECANOYL_COA_COA	5	1886	314	0.829722	0.593729	0.258026	0.59182	0.170278
REACTOME_SLBP_DEPENDENT_PROCESSING_OF_REPLICATION_DEPENDENT_HISTONE_PRE_MRNAS	11	1885	315	0.829227	0.891253	0.258522	0.540013	0.170773
BIOCARTA_GSK3_PATHWAY	20	1884	316	0.828829	0.754645	0.190521	0.585453	0.171171
REACTOME_MOLYBDENUM_COFACTOR_BIOSYNTHESIS	6	1883	317	0.828399	0.707556	0.304086	0.677225	0.171601
REACTOME_STRIATED_MUSCLE_CONTRACTION	36	1882	318	0.827717	0.736614	0.169932	0.336776	0.172283
REACTOME_REGULATION_OF_TP53_EXPRESSION_AND_DEGRADATION	37	1881	319	0.827677	0.785667	0.118856	0.337407	0.172323
REACTOME_DISASSEMBLY_OF_THE_DESTRUCTION_COMPLEX_AND_RECRUITMENT_OF_AXIN_TO_THE_MEMBRANE	31	1880	320	0.827607	0.701425	0.18853	0.6657	0.172393
BIOCARTA_PGC1A_PATHWAY	15	1879	321	0.82757	0.743949	0.184132	0.626232	0.17243
REACTOME_ACTIVATION_OF_NIMA_KINASES_NEK9_NEK6_NEK7	7	1878	322	0.827521	0.807184	0.253722	0.389413	0.172479
KEGG_N_GLYCAN_BIOSYNTHESIS	46	1877	323	0.826914	0.461375	0.0479358	0.873672	0.173086
KEGG_SPLICEOSOME	124	1876	324	0.826023	0.882103	0.091238	0.887233	0.173977
REACTOME_TRANSMISSION_ACROSS_CHEMICAL_SYNAPSES	267	1875	325	0.82594	0.663372	0.00108287	0.691394	0.17406
KEGG_TERPENOID_BACKBONE_BIOSYNTHESIS	15	1874	326	0.825658	0.467108	0.195621	0.555016	0.174342
PID_AR_PATHWAY	61	1873	327	0.823476	0.909142	0.0985372	0.577449	0.176524
REACTOME_ACTIVATION_OF_CASPASES_THROUGH_APOPTOSOME_MEDIATED_CLEAVAGE	6	1872	328	0.823281	0.517889	0.259312	0.65722	0.176719
REACTOME_RUNX2_REGULATES_GENES_INVOLVED_IN_CELL_MIGRATION	8	1871	329	0.822897	0.48977	0.113674	0.123251	0.177103
REACTOME_CARBOXYTERMINAL_POST_TRANSLATIONAL_MODIFICATIONS_OF_TUBULIN	41	1870	330	0.822684	0.603422	0.0539654	0.0469455	0.177316
REACTOME_SIGNALING_BY_LIGAND_RESPONSIVE_EGFR_VARIANTS_IN_CANCER	18	1869	331	0.822382	0.640266	0.158486	0.751243	0.177618
REACTOME_PHASE_II_CONJUGATION_OF_COMPOUNDS	109	1868	332	0.822332	0.592124	0.0718254	0.690422	0.177668
REACTOME_ADP_SIGNALLING_THROUGH_P2Y_PURINOCEPTOR_1	24	1867	333	0.820304	0.270935	0.0335166	0.0356704	0.179696
REACTOME_SUMOYLATION_OF_TRANSCRIPTION_FACTORS	20	1866	334	0.820294	0.913095	0.34404	0.836517	0.179706
REACTOME_CHOLESTEROL_BIOSYNTHESIS	24	1865	335	0.820202	0.595786	0.0846232	0.573345	0.179798
REACTOME_REGULATION_OF_PTEN_MRNA_TRANSLATION	9	1864	336	0.81964	0.833154	0.31885	0.777961	0.18036
REACTOME_TRANSPORT_TO_THE_GOLGI_AND_SUBSEQUENT_MODIFICATION	184	1863	337	0.819009	0.82756	0.0298917	0.557424	0.180991
REACTOME_HSF1_DEPENDENT_TRANSACTIVATION	38	1862	338	0.817182	0.435148	0.0895323	0.881832	0.182818
REACTOME_FORMATION_OF_INCISION_COMPLEX_IN_GG_NER	43	1861	339	0.81711	0.844948	0.13661	0.688193	0.18289
KEGG_ONE_CARBON_POOL_BY_FOLATE	17	1860	340	0.81693	0.810155	0.229112	0.65572	0.18307
REACTOME_SYNTHESIS_OF_UDP_N_ACETYL_GLUCOSAMINE	8	1859	341	0.816172	0.519216	0.113208	0.236293	0.183828
BIOCARTA_TEL_PATHWAY	17	1858	342	0.815142	0.714371	0.247803	0.793523	0.184858
PID_HNF3B_PATHWAY	45	1857	343	0.814983	0.553615	0.0115631	0.600469	0.185017
REACTOME_GLYCOGEN_SYNTHESIS	16	1856	344	0.814283	0.737983	0.325103	0.87314	0.185717
REACTOME_SYNTHESIS_OF_GLYCOSYLPHOSPHATIDYLINOSITOL_GPI	18	1855	345	0.813989	0.73026	0.0677578	0.0308261	0.186011
REACTOME_DISPLACEMENT_OF_DNA_GLYCOSYLASE_BY_APEX1	9	1854	346	0.81368	0.551169	0.168522	0.308373	0.18632
REACTOME_INHIBITION_OF_THE_PROTEOLYTIC_ACTIVITY_OF_APC_C_REQUIRED_FOR_THE_ONSET_OF_ANAPHASE_BY_MITOTIC_SPINDLE_CHECKPOINT_COMPONENTS	20	1853	347	0.813589	0.76242	0.169879	0.744456	0.186411
PID_EPHA2_FWD_PATHWAY	19	1852	348	0.812924	0.326593	0.0428547	0.71034	0.187076
PID_S1P_S1P4_PATHWAY	14	1851	349	0.812584	0.84623	0.181289	0.590737	0.187416
REACTOME_GLOBAL_GENOME_NUCLEOTIDE_EXCISION_REPAIR_GG_NER	84	1850	350	0.812298	0.897822	0.106007	0.852553	0.187702
REACTOME_MITOCHONDRIAL_FATTY_ACID_BETA_OXIDATION_OF_SATURATED_FATTY_ACIDS	10	1849	351	0.812159	0.460316	0.209541	0.734589	0.187841
REACTOME_RNA_POLYMERASE_III_TRANSCRIPTION	41	1848	352	0.812154	0.799294	0.134699	0.80801	0.187846
REACTOME_GLYCOGEN_STORAGE_DISEASES	16	1847	353	0.811802	0.611543	0.217272	0.820637	0.188198
REACTOME_NEGATIVE_REGULATION_OF_NMDA_RECEPTOR_MEDIATED_NEURONAL_TRANSMISSION	21	1846	354	0.811519	0.839017	0.252724	0.928192	0.188481
REACTOME_INTRAFLAGELLAR_TRANSPORT	53	1845	355	0.810856	0.607939	0.0900706	0.695291	0.189144
REACTOME_RSK_ACTIVATION	7	1844	356	0.810759	0.889756	0.27904	0.475531	0.189241
REACTOME_RAS_ACTIVATION_UPON_CA2PLUS_INFLUX_THROUGH_NMDA_RECEPTOR	20	1843	357	0.810155	0.86455	0.228335	0.882433	0.189845
REACTOME_METHYLATION	14	1842	358	0.810067	0.672838	0.28591	0.706126	0.189933
BIOCARTA_PRC2_PATHWAY	14	1841	359	0.809941	0.80173	0.372629	0.813834	0.190059
KEGG_CITRATE_CYCLE_TCA_CYCLE	31	1840	360	0.809742	0.790565	0.186911	0.772377	0.190258
BIOCARTA_IGF1MTOR_PATHWAY	19	1839	361	0.809376	0.627612	0.211719	0.787473	0.190624
REACTOME_NEURONAL_SYSTEM	407	1838	362	0.809225	0.719039	0.00109046	0.521623	0.190775
REACTOME_IONOTROPIC_ACTIVITY_OF_KAINATE_RECEPTORS	10	1837	363	0.809088	0.727545	0.199931	0.570588	0.190912
REACTOME_ARACHIDONATE_PRODUCTION_FROM_DAG	5	1836	364	0.808155	0.326472	0.209315	0.531879	0.191845
REACTOME_DUAL_INCISION_IN_TC_NER	65	1835	365	0.80746	0.918143	0.0948364	0.302569	0.19254
KEGG_WNT_SIGNALING_PATHWAY	150	1834	366	0.806591	0.370595	0.000573826	0.722157	0.193409
REACTOME_CYCLIN_A:CDK2_ASSOCIATED_EVENTS_AT_S_PHASE_ENTRY	84	1833	367	0.805911	0.896261	0.115969	0.711014	0.194089
REACTOME_UNBLOCKING_OF_NMDA_RECEPTORS_GLUTAMATE_BINDING_AND_ACTIVATION	21	1832	368	0.805734	0.893009	0.237547	0.790338	0.194266
BIOCARTA_RHO_PATHWAY	21	1831	369	0.804716	0.695654	0.2604	0.843481	0.195284
REACTOME_P75NTR_NEGATIVELY_REGULATES_CELL_CYCLE_VIA_SC1	6	1830	370	0.803591	0.724114	0.324163	0.77086	0.196409
REACTOME_TRNA_MODIFICATION_IN_THE_MITOCHONDRION	9	1829	371	0.803218	0.86032	0.343712	0.687965	0.196782
BIOCARTA_CB1R_PATHWAY	7	1828	372	0.803166	0.532	0.132649	0.116663	0.196834
REACTOME_MITOCHONDRIAL_CALCIUM_ION_TRANSPORT	20	1827	373	0.802885	0.865064	0.249253	0.777799	0.197115
REACTOME_LYSINE_CATABOLISM	12	1826	374	0.802707	0.568592	0.076734	0.137861	0.197293
PID_ER_NONGENOMIC_PATHWAY	40	1825	375	0.801594	0.36851	0.0252047	0.752926	0.198406
REACTOME_MITOTIC_TELOPHASE_CYTOKINESIS	12	1824	376	0.801391	0.779926	0.21352	0.451988	0.198609
KEGG_PORPHYRIN_AND_CHLOROPHYLL_METABOLISM	41	1823	377	0.800971	0.494619	0.261246	0.526099	0.199029
REACTOME_RNA_POLYMERASE_III_CHAIN_ELONGATION	18	1822	378	0.79902	0.563348	0.154882	0.743339	0.20098
REACTOME_PKA_MEDIATED_PHOSPHORYLATION_OF_CREB	19	1821	379	0.799007	0.903619	0.244012	0.721525	0.200993
REACTOME_REGULATION_OF_TP53_ACTIVITY	157	1820	380	0.798684	0.842079	0.0550447	0.632007	0.201316
PID_BETA_CATENIN_DEG_PATHWAY	18	1819	381	0.798403	0.648845	0.144614	0.566523	0.201597
REACTOME_ATF6_ATF6_ALPHA_ACTIVATES_CHAPERONES	12	1818	382	0.797775	0.466672	0.27993	0.819981	0.202225
BIOCARTA_SARS_PATHWAY	7	1817	383	0.797521	0.786755	0.27732	0.714955	0.202479
BIOCARTA_CACAM_PATHWAY	9	1816	384	0.797139	0.818149	0.266298	0.644817	0.202861
PID_ARF6_DOWNSTREAM_PATHWAY	15	1815	385	0.796338	0.732461	0.152903	0.374497	0.203662
BIOCARTA_PLCE_PATHWAY	11	1814	386	0.796276	0.917272	0.387661	0.801766	0.203724
REACTOME_ASPARTATE_AND_ASPARAGINE_METABOLISM	11	1813	387	0.795451	0.591124	0.17859	0.512913	0.204549
REACTOME_DARPP_32_EVENTS	23	1812	388	0.795359	0.779166	0.246795	0.86189	0.204641
BIOCARTA_TERT_PATHWAY	8	1811	389	0.794066	0.85107	0.203491	0.177089	0.205934
REACTOME_AMPK_INHIBITS_CHREBP_TRANSCRIPTIONAL_ACTIVATION_ACTIVITY	8	1810	390	0.79406	0.477604	0.226409	0.662631	0.20594
REACTOME_VEGFR2_MEDIATED_VASCULAR_PERMEABILITY	27	1809	391	0.793795	0.882571	0.188556	0.599086	0.206205
REACTOME_TP53_REGULATES_METABOLIC_GENES	83	1808	392	0.793339	0.854028	0.124671	0.852507	0.206661
REACTOME_NEGATIVE_REGULATION_OF_TCF_DEPENDENT_SIGNALING_BY_DVL_INTERACTING_PROTEINS	5	1807	393	0.792836	0.459094	0.15547	0.0952997	0.207164
BIOCARTA_P27_PATHWAY	13	1806	394	0.792616	0.863676	0.379534	0.827277	0.207384
REACTOME_VISUAL_PHOTOTRANSDUCTION	99	1805	395	0.790379	0.819853	0.0712037	0.512305	0.209621
REACTOME_CLASS_I_PEROXISOMAL_MEMBRANE_PROTEIN_IMPORT	20	1804	396	0.789901	0.86206	0.148833	0.0154629	0.210099
REACTOME_INTERACTIONS_OF_VPR_WITH_HOST_CELLULAR_PROTEINS	36	1803	397	0.789361	0.880086	0.224898	0.833417	0.210639
PID_LKB1_PATHWAY	46	1802	398	0.788889	0.831879	0.101598	0.801742	0.211111
PID_EPHB_FWD_PATHWAY	40	1801	399	0.78861	0.724474	0.042843	0.773882	0.21139
REACTOME_APC_CDC20_MEDIATED_DEGRADATION_OF_NEK2A	25	1800	400	0.788218	0.835035	0.163784	0.714661	0.211782
REACTOME_FREE_FATTY_ACIDS_REGULATE_INSULIN_SECRETION	11	1799	401	0.788218	0.441804	0.119626	0.171433	0.211782
KEGG_GLYOXYLATE_AND_DICARBOXYLATE_METABOLISM	16	1798	402	0.786959	0.511689	0.151725	0.548547	0.213041
REACTOME_MISCELLANEOUS_TRANSPORT_AND_BINDING_EVENTS	26	1797	403	0.786134	0.786465	0.274161	0.862872	0.213866
KEGG_PROPANOATE_METABOLISM	32	1796	404	0.785995	0.552708	0.104599	0.83321	0.214005
REACTOME_SIGNALING_BY_NTRK1_TRKA	78	1795	405	0.784885	0.517672	0.0626197	0.673622	0.215115
REACTOME_ONCOGENIC_MAPK_SIGNALING	79	1794	406	0.783812	0.880148	0.017366	0.37453	0.216188
REACTOME_GLUCURONIDATION	25	1793	407	0.783661	0.774747	0.870549	0.743468	0.216339
REACTOME_IRAK1_RECRUITS_IKK_COMPLEX	14	1792	408	0.782738	0.747739	0.156259	0.309661	0.217262
REACTOME_FATTY_ACYL_COA_BIOSYNTHESIS	32	1791	409	0.78257	0.782142	0.166498	0.814087	0.21743
REACTOME_DEFECTS_IN_COBALAMIN_B12_METABOLISM	12	1790	410	0.782354	0.728127	0.241911	0.417147	0.217646
REACTOME_CITRIC_ACID_CYCLE_TCA_CYCLE	22	1789	411	0.782062	0.695487	0.141629	0.634398	0.217938
REACTOME_SCAVENGING_BY_CLASS_F_RECEPTORS	6	1788	412	0.781628	0.892627	0.370755	0.795767	0.218372
REACTOME_SIGNAL_AMPLIFICATION	31	1787	413	0.781595	0.337493	0.0393064	0.122716	0.218405
REACTOME_TRANS_GOLGI_NETWORK_VESICLE_BUDDING	72	1786	414	0.781225	0.772201	0.0510031	0.585072	0.218775
PID_ARF6_PATHWAY	35	1785	415	0.780057	0.770595	0.0203866	0.348797	0.219943
BIOCARTA_CIRCADIAN_PATHWAY	5	1784	416	0.779787	0.586689	0.144068	0.0792949	0.220213
BIOCARTA_ACETAMINOPHEN_PATHWAY	5	1783	417	0.779386	0.258225	0.0511375	0.00466315	0.220614
REACTOME_GLUTAMATE_AND_GLUTAMINE_METABOLISM	12	1782	418	0.779355	0.748486	0.170563	0.232641	0.220645
REACTOME_SIGNALING_BY_TYPE_1_INSULIN_LIKE_GROWTH_FACTOR_1_RECEPTOR_IGF1R	54	1781	419	0.778847	0.283534	0.0539755	0.710469	0.221153
REACTOME_RELEASE_OF_HH_NP_FROM_THE_SECRETING_CELL	8	1780	420	0.778066	0.899955	0.26027	0.672234	0.221934
REACTOME_AUTOPHAGY	105	1779	421	0.777112	0.573963	0.0887527	0.895931	0.222888
REACTOME_SUMOYLATION_OF_DNA_METHYLATION_PROTEINS	16	1778	422	0.777108	0.805758	0.208764	0.618186	0.222892
BIOCARTA_AGR_PATHWAY	32	1777	423	0.775749	0.747404	0.0522798	0.541126	0.224251
REACTOME_NEUROTRANSMITTER_RECEPTORS_AND_POSTSYNAPTIC_SIGNAL_TRANSMISSION	203	1776	424	0.775169	0.687948	0.00276653	0.620818	0.224831
REACTOME_SIGNALING_BY_BRAF_AND_RAF_FUSIONS	63	1775	425	0.775051	1	0.0716958	0.564434	0.224949
REACTOME_BIOSYNTHESIS_OF_THE_N_GLYCAN_PRECURSOR_DOLICHOL_LIPID_LINKED_OLIGOSACCHARIDE_LLO_AND_TRANSFER_TO_A_NASCENT_PROTEIN	77	1774	426	0.774459	0.655973	0.0350585	0.767771	0.225541
REACTOME_NEUREXINS_AND_NEUROLIGINS	56	1773	427	0.774345	0.760281	0.0521028	0.580418	0.225655
REACTOME_GAMMA_CARBOXYLATION_HYPUSINE_FORMATION_AND_ARYLSULFATASE_ACTIVATION	39	1772	428	0.774047	0.854573	0.107123	0.528915	0.225953
REACTOME_PLATELET_HOMEOSTASIS	82	1771	429	0.773623	0.786696	0.0446676	0.823617	0.226377
REACTOME_NOREPINEPHRINE_NEUROTRANSMITTER_RELEASE_CYCLE	17	1770	430	0.77279	0.416976	0.0867236	0.321451	0.22721
KEGG_GLYCOSAMINOGLYCAN_BIOSYNTHESIS_CHONDROITIN_SULFATE	22	1769	431	0.772515	0.697627	0.115227	0.602335	0.227485
BIOCARTA_CK1_PATHWAY	15	1768	432	0.770657	0.780521	0.387677	0.842181	0.229343
REACTOME_DEACTIVATION_OF_THE_BETA_CATENIN_TRANSACTIVATING_COMPLEX	42	1767	433	0.770436	0.901352	0.331211	0.909037	0.229564
REACTOME_NADE_MODULATES_DEATH_SIGNALLING	5	1766	434	0.770352	0.0618516	0.399033	0.856295	0.229648
PID_INSULIN_GLUCOSE_PATHWAY	26	1765	435	0.76923	0.720899	0.172933	0.629653	0.23077
REACTOME_HIV_ELONGATION_ARREST_AND_RECOVERY	29	1764	436	0.769029	0.846929	0.235968	0.790832	0.230971
REACTOME_REGULATION_OF_HSF1_MEDIATED_HEAT_SHOCK_RESPONSE	79	1763	437	0.767855	0.717717	0.0733195	0.831039	0.232145
REACTOME_GABA_RECEPTOR_ACTIVATION	55	1762	438	0.767702	0.370651	0.00547906	0.0596854	0.232298
REACTOME_G_PROTEIN_GATED_POTASSIUM_CHANNELS	24	1761	439	0.767688	0.160964	0.0347691	0.386513	0.232312
REACTOME_REGULATION_OF_PTEN_STABILITY_AND_ACTIVITY	68	1760	440	0.767472	0.786971	0.122081	0.83919	0.232528
REACTOME_REGULATION_OF_BETA_CELL_DEVELOPMENT	42	1759	441	0.7673	0.279921	0.202747	0.872847	0.2327
REACTOME_ENOS_ACTIVATION	11	1758	442	0.767175	0.883563	0.285391	0.796016	0.232825
BIOCARTA_EIF_PATHWAY	16	1757	443	0.766185	0.826256	0.318288	0.807374	0.233815
REACTOME_TFAP2_AP_2_FAMILY_REGULATES_TRANSCRIPTION_OF_CELL_CYCLE_FACTORS	5	1756	444	0.76606	0.897014	0.375311	0.666149	0.23394
REACTOME_CARGO_CONCENTRATION_IN_THE_ER	32	1755	445	0.765488	0.249504	0.0366546	0.126688	0.234512
REACTOME_RHO_GTPASE_CYCLE	138	1754	446	0.765438	0.822654	0.0321484	0.642215	0.234562
REACTOME_AXON_GUIDANCE	546	1753	447	0.764424	0.883878	0.0122797	0.892175	0.235576
REACTOME_SIGNALING_BY_FGFR_IN_DISEASE	63	1752	448	0.763969	0.867301	0.216788	0.883777	0.236031
REACTOME_RELEASE_OF_APOPTOTIC_FACTORS_FROM_THE_MITOCHONDRIA	5	1751	449	0.760712	0.704834	0.246341	0.442779	0.239288
REACTOME_ATF6_ATF6_ALPHA_ACTIVATES_CHAPERONE_GENES	10	1750	450	0.760698	0.475688	0.259773	0.798104	0.239302
REACTOME_REGULATION_OF_PLK1_ACTIVITY_AT_G2_M_TRANSITION	86	1749	451	0.759818	0.918665	0.209922	0.897899	0.240182
REACTOME_HEDGEHOG_LIGAND_BIOGENESIS	64	1748	452	0.75951	0.834904	0.128935	0.776482	0.24049
REACTOME_M_PHASE	381	1747	453	0.759255	0.889136	0.0634544	0.906293	0.240745
REACTOME_SUMOYLATION_OF_RNA_BINDING_PROTEINS	46	1746	454	0.758734	0.880064	0.206297	0.812118	0.241266
REACTOME_REPRESSION_OF_WNT_TARGET_GENES	13	1745	455	0.758687	0.779995	0.399425	0.865266	0.241313
REACTOME_MUCOPOLYSACCHARIDOSES	11	1744	456	0.757904	0.817743	0.200427	0.467919	0.242096
REACTOME_TRANSCRIPTIONAL_REGULATION_BY_TP53	348	1743	457	0.757539	0.813996	0.030983	0.751157	0.242461
PID_RANBP2_PATHWAY	11	1742	458	0.757404	0.744644	0.324425	0.710038	0.242596
REACTOME_INSERTION_OF_TAIL_ANCHORED_PROTEINS_INTO_THE_ENDOPLASMIC_RETICULUM_MEMBRANE	22	1741	459	0.757206	0.614303	0.146596	0.612439	0.242794
KEGG_BUTANOATE_METABOLISM	34	1740	460	0.757049	0.415232	0.0415234	0.748579	0.242951
REACTOME_RESOLUTION_OF_ABASIC_SITES_AP_SITES	38	1739	461	0.756296	0.79161	0.120625	0.588294	0.243704
PID_NCADHERIN_PATHWAY	33	1738	462	0.755478	0.92268	0.342642	0.728416	0.244522
BIOCARTA_AKAPCENTROSOME_PATHWAY	14	1737	463	0.755245	0.805281	0.451013	0.92234	0.244755
REACTOME_MYOGENESIS	29	1736	464	0.754839	0.913892	0.284718	0.795314	0.245161
BIOCARTA_BARR_MAPK_PATHWAY	13	1735	465	0.754727	0.88952	0.221111	0.539935	0.245273
REACTOME_BIOSYNTHESIS_OF_MARESINS	8	1734	466	0.754502	0.150256	0.102366	0.00512515	0.245498
REACTOME_HDL_ASSEMBLY	8	1733	467	0.753728	0.396163	0.234293	0.566037	0.246272
REACTOME_G_ALPHA_Q_SIGNALLING_EVENTS	215	1732	468	0.752434	0.425594	0.00151381	0.428204	0.247566
REACTOME_CELL_DEATH_SIGNALLING_VIA_NRAGE_NRIF_AND_NADE	75	1731	469	0.75226	0.800686	0.167844	0.796324	0.24774
REACTOME_INSULIN_RECEPTOR_SIGNALLING_CASCADE	54	1730	470	0.751646	0.483016	0.0235763	0.692766	0.248354
REACTOME_RNA_POLYMERASE_III_TRANSCRIPTION_TERMINATION	23	1729	471	0.751386	0.670994	0.163989	0.791785	0.248614
REACTOME_HDL_CLEARANCE	5	1728	472	0.750948	0.810486	0.395886	0.348969	0.249052
REACTOME_SIGNALING_BY_WNT	324	1727	473	0.750906	0.829967	0.0053532	0.784668	0.249094
REACTOME_RECEPTOR_TYPE_TYROSINE_PROTEIN_PHOSPHATASES	20	1726	474	0.750368	0.794866	0.181079	0.510515	0.249632
REACTOME_TRNA_MODIFICATION_IN_THE_NUCLEUS_AND_CYTOSOL	40	1725	475	0.750331	0.44232	0.107621	0.706667	0.249669
REACTOME_DISEASES_OF_CARBOHYDRATE_METABOLISM	34	1724	476	0.749859	0.638734	0.139966	0.777448	0.250141
BIOCARTA_RAN_PATHWAY	5	1723	477	0.749804	0.87271	0.37856	0.79788	0.250196
KEGG_PEROXISOME	78	1722	478	0.749673	0.894834	0.0130896	0.037487	0.250327
REACTOME_BIOLOGICAL_OXIDATIONS	220	1721	479	0.749479	0.36868	0.00131259	0.264866	0.250521
REACTOME_PINK_PARKIN_MEDIATED_MITOPHAGY	19	1720	480	0.749007	0.774909	0.273083	0.786233	0.250993
REACTOME_CALCITONIN_LIKE_LIGAND_RECEPTORS	10	1719	481	0.746066	0.519418	0.269877	0.599348	0.253934
REACTOME_METABOLISM_OF_NITRIC_OXIDE:_ENOS_ACTIVATION_AND_REGULATION	15	1718	482	0.745764	0.880163	0.327695	0.84868	0.254236
SA_TRKA_RECEPTOR	17	1717	483	0.745622	0.378017	0.141429	0.756798	0.254378
BIOCARTA_BARRESTIN_PATHWAY	11	1716	484	0.745457	0.777509	0.11235	0.127466	0.254543
REACTOME_IRS_MEDIATED_SIGNALLING	48	1715	485	0.744964	0.306803	0.0591734	0.70306	0.255036
REACTOME_INTERACTIONS_OF_REV_WITH_HOST_CELLULAR_PROTEINS	36	1714	486	0.744649	0.896419	0.264048	0.872463	0.255351
KEGG_GLYCEROPHOSPHOLIPID_METABOLISM	72	1713	487	0.744073	0.161892	0.000659031	0.231063	0.255927
KEGG_HEDGEHOG_SIGNALING_PATHWAY	56	1712	488	0.744071	0.771726	0.00241329	0.675808	0.255929
REACTOME_MITOCHONDRIAL_FATTY_ACID_BETA_OXIDATION	35	1711	489	0.742928	0.703915	0.153417	0.720511	0.257072
REACTOME_CYTOSOLIC_IRON_SULFUR_CLUSTER_ASSEMBLY	11	1710	490	0.742762	0.534507	0.0946938	0.218497	0.257238
REACTOME_SUMOYLATION_OF_DNA_REPLICATION_PROTEINS	45	1709	491	0.742619	0.8927	0.282467	0.844366	0.257381
KEGG_RETINOL_METABOLISM	63	1708	492	0.741248	0.686064	0.310644	0.619181	0.258752
REACTOME_SYNTHESIS_OF_PIPS_AT_THE_GOLGI_MEMBRANE	18	1707	493	0.740408	0.496351	0.0988085	0.322201	0.259592
BIOCARTA_EIF2_PATHWAY	10	1706	494	0.740388	0.631094	0.307373	0.754596	0.259612
PID_INSULIN_PATHWAY	44	1705	495	0.739455	0.760901	0.0603433	0.219058	0.260545
REACTOME_FORMATION_OF_XYLULOSE_5_PHOSPHATE	5	1704	496	0.739369	0.886205	0.423609	0.740525	0.260631
KEGG_PYRUVATE_METABOLISM	40	1703	497	0.73919	0.603466	0.0588061	0.628439	0.26081
BIOCARTA_NFAT_PATHWAY	50	1702	498	0.738764	0.785328	0.221679	0.843109	0.261236
REACTOME_TRANSPORT_OF_MATURE_MRNAS_DERIVED_FROM_INTRONLESS_TRANSCRIPTS	42	1701	499	0.738404	0.897791	0.198187	0.806338	0.261596
REACTOME_AKT_PHOSPHORYLATES_TARGETS_IN_THE_NUCLEUS	10	1700	500	0.738226	0.127211	0.127178	0.596896	0.261774
REACTOME_RNA_POLYMERASE_III_TRANSCRIPTION_INITIATION_FROM_TYPE_3_PROMOTER	28	1699	501	0.737154	0.603483	0.147562	0.794406	0.262846
REACTOME_MAP2K_AND_MAPK_ACTIVATION	40	1698	502	0.736307	0.931623	0.0326493	0.598751	0.263693
BIOCARTA_NO1_PATHWAY	28	1697	503	0.736199	0.89056	0.19869	0.893071	0.263801
REACTOME_HIGHLY_SODIUM_PERMEABLE_ACETYLCHOLINE_NICOTINIC_RECEPTORS	7	1696	504	0.736138	0.789934	0.455813	0.547613	0.263862
REACTOME_METABOLISM_OF_VITAMINS_AND_COFACTORS	182	1695	505	0.735997	0.814414	0.0265225	0.824178	0.264003
REACTOME_CRMPS_IN_SEMA3A_SIGNALING	16	1694	506	0.735431	0.901339	0.178315	0.388528	0.264569
REACTOME_RNA_POLYMERASE_I_TRANSCRIPTION_INITIATION	47	1693	507	0.734625	0.766883	0.1182	0.630965	0.265375
REACTOME_GABA_B_RECEPTOR_ACTIVATION	38	1692	508	0.733229	0.265618	0.00933696	0.203456	0.266771
REACTOME_DEGRADATION_OF_BETA_CATENIN_BY_THE_DESTRUCTION_COMPLEX	82	1691	509	0.733076	0.841949	0.142278	0.888724	0.266924
REACTOME_IMPORT_OF_PALMITOYL_COA_INTO_THE_MITOCHONDRIAL_MATRIX	14	1690	510	0.731958	0.409281	0.096727	0.563296	0.268042
REACTOME_G_PROTEIN_MEDIATED_EVENTS	52	1689	511	0.73161	0.677588	0.0573534	0.746969	0.26839
KEGG_LONG_TERM_POTENTIATION	70	1688	512	0.731458	0.843404	0.223198	0.829583	0.268542
REACTOME_INWARDLY_RECTIFYING_KPLUS_CHANNELS	30	1687	513	0.731087	0.118058	0.0237057	0.540785	0.268913
REACTOME_SIGNALING_BY_FGFR3	40	1686	514	0.730725	0.513049	0.120383	0.77387	0.269275
REACTOME_PROCESSING_OF_SMDT1	14	1685	515	0.73052	0.867195	0.220566	0.558295	0.26948
KEGG_INSULIN_SIGNALING_PATHWAY	137	1684	516	0.730107	0.535432	0.00460788	0.906375	0.269893
REACTOME_AMINE_LIGAND_BINDING_RECEPTORS	42	1683	517	0.730081	0.835384	0.56677	0.550501	0.269919
REACTOME_O_LINKED_GLYCOSYLATION	104	1682	518	0.729907	0.296071	0.0051303	0.295279	0.270093
REACTOME_SEROTONIN_AND_MELATONIN_BIOSYNTHESIS	5	1681	519	0.729759	0.861353	0.4303	0.186286	0.270241
REACTOME_OLFACTORY_SIGNALING_PATHWAY	389	1680	520	0.729299	0.670226	0.925785	0.576218	0.270701
PID_CIRCADIAN_PATHWAY	15	1679	521	0.728632	0.5424	0.149531	0.179763	0.271368
BIOCARTA_ACTINY_PATHWAY	12	1678	522	0.728558	0.549065	0.219546	0.806169	0.271442
REACTOME_MTOR_SIGNALLING	39	1677	523	0.726359	0.766197	0.123821	0.756931	0.273641
REACTOME_PCP_CE_PATHWAY	91	1676	524	0.726112	0.856233	0.0644699	0.760551	0.273888
REACTOME_GLUCOSE_METABOLISM	91	1675	525	0.726046	0.603801	0.0542084	0.792579	0.273954
REACTOME_DOWNSTREAM_SIGNALING_OF_ACTIVATED_FGFR1	31	1674	526	0.725676	0.390053	0.109055	0.826157	0.274324
BIOCARTA_MTOR_PATHWAY	21	1673	527	0.725668	0.824367	0.312646	0.856502	0.274332
REACTOME_TFAP2A_ACTS_AS_A_TRANSCRIPTIONAL_REPRESSOR_DURING_RETINOIC_ACID_INDUCED_CELL_DIFFERENTIATION	5	1672	528	0.725078	0.891536	0.40335	0.760323	0.274922
REACTOME_RNA_POLYMERASE_II_TRANSCRIPTION_TERMINATION	66	1671	529	0.724359	0.913798	0.123454	0.554512	0.275641
REACTOME_PHOSPHORYLATION_OF_THE_APC_C	19	1670	530	0.723156	0.771727	0.182701	0.698932	0.276844
KEGG_CIRCADIAN_RHYTHM_MAMMAL	12	1669	531	0.723122	0.104166	0.0269822	0.0426331	0.276878
BIOCARTA_CTBP1_PATHWAY	8	1668	532	0.722707	0.893738	0.394706	0.783623	0.277293
REACTOME_SIGNALING_BY_INSULIN_RECEPTOR	78	1667	533	0.721008	0.540106	0.0360899	0.557713	0.278992
REACTOME_RESPIRATORY_ELECTRON_TRANSPORT_ATP_SYNTHESIS_BY_CHEMIOSMOTIC_COUPLING_AND_HEAT_PRODUCTION_BY_UNCOUPLING_PROTEINS	106	1666	534	0.721002	0.85165	0.185717	0.858693	0.278998
PID_ECADHERIN_KERATINOCYTE_PATHWAY	21	1665	535	0.719823	0.805223	0.295274	0.816298	0.280177
BIOCARTA_INTRINSIC_PATHWAY	23	1664	536	0.71936	0.631102	0.00182941	0.104459	0.28064
REACTOME_TRANSMISSION_ACROSS_ELECTRICAL_SYNAPSES	5	1663	537	0.719271	0.866611	0.617295	0.667874	0.280729
BIOCARTA_EGFR_SMRTE_PATHWAY	11	1662	538	0.718714	0.329042	0.184738	0.660451	0.281286
REACTOME_MITOTIC_G2_G2_M_PHASES	197	1661	539	0.718574	0.827257	0.0645197	0.835276	0.281426
REACTOME_VITAMIN_B1_THIAMIN_METABOLISM	5	1660	540	0.718319	0.755112	0.326405	0.610711	0.281681
REACTOME_DOWNSTREAM_SIGNALING_OF_ACTIVATED_FGFR2	30	1659	541	0.718182	0.468713	0.191135	0.892016	0.281818
REACTOME_SIGNALING_BY_FGFR4	41	1658	542	0.7162	0.553854	0.151226	0.774882	0.2838
REACTOME_FOXO_MEDIATED_TRANSCRIPTION_OF_CELL_DEATH_GENES	16	1657	543	0.716146	0.321281	0.124074	0.788148	0.283854
KEGG_HISTIDINE_METABOLISM	28	1656	544	0.715817	0.131168	0.0180343	0.693671	0.284183
REACTOME_INTRACELLULAR_SIGNALING_BY_SECOND_MESSENGERS	300	1655	545	0.713087	0.623714	0.0590975	0.907258	0.286913
REACTOME_NEGATIVE_REGULATION_OF_MAPK_PATHWAY	40	1654	546	0.71177	0.628015	0.103064	0.689343	0.28823
KEGG_BASAL_CELL_CARCINOMA	55	1653	547	0.711447	0.705544	0.00264044	0.520589	0.288553
PID_P38_GAMMA_DELTA_PATHWAY	10	1652	548	0.711419	0.347547	0.128614	0.56823	0.288581
PID_ARF_3PATHWAY	19	1651	549	0.711205	0.447901	0.121101	0.612378	0.288795
REACTOME_PEPTIDE_HORMONE_METABOLISM	85	1650	550	0.711072	0.639865	0.0752926	0.560462	0.288928
REACTOME_TRANSPORT_OF_NUCLEOSIDES_AND_FREE_PURINE_AND_PYRIMIDINE_BASES_ACROSS_THE_PLASMA_MEMBRANE	12	1649	551	0.711064	0.528225	0.188288	0.418021	0.288936
REACTOME_SIGNALING_BY_NTRKS	99	1648	552	0.711045	0.493923	0.0486473	0.838695	0.288955
BIOCARTA_HES_PATHWAY	12	1647	553	0.710122	0.477894	0.175551	0.241303	0.289878
REACTOME_SYNTHESIS_OF_VERY_LONG_CHAIN_FATTY_ACYL_COAS	20	1646	554	0.709692	0.727723	0.175929	0.70578	0.290308
BIOCARTA_PTDINS_PATHWAY	23	1645	555	0.709424	0.603793	0.164062	0.65227	0.290576
REACTOME_COMPLEX_I_BIOGENESIS	55	1644	556	0.708777	0.908489	0.201736	0.740931	0.291223
REACTOME_NEPHRIN_FAMILY_INTERACTIONS	22	1643	557	0.708473	0.614176	0.0995977	0.385075	0.291527
REACTOME_HS_GAG_BIOSYNTHESIS	31	1642	558	0.707296	0.428344	0.0701987	0.741224	0.292704
REACTOME_DOWNSTREAM_SIGNALING_OF_ACTIVATED_FGFR3	25	1641	559	0.706673	0.456108	0.152398	0.743282	0.293327
REACTOME_VITAMIN_B5_PANTOTHENATE_METABOLISM	17	1640	560	0.706614	0.729614	0.180071	0.757241	0.293386
REACTOME_NUCLEAR_PORE_COMPLEX_NPC_DISASSEMBLY	35	1639	561	0.706605	0.892612	0.203848	0.707498	0.293395
REACTOME_MITOPHAGY	26	1638	562	0.706009	0.624399	0.229918	0.857663	0.293991
REACTOME_INTRA_GOLGI_TRAFFIC	43	1637	563	0.705289	0.860921	0.126837	0.12175	0.294711
REACTOME_CHREBP_ACTIVATES_METABOLIC_GENE_EXPRESSION	8	1636	564	0.705207	0.781062	0.285472	0.700326	0.294793
REACTOME_FOLDING_OF_ACTIN_BY_CCT_TRIC	10	1635	565	0.705062	0.73767	0.314691	0.699305	0.294938
REACTOME_NUCLEAR_IMPORT_OF_REV_PROTEIN	33	1634	566	0.704592	0.86834	0.254222	0.834847	0.295408
REACTOME_SYNTHESIS_OF_16_20_HYDROXYEICOSATETRAENOIC_ACIDS_HETE	9	1633	567	0.704489	0.34754	0.273993	0.0243786	0.295511
REACTOME_IRAK2_MEDIATED_ACTIVATION_OF_TAK1_COMPLEX	10	1632	568	0.704479	0.830829	0.361454	0.765163	0.295521
REACTOME_PREFOLDIN_MEDIATED_TRANSFER_OF_SUBSTRATE_TO_CCT_TRIC	28	1631	569	0.704031	0.712162	0.161487	0.641462	0.295969
PID_HIF1A_PATHWAY	16	1630	570	0.703961	0.649185	0.314925	0.85436	0.296039
REACTOME_BETA_OXIDATION_OF_PRISTANOYL_COA	9	1629	571	0.703526	0.829455	0.262025	0.725187	0.296474
REACTOME_SIGNAL_TRANSDUCTION_BY_L1	21	1628	572	0.702638	0.601416	0.218773	0.825009	0.297362
KEGG_PURINE_METABOLISM	154	1627	573	0.70256	0.832133	0.0181193	0.817521	0.29744
REACTOME_FORMATION_OF_FIBRIN_CLOT_CLOTTING_CASCADE	39	1626	574	0.70239	0.263715	0.0162296	0.0849889	0.29761
PID_S1P_S1P3_PATHWAY	29	1625	575	0.70188	0.736012	0.103611	0.470561	0.29812
REACTOME_PRESYNAPTIC_DEPOLARIZATION_AND_CALCIUM_CHANNEL_OPENING	12	1624	576	0.701131	0.709698	0.257389	0.775743	0.298869
REACTOME_TELOMERE_EXTENSION_BY_TELOMERASE	6	1623	577	0.700943	0.378298	0.307171	0.811202	0.299057
REACTOME_REGULATION_OF_MECP2_EXPRESSION_AND_ACTIVITY	32	1622	578	0.700887	0.907127	0.42674	0.914935	0.299113
REACTOME_HSF1_ACTIVATION	31	1621	579	0.700704	0.35255	0.112514	0.770176	0.299296
REACTOME_CONVERSION_FROM_APC_C:CDC20_TO_APC_C:CDH1_IN_LATE_ANAPHASE	19	1620	580	0.700206	0.836519	0.197067	0.655495	0.299794
REACTOME_FOXO_MEDIATED_TRANSCRIPTION_OF_CELL_CYCLE_GENES	17	1619	581	0.699166	0.606601	0.229808	0.852784	0.300834
REACTOME_RNA_POLYMERASE_II_TRANSCRIBES_SNRNA_GENES	75	1618	582	0.699061	0.593079	0.0846113	0.441632	0.300939
REACTOME_SYNTHESIS_OF_GDP_MANNOSE	5	1617	583	0.698817	0.498065	0.373452	0.632249	0.301183
REACTOME_TRANSCRIPTIONAL_REGULATION_BY_E2F6	34	1616	584	0.698003	0.886402	0.377771	0.887099	0.301997
REACTOME_HIV_LIFE_CYCLE	144	1615	585	0.697979	0.804024	0.0541127	0.815849	0.302021
REACTOME_REGULATION_OF_MITOTIC_CELL_CYCLE	85	1614	586	0.697296	0.870088	0.147477	0.796459	0.302704
PID_FOXM1_PATHWAY	40	1613	587	0.697172	0.667449	0.087774	0.868701	0.302828
REACTOME_COHESIN_LOADING_ONTO_CHROMATIN	9	1612	588	0.696033	0.782654	0.224231	0.207445	0.303967
REACTOME_ACTIVATION_OF_APC_C_AND_APC_C:CDC20_MEDIATED_DEGRADATION_OF_MITOTIC_PROTEINS	75	1611	589	0.69558	0.796045	0.0962264	0.71277	0.30442
REACTOME_CELL_CYCLE_CHECKPOINTS	280	1610	590	0.694751	0.755421	0.0287375	0.734259	0.305249
REACTOME_CRISTAE_FORMATION	13	1609	591	0.694658	0.735815	0.148303	0.195784	0.305342
REACTOME_POU5F1_OCT4_SOX2_NANOG_ACTIVATE_GENES_RELATED_TO_PROLIFERATION	13	1608	592	0.694364	0.730752	0.0752998	0.0773238	0.305636
REACTOME_TACHYKININ_RECEPTORS_BIND_TACHYKININS	5	1607	593	0.69396	0.794614	0.597814	0.716284	0.30604
REACTOME_TRANSCRIPTIONAL_REGULATION_BY_THE_AP_2_TFAP2_FAMILY_OF_TRANSCRIPTION_FACTORS	37	1606	594	0.693941	0.80444	0.221996	0.823868	0.306059
BIOCARTA_GPCR_PATHWAY	30	1605	595	0.693184	0.796816	0.106727	0.809227	0.306816
REACTOME_HOMOLOGOUS_DNA_PAIRING_AND_STRAND_EXCHANGE	41	1604	596	0.69219	0.85544	0.113632	0.409512	0.30781
REACTOME_DOWNREGULATION_OF_SMAD2_3:SMAD4_TRANSCRIPTIONAL_ACTIVITY	23	1603	597	0.691401	0.795972	0.232928	0.793043	0.308599
PID_S1P_S1P1_PATHWAY	21	1602	598	0.691212	0.724775	0.185834	0.701505	0.308788
REACTOME_PHYSIOLOGICAL_FACTORS	12	1601	599	0.691104	0.482098	0.189773	0.81959	0.308896
REACTOME_METABOLISM_OF_POLYAMINES	57	1600	600	0.690755	0.811546	0.0880061	0.651741	0.309245
REACTOME_KINESINS	59	1599	601	0.690681	0.624358	0.0745946	0.70044	0.309319
REACTOME_PLASMA_LIPOPROTEIN_ASSEMBLY	19	1598	602	0.690231	0.48764	0.306247	0.66353	0.309769
REACTOME_RUNX3_REGULATES_WNT_SIGNALING	8	1597	603	0.690189	0.677937	0.345601	0.821057	0.309811
REACTOME_BIOSYNTHESIS_OF_SPECIALIZED_PRORESOLVING_MEDIATORS_SPMS	19	1596	604	0.69011	0.218949	0.0442674	0.00512204	0.30989
REACTOME_PURINE_SALVAGE	13	1595	605	0.689311	0.625966	0.148898	0.577595	0.310689
REACTOME_SUMOYLATION_OF_UBIQUITINYLATION_PROTEINS	38	1594	606	0.688868	0.887111	0.256469	0.848749	0.311132
REACTOME_PERVASIVE_DEVELOPMENTAL_DISORDERS	13	1593	607	0.688711	0.86037	0.387583	0.886178	0.311289
REACTOME_CD28_DEPENDENT_PI3K_AKT_SIGNALING	22	1592	608	0.688494	0.657072	0.0843112	0.326857	0.311506
REACTOME_TBC_RABGAPS	43	1591	609	0.68848	0.723703	0.129947	0.825435	0.31152
REACTOME_GLYCEROPHOSPHOLIPID_BIOSYNTHESIS	117	1590	610	0.688463	0.326527	0.0238018	0.889439	0.311537
REACTOME_GAP_JUNCTION_DEGRADATION	12	1589	611	0.688011	0.789809	0.154751	0.155768	0.311989
REACTOME_METABOLISM_OF_WATER_SOLUBLE_VITAMINS_AND_COFACTORS	117	1588	612	0.687256	0.778612	0.0799081	0.723884	0.312744
BIOCARTA_SUMO_PATHWAY	6	1587	613	0.686548	0.826941	0.368886	0.777161	0.313452
SIG_INSULIN_RECEPTOR_PATHWAY_IN_CARDIAC_MYOCYTES	51	1586	614	0.68607	0.811788	0.134001	0.667474	0.31393
REACTOME_BINDING_OF_TCF_LEF:CTNNB1_TO_TARGET_GENE_PROMOTERS	8	1585	615	0.686014	0.688833	0.341299	0.841757	0.313986
REACTOME_SMAD2_SMAD3:SMAD4_HETEROTRIMER_REGULATES_TRANSCRIPTION	32	1584	616	0.68588	0.0922588	0.0776322	0.639916	0.31412
REACTOME_PEROXISOMAL_PROTEIN_IMPORT	63	1583	617	0.68567	0.878635	0.116348	0.524139	0.31433
REACTOME_APC_C:CDC20_MEDIATED_DEGRADATION_OF_CYCLIN_B	23	1582	618	0.685391	0.833668	0.195752	0.685521	0.314609
REACTOME_ENERGY_DEPENDENT_REGULATION_OF_MTOR_BY_LKB1_AMPK	28	1581	619	0.685114	0.748331	0.142412	0.718242	0.314886
REACTOME_PYRUVATE_METABOLISM	31	1580	620	0.684977	0.737609	0.109359	0.393534	0.315023
PID_S1P_S1P2_PATHWAY	24	1579	621	0.683396	0.500986	0.105783	0.435451	0.316604
BIOCARTA_CARM_ER_PATHWAY	26	1578	622	0.683261	0.853942	0.392822	0.80807	0.316739
REACTOME_CHYLOMICRON_REMODELING	10	1577	623	0.683025	0.344303	0.336653	0.366351	0.316975
REACTOME_ATTACHMENT_OF_GPI_ANCHOR_TO_UPAR	7	1576	624	0.68249	0.203065	0.111095	0.209047	0.31751
REACTOME_VLDL_ASSEMBLY	5	1575	625	0.682421	0.823751	0.451561	0.544107	0.317579
PID_CDC42_REG_PATHWAY	30	1574	626	0.681697	0.700219	0.182679	0.836811	0.318303
KEGG_DRUG_METABOLISM_CYTOCHROME_P450	72	1573	627	0.681237	0.3501	0.188795	0.590815	0.318763
KEGG_GALACTOSE_METABOLISM	26	1572	628	0.680771	0.85928	0.221203	0.383324	0.319229
REACTOME_DOWNSTREAM_SIGNALING_OF_ACTIVATED_FGFR4	27	1571	629	0.68056	0.498386	0.197816	0.793221	0.31944
BIOCARTA_HSWI_SNF_PATHWAY	12	1570	630	0.680227	0.879615	0.452267	0.792031	0.319773
REACTOME_METABOLISM_OF_NON_CODING_RNA	53	1569	631	0.680169	0.855852	0.173018	0.849067	0.319831
KEGG_ALZHEIMERS_DISEASE	151	1568	632	0.679975	0.816163	0.110805	0.797642	0.320025
REACTOME_TRANSCRIPTION_OF_E2F_TARGETS_UNDER_NEGATIVE_CONTROL_BY_DREAM_COMPLEX	19	1567	633	0.679757	0.759974	0.190821	0.665738	0.320243
REACTOME_SUMO_IS_CONJUGATED_TO_E1_UBA2:SAE1	5	1566	634	0.679686	0.836837	0.370855	0.713745	0.320314
REACTOME_FGFR1C_LIGAND_BINDING_AND_ACTIVATION	11	1565	635	0.679505	0.540843	0.335035	0.498134	0.320495
BIOCARTA_NOS1_PATHWAY	21	1564	636	0.679356	0.624037	0.211127	0.860084	0.320644
REACTOME_METABOLISM_OF_PORPHYRINS	16	1563	637	0.678625	0.427201	0.199862	0.560329	0.321375
PID_HIF2PATHWAY	32	1562	638	0.678022	0.421636	0.0914769	0.877821	0.321978
REACTOME_TRANSPORT_OF_THE_SLBP_DEPENDANT_MATURE_MRNA	35	1561	639	0.677811	0.885335	0.266275	0.825432	0.322189
KEGG_FATTY_ACID_METABOLISM	42	1560	640	0.677672	0.569237	0.0964577	0.749404	0.322328
REACTOME_N_GLYCAN_ANTENNAE_ELONGATION	15	1559	641	0.677542	0.922528	0.282942	0.792321	0.322458
REACTOME_REGULATION_OF_GENE_EXPRESSION_IN_LATE_STAGE_BRANCHING_MORPHOGENESIS_PANCREATIC_BUD_PRECURSOR_CELLS	16	1558	642	0.677334	0.685106	0.272357	0.816764	0.322666
PID_WNT_SIGNALING_PATHWAY	28	1557	643	0.677043	0.421564	0.0718525	0.619637	0.322957
BIOCARTA_CHREBP_PATHWAY	19	1556	644	0.675778	0.843279	0.387968	0.918054	0.324222
REACTOME_SYNTHESIS_OF_PROSTAGLANDINS_PG_AND_THROMBOXANES_TX	14	1555	645	0.675339	0.352346	0.125354	0.489053	0.324661
BIOCARTA_SHH_PATHWAY	16	1554	646	0.675276	0.899502	0.321927	0.862466	0.324724
REACTOME_CGMP_EFFECTS	16	1553	647	0.674974	0.817332	0.0909178	0.637233	0.325026
BIOCARTA_P53_PATHWAY	16	1552	648	0.674363	0.710834	0.304225	0.822881	0.325637
REACTOME_LIGAND_RECEPTOR_INTERACTIONS	8	1551	649	0.6743	0.574346	0.131407	0.433566	0.3257
REACTOME_SIGNALLING_TO_P38_VIA_RIT_AND_RIN	5	1550	650	0.673931	0.250985	0.233195	0.421368	0.326069
REACTOME_RRNA_MODIFICATION_IN_THE_NUCLEUS_AND_CYTOSOL	55	1549	651	0.673584	0.711026	0.108023	0.648433	0.326416
REACTOME_REGULATION_OF_GENE_EXPRESSION_IN_BETA_CELLS	21	1548	652	0.673301	0.382136	0.324172	0.58978	0.326699
REACTOME_LRR_FLII_INTERACTING_PROTEIN_1_LRRFIP1_ACTIVATES_TYPE_I_IFN_PRODUCTION	5	1547	653	0.673066	0.681648	0.407691	0.872053	0.326934
REACTOME_ACROSOME_REACTION_AND_SPERM:OOCYTE_MEMBRANE_BINDING	6	1546	654	0.671282	0.642353	0.2306	0.116449	0.328718
BIOCARTA_LDL_PATHWAY	6	1545	655	0.671191	0.30282	0.140238	0.269419	0.328809
REACTOME_SYNTHESIS_OF_PIPS_AT_THE_LATE_ENDOSOME_MEMBRANE	11	1544	656	0.67071	0.527668	0.164788	0.652072	0.32929
KEGG_GLYCOSAMINOGLYCAN_DEGRADATION	21	1543	657	0.670704	0.793397	0.157307	0.636861	0.329296
REACTOME_HYALURONAN_UPTAKE_AND_DEGRADATION	12	1542	658	0.670583	0.859961	0.27432	0.825141	0.329417
BIOCARTA_WNT_PATHWAY	24	1541	659	0.670402	0.569981	0.153006	0.846441	0.329598
REACTOME_ESTROGEN_DEPENDENT_NUCLEAR_EVENTS_DOWNSTREAM_OF_ESR_MEMBRANE_SIGNALING	24	1540	660	0.67007	0.485683	0.128489	0.684449	0.32993
REACTOME_PTK6_REGULATES_CELL_CYCLE	6	1539	661	0.669857	0.896392	0.366267	0.711811	0.330143
REACTOME_REGULATION_OF_TP53_ACTIVITY_THROUGH_PHOSPHORYLATION	91	1538	662	0.669586	0.797062	0.109839	0.785838	0.330414
REACTOME_UPTAKE_AND_FUNCTION_OF_ANTHRAX_TOXINS	11	1537	663	0.666977	0.848252	0.416123	0.834736	0.333023
PID_FOXO_PATHWAY	49	1536	664	0.666974	0.686011	0.112453	0.776568	0.333026
REACTOME_ADENYLATE_CYCLASE_INHIBITORY_PATHWAY	14	1535	665	0.666809	0.493138	0.118536	0.388065	0.333191
REACTOME_DNA_REPAIR	319	1534	666	0.66675	0.843145	0.0288246	0.738682	0.33325
PID_WNT_NONCANONICAL_PATHWAY	32	1533	667	0.666397	0.835243	0.144624	0.530824	0.333603
REACTOME_CELL_EXTRACELLULAR_MATRIX_INTERACTIONS	18	1532	668	0.666087	0.676151	0.1442	0.541592	0.333913
KEGG_RNA_POLYMERASE	29	1531	669	0.665604	0.792733	0.13843	0.644755	0.334396
REACTOME_RNA_POLYMERASE_I_TRANSCRIPTION_TERMINATION	30	1530	670	0.665394	0.681044	0.117902	0.503993	0.334606
REACTOME_CHYLOMICRON_ASSEMBLY	10	1529	671	0.663866	0.706559	0.384806	0.489719	0.336134
KEGG_GLYCINE_SERINE_AND_THREONINE_METABOLISM	31	1528	672	0.663621	0.700004	0.104067	0.718848	0.336379
REACTOME_DEGRADATION_OF_GLI1_BY_THE_PROTEASOME	59	1527	673	0.662817	0.780115	0.169075	0.851266	0.337183
PID_IGF1_PATHWAY	28	1526	674	0.662674	0.678819	0.182657	0.775982	0.337326
PID_CXCR3_PATHWAY	43	1525	675	0.662318	0.289983	0.0357952	0.434133	0.337682
REACTOME_POST_TRANSLATIONAL_PROTEIN_MODIFICATION	1390	1524	676	0.662151	0.680101	0.00937351	0.812731	0.337849
REACTOME_ACTIVATION_OF_PPARGC1A_PGC_1ALPHA_BY_PHOSPHORYLATION	10	1523	677	0.66212	0.354019	0.301107	0.840994	0.33788
REACTOME_CIRCADIAN_CLOCK	68	1522	678	0.661756	0.383657	0.0427571	0.522226	0.338244
REACTOME_FBXL7_DOWN_REGULATES_AURKA_DURING_MITOTIC_ENTRY_AND_IN_EARLY_MITOSIS	54	1521	679	0.661587	0.767777	0.148971	0.797758	0.338413
REACTOME_G2_PHASE	5	1520	680	0.661158	0.713908	0.548251	0.888497	0.338842
REACTOME_INTERLEUKIN_17_SIGNALING	71	1519	681	0.661093	0.825663	0.151507	0.810739	0.338907
REACTOME_ACTIVATED_NTRK2_SIGNALS_THROUGH_CDK5	6	1518	682	0.660941	0.743331	0.29859	0.548145	0.339059
REACTOME_MTORC1_MEDIATED_SIGNALLING	22	1517	683	0.659507	0.720602	0.108102	0.343798	0.340493
WNT_SIGNALING	86	1516	684	0.659506	0.492839	0.00387834	0.638005	0.340494
REACTOME_INTEGRATION_OF_PROVIRUS	9	1515	685	0.659221	0.645308	0.320041	0.825963	0.340779
REACTOME_MAPK_TARGETS_NUCLEAR_EVENTS_MEDIATED_BY_MAP_KINASES	31	1514	686	0.658845	0.746514	0.134261	0.65947	0.341155
REACTOME_SIGNALING_BY_RAS_MUTANTS	58	1513	687	0.658617	0.959272	0.014144	0.472257	0.341383
REACTOME_RORA_ACTIVATES_GENE_EXPRESSION	18	1512	688	0.65855	0.782038	0.198666	0.524301	0.34145
REACTOME_ASSEMBLY_OF_THE_HIV_VIRION	16	1511	689	0.658387	0.838533	0.40581	0.847135	0.341613
REACTOME_TCF_DEPENDENT_SIGNALING_IN_RESPONSE_TO_WNT	231	1510	690	0.658352	0.897152	0.0536749	0.905602	0.341648
REACTOME_MISSPLICED_LRP5_MUTANTS_HAVE_ENHANCED_BETA_CATENIN_DEPENDENT_SIGNALING	6	1509	691	0.657828	0.710121	0.786579	0.957829	0.342172
REACTOME_DEFECTIVE_GALNT3_CAUSES_FAMILIAL_HYPERPHOSPHATEMIC_TUMORAL_CALCINOSIS_HFTC	16	1508	692	0.657428	0.545895	0.469649	0.61973	0.342572
BIOCARTA_AKAP95_PATHWAY	11	1507	693	0.657039	0.813739	0.456891	0.898848	0.342961
KEGG_VALINE_LEUCINE_AND_ISOLEUCINE_BIOSYNTHESIS	11	1506	694	0.656842	0.767929	0.187001	0.404591	0.343158
REACTOME_CA_DEPENDENT_EVENTS	35	1505	695	0.656039	0.657935	0.0433814	0.673379	0.343961
BIOCARTA_RNAPOL3_PATHWAY	7	1504	696	0.655713	0.81444	0.400551	0.870956	0.344287
SA_G1_AND_S_PHASES	15	1503	697	0.655263	0.896879	0.314765	0.852896	0.344737
REACTOME_SHC_MEDIATED_CASCADE:FGFR1	21	1502	698	0.655258	0.225074	0.111694	0.761078	0.344742
REACTOME_DEGRADATION_OF_DVL	56	1501	699	0.654886	0.678729	0.0897281	0.426467	0.345114
KEGG_GLYCOLYSIS_GLUCONEOGENESIS	62	1500	700	0.654473	0.37832	0.0339528	0.731583	0.345527
BIOCARTA_PELP1_PATHWAY	6	1499	701	0.654406	0.897014	0.53212	0.931321	0.345594
REACTOME_ACTIVATION_OF_NMDA_RECEPTORS_AND_POSTSYNAPTIC_EVENTS	92	1498	702	0.654035	0.79798	0.0895319	0.912239	0.345965
REACTOME_CREB3_FACTORS_ACTIVATE_GENES	9	1497	703	0.653931	0.684764	0.338003	0.753906	0.346069
REACTOME_CONJUGATION_OF_BENZOATE_WITH_GLYCINE	6	1496	704	0.653904	0.717011	0.76982	0.84999	0.346096
REACTOME_HIGHLY_CALCIUM_PERMEABLE_NICOTINIC_ACETYLCHOLINE_RECEPTORS	9	1495	705	0.653643	0.812672	0.491758	0.515201	0.346357
REACTOME_DNA_DAMAGE_BYPASS	46	1494	706	0.652554	0.828583	0.120877	0.526223	0.347446
BIOCARTA_CARM1_PATHWAY	12	1493	707	0.652346	0.759732	0.386583	0.901807	0.347654
REACTOME_APC_C:CDH1_MEDIATED_DEGRADATION_OF_CDC20_AND_OTHER_APC_C:CDH1_TARGETED_PROTEINS_IN_LATE_MITOSIS_EARLY_G1	71	1492	708	0.652102	0.859956	0.102307	0.723252	0.347898
REACTOME_ZINC_EFFLUX_AND_COMPARTMENTALIZATION_BY_THE_SLC30_FAMILY	7	1491	709	0.651885	0.774944	0.162589	0.320972	0.348115
PID_ATR_PATHWAY	39	1490	710	0.651689	0.76023	0.147697	0.858212	0.348311
REACTOME_METHIONINE_SALVAGE_PATHWAY	6	1489	711	0.651288	0.611383	0.415374	0.94674	0.348712
REACTOME_SUMOYLATION_OF_SUMOYLATION_PROTEINS	34	1488	712	0.651013	0.868027	0.295394	0.855817	0.348987
REACTOME_TRANSFERRIN_ENDOCYTOSIS_AND_RECYCLING	31	1487	713	0.650595	0.781406	0.0595568	0.180985	0.349405
REACTOME_DISEASES_ASSOCIATED_WITH_VISUAL_TRANSDUCTION	13	1486	714	0.65056	0.855304	0.38431	0.791081	0.34944
BIOCARTA_HCMV_PATHWAY	17	1485	715	0.650522	0.663624	0.204927	0.74991	0.349478
REACTOME_DEADENYLATION_OF_MRNA	21	1484	716	0.650506	0.860456	0.206377	0.32173	0.349494
REACTOME_THE_ACTIVATION_OF_ARYLSULFATASES	13	1483	717	0.650172	0.851267	0.258124	0.752247	0.349828
REACTOME_PHOSPHORYLATION_SITE_MUTANTS_OF_CTNNB1_ARE_NOT_TARGETED_TO_THE_PROTEASOME_BY_THE_DESTRUCTION_COMPLEX	15	1482	718	0.649728	0.692315	0.278085	0.802509	0.350272
REACTOME_ACTIVATED_TAK1_MEDIATES_P38_MAPK_ACTIVATION	23	1481	719	0.649303	0.775542	0.20173	0.800352	0.350697
BIOCARTA_SALMONELLA_PATHWAY	5	1480	720	0.649228	0.806783	0.381225	0.751548	0.350772
SA_PROGRAMMED_CELL_DEATH	12	1479	721	0.649197	0.809579	0.285757	0.636789	0.350803
REACTOME_TRANSPORT_OF_VITAMINS_NUCLEOSIDES_AND_RELATED_MOLECULES	44	1478	722	0.648965	0.267601	0.0392979	0.538308	0.351035
REACTOME_ACTIVATED_NTRK2_SIGNALS_THROUGH_RAS	9	1477	723	0.648571	0.368826	0.170477	0.66731	0.351429
KEGG_OTHER_GLYCAN_DEGRADATION	16	1476	724	0.648402	0.854191	0.260674	0.572137	0.351598
BIOCARTA_AKAP13_PATHWAY	11	1475	725	0.647678	0.424356	0.348613	0.90142	0.352322
REACTOME_MITOCHONDRIAL_FATTY_ACID_BETA_OXIDATION_OF_UNSATURATED_FATTY_ACIDS	6	1474	726	0.647463	0.643855	0.369675	0.859018	0.352537
REACTOME_DISEASES_OF_SIGNAL_TRANSDUCTION	382	1473	727	0.647381	0.910492	0.0182576	0.935313	0.352619
REACTOME_FANCONI_ANEMIA_PATHWAY	34	1472	728	0.647251	0.565826	0.0674379	0.572193	0.352749
KEGG_GLYCOSPHINGOLIPID_BIOSYNTHESIS_LACTO_AND_NEOLACTO_SERIES	25	1471	729	0.646871	0.525901	0.183906	0.69971	0.353129
REACTOME_SODIUM_COUPLED_PHOSPHATE_COTRANSPORTERS	5	1470	730	0.646668	0.856606	0.838221	0.764068	0.353332
REACTOME_DOPAMINE_NEUROTRANSMITTER_RELEASE_CYCLE	22	1469	731	0.646533	0.332941	0.0322474	0.2235	0.353467
REACTOME_SYNTHESIS_OF_PG	8	1468	732	0.6463	0.340773	0.200314	0.549946	0.3537
REACTOME_SUMOYLATION_OF_CHROMATIN_ORGANIZATION_PROTEINS	70	1467	733	0.646076	0.926239	0.279224	0.914753	0.353924
REACTOME_RHO_GTPASES_ACTIVATE_KTN1	11	1466	734	0.645771	0.794642	0.243289	0.518328	0.354229
SIG_CHEMOTAXIS	44	1465	735	0.64514	0.87853	0.160349	0.763204	0.35486
REACTOME_CLEC7A_DECTIN_1_INDUCES_NFAT_ACTIVATION	11	1464	736	0.644883	0.813798	0.344071	0.746028	0.355117
REACTOME_DISEASES_ASSOCIATED_WITH_O_GLYCOSYLATION_OF_PROTEINS	65	1463	737	0.644871	0.28069	0.0044586	0.114825	0.355129
REACTOME_CREB1_PHOSPHORYLATION_THROUGH_THE_ACTIVATION_OF_CAMKII_CAMKK_CAMKIV_CASCASDE	8	1462	738	0.644604	0.677716	0.23604	0.502199	0.355396
REACTOME_SYNTHESIS_OF_BILE_ACIDS_AND_BILE_SALTS_VIA_7ALPHA_HYDROXYCHOLESTEROL	24	1461	739	0.644518	0.624537	0.0435342	0.0340658	0.355482
PID_PLK1_PATHWAY	43	1460	740	0.643482	0.86849	0.139694	0.693193	0.356518
KEGG_RNA_DEGRADATION	54	1459	741	0.643217	0.672366	0.0616693	0.587427	0.356783
REACTOME_MAPK6_MAPK4_SIGNALING	92	1458	742	0.64302	0.834766	0.108688	0.9271	0.35698
BIOCARTA_HDAC_PATHWAY	25	1457	743	0.642481	0.648916	0.175747	0.720541	0.357519
REACTOME_SYNAPTIC_ADHESION_LIKE_MOLECULES	21	1456	744	0.640926	0.834008	0.233915	0.810101	0.359074
REACTOME_CASPASE_MEDIATED_CLEAVAGE_OF_CYTOSKELETAL_PROTEINS	12	1455	745	0.640542	0.870265	0.241196	0.483789	0.359458
REACTOME_GLYCOSPHINGOLIPID_METABOLISM	44	1454	746	0.640463	0.904452	0.316162	0.792671	0.359537
KEGG_LYSINE_DEGRADATION	39	1453	747	0.639799	0.780032	0.106566	0.656482	0.360201
BIOCARTA_CERAMIDE_PATHWAY	21	1452	748	0.639483	0.852488	0.333346	0.770294	0.360517
REACTOME_EXPORT_OF_VIRAL_RIBONUCLEOPROTEINS_FROM_NUCLEUS	32	1451	749	0.639468	0.854206	0.23615	0.785828	0.360532
REACTOME_RAF_ACTIVATION	30	1450	750	0.639283	0.708034	0.151252	0.757422	0.360717
PID_MYC_PATHWAY	25	1449	751	0.639156	0.662151	0.218809	0.868255	0.360844
REACTOME_PHENYLALANINE_METABOLISM	5	1448	752	0.638555	0.496092	0.228831	0.158548	0.361445
REACTOME_ALPHA_LINOLENIC_OMEGA3_AND_LINOLEIC_OMEGA6_ACID_METABOLISM	13	1447	753	0.638198	0.730669	0.244889	0.679525	0.361802
KEGG_COLORECTAL_CANCER	62	1446	754	0.638169	0.520949	0.0528242	0.767256	0.361831
KEGG_ASCORBATE_AND_ALDARATE_METABOLISM	25	1445	755	0.638054	0.286576	0.526404	0.630334	0.361946
KEGG_ARGININE_AND_PROLINE_METABOLISM	52	1444	756	0.637078	0.459214	0.0159304	0.673258	0.362922
PID_ALK2_PATHWAY	11	1443	757	0.637061	0.578822	0.280059	0.710133	0.362939
BIOCARTA_CDK5_PATHWAY	13	1442	758	0.636966	0.839278	0.252769	0.758414	0.363034
BIOCARTA_MYOSIN_PATHWAY	11	1441	759	0.635883	0.326504	0.175945	0.796143	0.364117
REACTOME_REGULATION_OF_LIPID_METABOLISM_BY_PEROXISOME_PROLIFERATOR_ACTIVATED_RECEPTOR_ALPHA_PPARALPHA	119	1440	760	0.635855	0.458308	0.0368451	0.183313	0.364145
REACTOME_MRNA_DECAY_BY_3_TO_5_EXORIBONUCLEASE	16	1439	761	0.635827	0.683771	0.174224	0.670221	0.364173
PID_VEGFR1_2_PATHWAY	69	1438	762	0.635578	0.663911	0.0401488	0.815836	0.364422
REACTOME_COOPERATION_OF_PREFOLDIN_AND_TRIC_CCT_IN_ACTIN_AND_TUBULIN_FOLDING	33	1437	763	0.634722	0.636177	0.158236	0.687941	0.365278
REACTOME_TRANSPORT_OF_FATTY_ACIDS	8	1436	764	0.63468	0.696029	0.545012	0.743264	0.36532
BIOCARTA_CPSF_PATHWAY	10	1435	765	0.63465	0.579877	0.348944	0.801918	0.36535
REACTOME_SIGNALING_BY_FGFR4_IN_DISEASE	11	1434	766	0.634354	0.580443	0.221871	0.770138	0.365646
BIOCARTA_FMLP_PATHWAY	34	1433	767	0.634103	0.788435	0.236359	0.875782	0.365897
REACTOME_S_PHASE	159	1432	768	0.634086	0.88727	0.055419	0.745046	0.365914
BIOCARTA_UCALPAIN_PATHWAY	14	1431	769	0.633838	0.57002	0.0752929	0.259942	0.366162
BIOCARTA_PTEN_PATHWAY	18	1430	770	0.63376	0.380241	0.077837	0.817061	0.36624
REACTOME_SUMOYLATION_OF_DNA_DAMAGE_RESPONSE_AND_REPAIR_PROTEINS	75	1429	771	0.633686	0.815694	0.0969984	0.823928	0.366314
BIOCARTA_ERBB3_PATHWAY	5	1428	772	0.633019	0.516222	0.185251	0.449654	0.366981
REACTOME_REVERSIBLE_HYDRATION_OF_CARBON_DIOXIDE	12	1427	773	0.632432	0.636113	0.237918	0.525559	0.367568
REACTOME_PHOSPHOLIPASE_C_MEDIATED_CASCADE_FGFR4	15	1426	774	0.632064	0.614663	0.479863	0.779543	0.367936
REACTOME_G0_AND_EARLY_G1	27	1425	775	0.63193	0.784084	0.251107	0.732641	0.36807
REACTOME_NEGATIVE_REGULATION_OF_NOTCH4_SIGNALING	53	1424	776	0.63086	0.765221	0.142273	0.854611	0.36914
REACTOME_RECOGNITION_OF_DNA_DAMAGE_BY_PCNA_CONTAINING_REPLICATION_COMPLEX	30	1423	777	0.63066	0.791149	0.160152	0.609592	0.36934
REACTOME_SWITCHING_OF_ORIGINS_TO_A_POST_REPLICATIVE_STATE	89	1422	778	0.630399	0.885042	0.112539	0.740746	0.369601
REACTOME_GLUTAMATE_NEUROTRANSMITTER_RELEASE_CYCLE	23	1421	779	0.629643	0.378679	0.0296211	0.416751	0.370357
REACTOME_BETA_CATENIN_PHOSPHORYLATION_CASCADE	17	1420	780	0.629363	0.593373	0.217173	0.769354	0.370637
REACTOME_APOBEC3G_MEDIATED_RESISTANCE_TO_HIV_1_INFECTION	5	1419	781	0.629112	0.387516	0.347935	0.816046	0.370888
REACTOME_HDR_THROUGH_SINGLE_STRAND_ANNEALING_SSA	36	1418	782	0.62892	0.835269	0.152552	0.599646	0.37108
REACTOME_NITRIC_OXIDE_STIMULATES_GUANYLATE_CYCLASE	20	1417	783	0.628913	0.840707	0.0599836	0.62026	0.371087
KEGG_LINOLEIC_ACID_METABOLISM	29	1416	784	0.627712	0.0419357	0.0594087	0.209912	0.372288
BIOCARTA_SKP2E2F_PATHWAY	10	1415	785	0.626654	0.656805	0.424293	0.827223	0.373346
REACTOME_CALCINEURIN_ACTIVATES_NFAT	9	1414	786	0.626202	0.770886	0.320816	0.741429	0.373798
REACTOME_ACTIVATED_NTRK2_SIGNALS_THROUGH_FYN	7	1413	787	0.626047	0.494725	0.257201	0.806974	0.373953
REACTOME_NEGATIVE_REGULATION_OF_FGFR1_SIGNALING	32	1412	788	0.625973	0.268952	0.0604567	0.743384	0.374027
REACTOME_INTRINSIC_PATHWAY_FOR_APOPTOSIS	51	1411	789	0.625575	0.831276	0.124208	0.766348	0.374425
REACTOME_CASPASE_ACTIVATION_VIA_DEPENDENCE_RECEPTORS_IN_THE_ABSENCE_OF_LIGAND	10	1410	790	0.624679	0.556897	0.301177	0.806162	0.375321
REACTOME_REGULATION_OF_PYRUVATE_DEHYDROGENASE_PDH_COMPLEX	16	1409	791	0.624055	0.64101	0.088034	0.158118	0.375945
REACTOME_RESOLUTION_OF_D_LOOP_STRUCTURES	33	1408	792	0.622571	0.871445	0.182323	0.497899	0.377429
REACTOME_REGULATION_OF_RAS_BY_GAPS	67	1407	793	0.622114	0.740848	0.0961452	0.769535	0.377886
REACTOME_DERMATAN_SULFATE_BIOSYNTHESIS	11	1406	794	0.62184	0.534107	0.259849	0.839111	0.37816
KEGG_PENTOSE_AND_GLUCURONATE_INTERCONVERSIONS	27	1405	795	0.621779	0.797847	0.570418	0.78794	0.378221
REACTOME_REGULATION_OF_FOXO_TRANSCRIPTIONAL_ACTIVITY_BY_ACETYLATION	10	1404	796	0.621709	0.414874	0.220399	0.781111	0.378291
BIOCARTA_TUBBY_PATHWAY	5	1403	797	0.62142	0.408265	0.223857	0.397782	0.37858
BIOCARTA_ERK_PATHWAY	27	1402	798	0.620719	0.671183	0.175269	0.774051	0.379281
BIOCARTA_SPRY_PATHWAY	17	1401	799	0.620445	0.635231	0.161203	0.433525	0.379555
REACTOME_METABOLIC_DISORDERS_OF_BIOLOGICAL_OXIDATION_ENZYMES	35	1400	800	0.620303	0.103388	0.0252307	0.280814	0.379697
REACTOME_REELIN_SIGNALLING_PATHWAY	5	1399	801	0.620298	0.867267	0.407937	0.685649	0.379702
REACTOME_REGULATION_OF_GENE_EXPRESSION_BY_HYPOXIA_INDUCIBLE_FACTOR	11	1398	802	0.619642	0.514779	0.35498	0.867773	0.380358
REACTOME_INTERCONVERSION_OF_NUCLEOTIDE_DI_AND_TRIPHOSPHATES	28	1397	803	0.619504	0.7701	0.210109	0.712387	0.380496
REACTOME_DEFECTIVE_C1GALT1C1_CAUSES_TN_POLYAGGLUTINATION_SYNDROME_TNPS	17	1396	804	0.619096	0.755625	0.453447	0.448251	0.380904
PID_ATM_PATHWAY	31	1395	805	0.618888	0.817042	0.252287	0.812313	0.381112
KEGG_CELL_CYCLE	124	1394	806	0.618614	0.833368	0.0215231	0.629976	0.381386
KEGG_PHENYLALANINE_METABOLISM	17	1393	807	0.618268	0.466793	0.193887	0.582514	0.381732
REACTOME_SHC1_EVENTS_IN_ERBB2_SIGNALING	22	1392	808	0.618233	0.365099	0.0875333	0.760339	0.381767
KEGG_SULFUR_METABOLISM	13	1391	809	0.617833	0.473201	0.178266	0.306076	0.382167
BIOCARTA_ION_PATHWAY	5	1390	810	0.617649	0.245585	0.122398	0.255316	0.382351
BIOCARTA_AMI_PATHWAY	20	1389	811	0.617204	0.463368	0.0256994	0.145314	0.382796
REACTOME_NOSTRIN_MEDIATED_ENOS_TRAFFICKING	5	1388	812	0.61404	0.618345	0.321024	0.654306	0.38596
PID_ERBB1_INTERNALIZATION_PATHWAY	41	1387	813	0.613741	0.431643	0.0654463	0.648634	0.386259
REACTOME_TP53_REGULATES_TRANSCRIPTION_OF_SEVERAL_ADDITIONAL_CELL_DEATH_GENES_WHOSE_SPECIFIC_ROLES_IN_P53_DEPENDENT_APOPTOSIS_REMAIN_UNCERTAIN	14	1386	814	0.613436	0.563501	0.08137	0.548267	0.386564
BIOCARTA_ETC_PATHWAY	9	1385	815	0.613288	0.603632	0.314024	0.763454	0.386712
REACTOME_DEFECTIVE_B4GALT7_CAUSES_EDS_PROGEROID_TYPE	20	1384	816	0.612899	0.465805	0.147914	0.835729	0.387101
REACTOME_EICOSANOIDS	12	1383	817	0.612581	0.328005	0.272192	0.458269	0.387419
BIOCARTA_NPC_PATHWAY	11	1382	818	0.612574	0.332868	0.162498	0.777858	0.387426
REACTOME_P75NTR_RECRUITS_SIGNALLING_COMPLEXES	13	1381	819	0.61185	0.716186	0.317637	0.8036	0.38815
REACTOME_TRNA_PROCESSING	105	1380	820	0.611823	0.572952	0.0895415	0.877762	0.388177
REACTOME_TETRAHYDROBIOPTERIN_BH4_SYNTHESIS_RECYCLING_SALVAGE_AND_REGULATION	10	1379	821	0.611796	0.749341	0.211295	0.660413	0.388204
REACTOME_SYNTHESIS_OF_BILE_ACIDS_AND_BILE_SALTS_VIA_27_HYDROXYCHOLESTEROL	15	1378	822	0.611673	0.56286	0.119639	0.0471933	0.388327
BIOCARTA_RANBP2_PATHWAY	11	1377	823	0.611592	0.631067	0.229603	0.65359	0.388408
REACTOME_POLB_DEPENDENT_LONG_PATCH_BASE_EXCISION_REPAIR	8	1376	824	0.611275	0.665791	0.261235	0.603367	0.388725
REACTOME_MISMATCH_REPAIR	15	1375	825	0.610479	0.649201	0.140098	0.230272	0.389521
REACTOME_REGULATION_OF_TP53_ACTIVITY_THROUGH_METHYLATION	18	1374	826	0.609136	0.728418	0.187288	0.422063	0.390864
REACTOME_PHOSPHOLIPID_METABOLISM	199	1373	827	0.60907	0.0905887	0.00318227	0.544956	0.39093
REACTOME_REGULATION_OF_RUNX1_EXPRESSION_AND_ACTIVITY	17	1372	828	0.608985	0.209494	0.141384	0.645888	0.391015
REACTOME_FRS2_MEDIATED_ACTIVATION	10	1371	829	0.608789	0.744013	0.204565	0.56289	0.391211
REACTOME_RHO_GTPASES_ACTIVATE_WASPS_AND_WAVES	36	1370	830	0.60828	0.465742	0.141686	0.852635	0.39172
REACTOME_FBXW7_MUTANTS_AND_NOTCH1_IN_CANCER	5	1369	831	0.607254	0.481544	0.377618	0.828515	0.392746
REACTOME_TRANSLESION_SYNTHESIS_BY_POLK	17	1368	832	0.607108	0.823259	0.213429	0.365329	0.392892
REACTOME_TP53_REGULATES_TRANSCRIPTION_OF_DNA_REPAIR_GENES	58	1367	833	0.606848	0.726916	0.10578	0.646356	0.393152
REACTOME_SCAVENGING_BY_CLASS_B_RECEPTORS	6	1366	834	0.606575	0.397054	0.120761	0.25557	0.393425
REACTOME_REGULATION_OF_CYTOSKELETAL_REMODELING_AND_CELL_SPREADING_BY_IPP_COMPLEX_COMPONENTS	8	1365	835	0.606447	0.492028	0.169398	0.248401	0.393553
REACTOME_DISEASES_ASSOCIATED_WITH_SURFACTANT_METABOLISM	10	1364	836	0.606121	0.661017	0.41713	0.213939	0.393879
REACTOME_HDR_THROUGH_MMEJ_ALT_NHEJ	9	1363	837	0.605665	0.736885	0.242625	0.5305	0.394335
REACTOME_TRANSCRIPTIONAL_ACTIVITY_OF_SMAD2_SMAD3:SMAD4_HETEROTRIMER	44	1362	838	0.603283	0.217897	0.0810891	0.857905	0.396717
REACTOME_ADENYLATE_CYCLASE_ACTIVATING_PATHWAY	10	1361	839	0.602162	0.499348	0.111342	0.454241	0.397838
REACTOME_GASTRIN_CREB_SIGNALLING_PATHWAY_VIA_PKC_AND_MAPK	18	1360	840	0.601664	0.516467	0.169265	0.620623	0.398336
REACTOME_PHOSPHOLIPASE_C_MEDIATED_CASCADE_FGFR2	18	1359	841	0.6013	0.498152	0.328977	0.844077	0.3987
REACTOME_ABACAVIR_METABOLISM	5	1358	842	0.600258	0.846153	0.4522	0.287382	0.399742
REACTOME_DISEASE	1056	1357	843	0.59526	0.700692	0.0029416	1	0.40474
BIOCARTA_FIBRINOLYSIS_PATHWAY	12	1356	844	0.595249	0.118003	0.0193195	0.0412541	0.404751
REACTOME_GENERIC_TRANSCRIPTION_PATHWAY	1191	1355	845	0.590816	0.306679	0.00163332	0.766273	0.409184
REACTOME_CELL_CYCLE_MITOTIC	525	1354	846	0.589649	0.815871	0.018145	0.82462	0.410351
REACTOME_NOTCH_HLH_TRANSCRIPTION_PATHWAY	28	1353	847	0.587621	0.67257	0.177341	0.753848	0.412379
PID_TGFBR_PATHWAY	53	1352	848	0.583017	0.804603	0.0791789	0.730058	0.416983
REACTOME_CDK_MEDIATED_PHOSPHORYLATION_AND_REMOVAL_OF_CDC6	71	1351	849	0.582681	0.775656	0.0860838	0.691147	0.417319
KEGG_MELANOMA	71	1350	850	0.581378	0.582848	0.033529	0.753537	0.418622
REACTOME_SIGNALING_BY_FGFR1_IN_DISEASE	38	1349	851	0.579912	0.744273	0.276185	0.764426	0.420088
KEGG_SELENOAMINO_ACID_METABOLISM	25	1348	852	0.579832	0.629398	0.0906317	0.477193	0.420168
REACTOME_MAPK1_ERK2_ACTIVATION	9	1347	853	0.578908	0.55204	0.216334	0.863247	0.421092
BIOCARTA_FBW7_PATHWAY	9	1346	854	0.576246	0.61406	0.378481	0.802263	0.423754
REACTOME_PI5P_REGULATES_TP53_ACETYLATION	8	1345	855	0.575477	0.659718	0.204615	0.225367	0.424523
REACTOME_DISEASES_ASSOCIATED_WITH_N_GLYCOSYLATION_OF_PROTEINS	17	1344	856	0.574787	0.562972	0.173715	0.534081	0.425213
KEGG_NICOTINATE_AND_NICOTINAMIDE_METABOLISM	24	1343	857	0.573552	0.711648	0.173342	0.788077	0.426448
REACTOME_RESOLUTION_OF_D_LOOP_STRUCTURES_THROUGH_SYNTHESIS_DEPENDENT_STRAND_ANNEALING_SDSA	25	1342	858	0.572794	0.802479	0.141317	0.4282	0.427206
REACTOME_SYNTHESIS_OF_PC	28	1341	859	0.572584	0.359947	0.107436	0.730302	0.427416
REACTOME_DEGRADATION_OF_CYSTEINE_AND_HOMOCYSTEINE	13	1340	860	0.571832	0.753582	0.207894	0.560712	0.428168
REACTOME_PEROXISOMAL_LIPID_METABOLISM	29	1339	861	0.571692	0.720944	0.126471	0.630894	0.428308
REACTOME_CREB1_PHOSPHORYLATION_THROUGH_THE_ACTIVATION_OF_ADENYLATE_CYCLASE	12	1338	862	0.571619	0.845746	0.401446	0.791985	0.428381
REACTOME_SCF_SKP2_MEDIATED_DEGRADATION_OF_P27_P21	59	1337	863	0.569816	0.796286	0.139879	0.77978	0.430184
REACTOME_VLDLR_INTERNALISATION_AND_DEGRADATION	12	1336	864	0.569586	0.575076	0.261398	0.718699	0.430414
REACTOME_DEADENYLATION_DEPENDENT_MRNA_DECAY	52	1335	865	0.569413	0.725245	0.0871167	0.588524	0.430587
REACTOME_THE_PHOTOTRANSDUCTION_CASCADE	34	1334	866	0.567771	0.599074	0.169773	0.319197	0.432229
REACTOME_MINERALOCORTICOID_BIOSYNTHESIS	6	1333	867	0.566609	1	0.849132	1	0.433391
BIOCARTA_RANMS_PATHWAY	10	1332	868	0.566494	0.589835	0.267198	0.745576	0.433506
REACTOME_SPRY_REGULATION_OF_FGF_SIGNALING	16	1331	869	0.566123	0.450217	0.118083	0.633853	0.433877
REACTOME_COBALAMIN_CBL_VITAMIN_B12_TRANSPORT_AND_METABOLISM	19	1330	870	0.565557	0.626631	0.214379	0.56875	0.434443
BIOCARTA_VIP_PATHWAY	26	1329	871	0.564957	0.697501	0.27211	0.822329	0.435043
KEGG_VASCULAR_SMOOTH_MUSCLE_CONTRACTION	113	1328	872	0.564866	0.686864	0.0533436	0.777456	0.435134
REACTOME_NEGATIVE_REGULATION_OF_FGFR2_SIGNALING	34	1327	873	0.564811	0.342789	0.0905917	0.704635	0.435189
REACTOME_P75_NTR_RECEPTOR_MEDIATED_SIGNALLING	96	1326	874	0.563614	0.743452	0.0887463	0.735112	0.436386
REACTOME_RHO_GTPASES_ACTIVATE_RHOTEKIN_AND_RHOPHILINS	9	1325	875	0.563577	0.514357	0.164789	0.315673	0.436423
REACTOME_O_LINKED_GLYCOSYLATION_OF_MUCINS	61	1324	876	0.563049	0.571344	0.0183779	0.598652	0.436951
PID_SMAD2_3PATHWAY	16	1323	877	0.562968	0.479874	0.35028	0.823081	0.437032
REACTOME_DEFECTIVE_TPR_MAY_CONFER_SUSCEPTIBILITY_TOWARDS_THYROID_PAPILLARY_CARCINOMA_TPC	31	1322	878	0.562542	0.794088	0.242319	0.736292	0.437458
REACTOME_SHC_MEDIATED_CASCADE:FGFR2	23	1321	879	0.561698	0.341686	0.20506	0.747731	0.438302
PID_ENDOTHELIN_PATHWAY	63	1320	880	0.560851	0.841736	0.00714761	0.991504	0.439149
PID_MYC_ACTIV_PATHWAY	78	1319	881	0.560276	0.728224	0.0700461	0.730177	0.439724
REACTOME_ORC1_REMOVAL_FROM_CHROMATIN	70	1318	882	0.559296	0.80053	0.111274	0.77126	0.440704
REACTOME_FRUCTOSE_METABOLISM	6	1317	883	0.558706	0.586687	0.289346	0.777507	0.441294
REACTOME_CLASS_I_MHC_MEDIATED_ANTIGEN_PROCESSING_PRESENTATION	360	1316	884	0.55692	0.147864	0.0178693	0.0742327	0.44308
REACTOME_2_LTR_CIRCLE_FORMATION	7	1315	885	0.556242	0.589811	0.259492	0.757906	0.443758
BIOCARTA_CFTR_PATHWAY	11	1314	886	0.554943	0.509288	0.188345	0.689034	0.445057
BIOCARTA_SAM68_PATHWAY	6	1313	887	0.553668	0.821302	0.348531	0.625396	0.446332
REACTOME_TICAM1_DEPENDENT_ACTIVATION_OF_IRF3_IRF7	12	1312	888	0.552783	0.700662	0.148312	0.297099	0.447217
REACTOME_TYSND1_CLEAVES_PEROXISOMAL_PROTEINS	7	1311	889	0.552725	0.723288	0.282094	0.55945	0.447275
REACTOME_HDR_THROUGH_HOMOLOGOUS_RECOMBINATION_HRR	66	1310	890	0.551644	0.82943	0.109875	0.569867	0.448356
KEGG_GLUTATHIONE_METABOLISM	50	1309	891	0.551426	0.549934	0.0644698	0.619651	0.448574
REACTOME_INTESTINAL_ABSORPTION	5	1308	892	0.55131	0.73317	0.527338	0.523247	0.44869
REACTOME_SHC_MEDIATED_CASCADE:FGFR3	18	1307	893	0.55119	0.360402	0.179027	0.607439	0.44881
REACTOME_CS_DS_DEGRADATION	14	1306	894	0.551119	0.570906	0.17816	0.644083	0.448881
REACTOME_SIGNALING_BY_TGF_BETA_RECEPTOR_COMPLEX	73	1305	895	0.550289	0.153647	0.0612748	0.82011	0.449711
REACTOME_GLYCOLYSIS	71	1304	896	0.549775	0.634245	0.051179	0.639239	0.450225
REACTOME_JNK_C_JUN_KINASES_PHOSPHORYLATION_AND_ACTIVATION_MEDIATED_BY_ACTIVATED_HUMAN_TAK1	22	1303	897	0.549442	0.630732	0.135306	0.622637	0.450558
PID_ERBB2_ERBB3_PATHWAY	44	1302	898	0.549107	0.750631	0.0535138	0.78393	0.450893
REACTOME_FGFR1_LIGAND_BINDING_AND_ACTIVATION	15	1301	899	0.548957	0.279472	0.181596	0.698729	0.451043
REACTOME_NUCLEAR_ENVELOPE_BREAKDOWN	52	1300	900	0.548296	0.673227	0.0781763	0.725371	0.451704
BIOCARTA_MPR_PATHWAY	21	1299	901	0.547906	0.816704	0.273487	0.774776	0.452094
REACTOME_ATTENUATION_PHASE	28	1298	902	0.547608	0.312031	0.151784	0.817774	0.452392
REACTOME_MET_ACTIVATES_RAS_SIGNALING	11	1297	903	0.547449	0.429349	0.121934	0.487412	0.452551
PID_TCR_RAS_PATHWAY	14	1296	904	0.546656	0.527408	0.0738365	0.200523	0.453344
REACTOME_INACTIVATION_OF_CDC42_AND_RAC1	8	1295	905	0.546252	0.553954	0.251369	0.752877	0.453748
REACTOME_ACTIVATED_NTRK2_SIGNALS_THROUGH_FRS2_AND_FRS3	11	1294	906	0.546157	0.363925	0.162631	0.688751	0.453843
REACTOME_NUCLEAR_ENVELOPE_REASSEMBLY	13	1293	907	0.545034	0.677402	0.251515	0.726009	0.454966
REACTOME_SYNTHESIS_OF_WYBUTOSINE_AT_G37_OF_TRNA_PHE	6	1292	908	0.544723	0.620321	0.281084	0.644465	0.455277
PID_VEGFR1_PATHWAY	26	1291	909	0.544367	0.506619	0.138341	0.746989	0.455633
REACTOME_BUTYROPHILIN_BTN_FAMILY_INTERACTIONS	12	1290	910	0.54337	0.398739	0.1476	0.625305	0.45663
REACTOME_VIF_MEDIATED_DEGRADATION_OF_APOBEC3G	51	1289	911	0.542698	0.676558	0.103187	0.71158	0.457302
REACTOME_ADVANCED_GLYCOSYLATION_ENDPRODUCT_RECEPTOR_SIGNALING	13	1288	912	0.542636	0.772766	0.237363	0.713106	0.457364
KEGG_OLFACTORY_TRANSDUCTION	380	1287	913	0.540961	0.626989	0.826489	0.532537	0.459039
KEGG_CARDIAC_MUSCLE_CONTRACTION	77	1286	914	0.540357	0.654435	0.0316409	0.649618	0.459643
REACTOME_VEGFR2_MEDIATED_CELL_PROLIFERATION	19	1285	915	0.539981	0.503604	0.135839	0.570902	0.460019
REACTOME_L1CAM_INTERACTIONS	118	1284	916	0.539972	0.443068	0.00733622	0.703525	0.460028
PID_NETRIN_PATHWAY	32	1283	917	0.539692	0.577984	0.21801	0.810881	0.460308
BIOCARTA_PS1_PATHWAY	14	1282	918	0.539315	0.640144	0.204486	0.627716	0.460685
REACTOME_FGFR3B_LIGAND_BINDING_AND_ACTIVATION	7	1281	919	0.539169	0.630728	0.360354	0.681702	0.460831
REACTOME_STABILIZATION_OF_P53	55	1280	920	0.538936	0.763911	0.114451	0.739658	0.461064
REACTOME_ELEVATION_OF_CYTOSOLIC_CA2PLUS_LEVELS	16	1279	921	0.538625	0.580011	0.27646	0.832935	0.461375
REACTOME_FRUCTOSE_CATABOLISM	4	1278	922	0.538047	0.47528	0.366095	0.783246	0.461953
KEGG_LIMONENE_AND_PINENE_DEGRADATION	9	1277	923	0.537962	0.453862	0.164036	0.553878	0.462038
KEGG_CALCIUM_SIGNALING_PATHWAY	177	1276	924	0.537944	0.575886	0.00148863	0.781642	0.462056
REACTOME_ONCOGENE_INDUCED_SENESCENCE	34	1275	925	0.537739	0.649714	0.0868363	0.621967	0.462261
REACTOME_PTK6_PROMOTES_HIF1A_STABILIZATION	6	1274	926	0.537636	0.625052	0.282816	0.634992	0.462364
SA_REG_CASCADE_OF_CYCLIN_EXPR	13	1273	927	0.53694	0.687134	0.271456	0.769371	0.46306
REACTOME_MECP2_REGULATES_NEURONAL_RECEPTORS_AND_CHANNELS	18	1272	928	0.536837	0.755632	0.191193	0.731076	0.463163
REACTOME_RUNX1_REGULATES_TRANSCRIPTION_OF_GENES_INVOLVED_IN_WNT_SIGNALING	6	1271	929	0.535959	0.430177	0.16315	0.75403	0.464041
SA_G2_AND_M_PHASES	8	1270	930	0.53589	0.781184	0.230314	0.142535	0.46411
REACTOME_NEGATIVE_REGULATION_OF_FGFR3_SIGNALING	29	1269	931	0.535685	0.37138	0.0983348	0.679261	0.464315
REACTOME_TRANSLOCATION_OF_SLC2A4_GLUT4_TO_THE_PLASMA_MEMBRANE	71	1268	932	0.53421	0.7583	0.107063	0.765901	0.46579
REACTOME_REGULATION_OF_GENE_EXPRESSION_IN_EARLY_PANCREATIC_PRECURSOR_CELLS	8	1267	933	0.534078	0.23636	0.346802	1	0.465922
KEGG_PROXIMAL_TUBULE_BICARBONATE_RECLAMATION	23	1266	934	0.533977	0.574877	0.0140436	0.403857	0.466023
BIOCARTA_INTEGRIN_PATHWAY	34	1265	935	0.533364	0.648404	0.139176	0.615005	0.466636
KEGG_GAP_JUNCTION	88	1264	936	0.533097	0.672954	0.0319921	0.689066	0.466903
REACTOME_RUNX3_REGULATES_NOTCH_SIGNALING	14	1263	937	0.532001	0.727293	0.262921	0.692129	0.467999
REACTOME_DUAL_INCISION_IN_GG_NER	41	1262	938	0.531408	0.667576	0.0961058	0.508145	0.468592
PID_EPHRINB_REV_PATHWAY	30	1261	939	0.530336	0.48149	0.00309691	0.102652	0.469664
REACTOME_TRIGLYCERIDE_CATABOLISM	24	1260	940	0.530138	0.634252	0.275838	0.729803	0.469862
PID_AURORA_A_PATHWAY	31	1259	941	0.530098	0.664486	0.144743	0.753899	0.469902
REACTOME_GENE_EXPRESSION_TRANSCRIPTION	1449	1258	942	0.530085	0.416791	0.0108954	0.747369	0.469915
PID_ILK_PATHWAY	45	1257	943	0.529685	0.813411	0.184286	0.730122	0.470315
REACTOME_RECYCLING_OF_EIF2:GDP	8	1256	944	0.5288	0.372009	0.17045	0.25374	0.4712
REACTOME_PI_3K_CASCADE:FGFR2	23	1255	945	0.527363	0.287232	0.216568	0.759388	0.472637
BIOCARTA_MELANOCYTE_PATHWAY	7	1254	946	0.526677	0.736146	0.32513	0.624642	0.473323
PID_E2F_PATHWAY	73	1253	947	0.52653	0.801567	0.0563765	0.848769	0.47347
REACTOME_SIGNALING_BY_NON_RECEPTOR_TYROSINE_KINASES	54	1252	948	0.525195	0.575588	0.117192	0.796669	0.474805
REACTOME_LONG_TERM_POTENTIATION	23	1251	949	0.525073	0.619818	0.142903	0.787967	0.474927
BIOCARTA_MCM_PATHWAY	18	1250	950	0.524987	0.766522	0.216078	0.371489	0.475013
REACTOME_PTK6_EXPRESSION	5	1249	951	0.524671	0.740921	0.324568	0.570651	0.475329
REACTOME_CLASS_C_3_METABOTROPIC_GLUTAMATE_PHEROMONE_RECEPTORS	39	1248	952	0.524191	0.50164	0.465476	0.613866	0.475809
REACTOME_CELL_CYCLE	624	1247	953	0.523763	0.768023	0.00542957	0.766066	0.476237
REACTOME_CELLULAR_RESPONSE_TO_HYPOXIA	72	1246	954	0.523634	0.625005	0.0654686	0.769015	0.476366
REACTOME_SHC_MEDIATED_CASCADE:FGFR4	20	1245	955	0.522009	0.407898	0.239525	0.661863	0.477991
REACTOME_EFFECTS_OF_PIP2_HYDROLYSIS	27	1244	956	0.52187	0.354865	0.0550928	0.584434	0.47813
BIOCARTA_WNT_LRP6_PATHWAY	6	1243	957	0.521426	0.84517	0.717234	1	0.478574
REACTOME_LINOLEIC_ACID_LA_METABOLISM	8	1242	958	0.521084	0.406303	0.220021	0.550345	0.478916
REACTOME_TRANSPORT_OF_MATURE_TRANSCRIPT_TO_CYTOPLASM	83	1241	959	0.520683	0.798973	0.111355	0.779219	0.479317
REACTOME_WNT5A_DEPENDENT_INTERNALIZATION_OF_FZD2_FZD5_AND_ROR2	13	1240	960	0.520074	0.517809	0.166854	0.658559	0.479926
REACTOME_TRAFFICKING_OF_MYRISTOYLATED_PROTEINS_TO_THE_CILIUM	5	1239	961	0.520039	0.820572	0.335557	0.403523	0.479961
KEGG_TASTE_TRANSDUCTION	51	1238	962	0.51972	0.29086	0.199934	0.640141	0.48028
PID_S1P_META_PATHWAY	21	1237	963	0.519269	0.522665	0.0867023	0.457716	0.480731
BIOCARTA_CREM_PATHWAY	6	1236	964	0.519136	0.654268	0.33042	0.504092	0.480864
PID_REELIN_PATHWAY	28	1235	965	0.518796	0.774489	0.319165	0.732495	0.481204
REACTOME_PI3K_AKT_ACTIVATION	9	1234	966	0.517914	0.371748	0.213372	0.768942	0.482086
PID_RB_1PATHWAY	65	1233	967	0.517666	0.649902	0.0757456	0.712376	0.482334
REACTOME_NEUROFASCIN_INTERACTIONS	7	1232	968	0.516656	0.481156	0.22307	0.612851	0.483344
REACTOME_SULFIDE_OXIDATION_TO_SULFATE	5	1231	969	0.515858	0.659712	0.293023	0.520841	0.484142
PID_P38_MKK3_6PATHWAY	26	1230	970	0.515152	0.792067	0.335263	0.786813	0.484848
REACTOME_KERATAN_SULFATE_DEGRADATION	13	1229	971	0.514786	0.493528	0.151511	0.440201	0.485214
REACTOME_DOPAMINE_RECEPTORS	5	1228	972	0.514656	0.822759	0.842281	0.0446545	0.485344
BIOCARTA_VEGF_PATHWAY	27	1227	973	0.514481	0.278701	0.0446957	0.459558	0.485519
REACTOME_REGULATION_OF_PTEN_LOCALIZATION	9	1226	974	0.513992	0.641829	0.310877	0.758157	0.486008
BIOCARTA_GABA_PATHWAY	10	1225	975	0.512437	0.809691	0.294344	0.580334	0.487563
REACTOME_SUMO_IS_TRANSFERRED_FROM_E1_TO_E2_UBE2I_UBC9	7	1224	976	0.511936	0.597595	0.260946	0.739392	0.488064
REACTOME_ORGANIC_ANION_TRANSPORT	5	1223	977	0.511737	0.633907	0.368175	0.311042	0.488263
REACTOME_KSRP_KHSRP_BINDS_AND_DESTABILIZES_MRNA	17	1222	978	0.51033	0.675252	0.24036	0.772801	0.48967
REACTOME_HORMONE_LIGAND_BINDING_RECEPTORS	12	1221	979	0.510302	0.653638	0.835328	0.751367	0.489698
REACTOME_CELLULAR_HEXOSE_TRANSPORT	20	1220	980	0.509193	0.541073	0.0759176	0.0731989	0.490807
PID_LIS1_PATHWAY	28	1219	981	0.509123	0.649133	0.218148	0.769691	0.490877
REACTOME_PI_3K_CASCADE:FGFR1	21	1218	982	0.508717	0.145418	0.10342	0.665927	0.491283
REACTOME_NEGATIVE_REGULATION_OF_FGFR4_SIGNALING	31	1217	983	0.508302	0.401875	0.152744	0.719595	0.491698
REACTOME_ALPHA_OXIDATION_OF_PHYTANATE	6	1216	984	0.508214	0.452089	0.226535	0.544502	0.491786
REACTOME_TRANSCRIPTIONAL_REGULATION_BY_RUNX2	118	1215	985	0.50781	0.311202	0.0564469	0.776275	0.49219
REACTOME_FATTY_ACID_METABOLISM	169	1214	986	0.507791	0.297968	0.00644801	0.609317	0.492209
BIOCARTA_GATA3_PATHWAY	14	1213	987	0.507557	0.598605	0.392212	0.80616	0.492443
REACTOME_PHASE_I_FUNCTIONALIZATION_OF_COMPOUNDS	104	1212	988	0.50591	0.0883432	0.00320449	0.0336288	0.49409
KEGG_VIBRIO_CHOLERAE_INFECTION	53	1211	989	0.504889	0.552898	0.0461932	0.525984	0.495111
REACTOME_SHC_RELATED_EVENTS_TRIGGERED_BY_IGF1R	9	1210	990	0.504826	0.239011	0.189991	0.773484	0.495174
REACTOME_REGULATION_OF_APOPTOSIS	52	1209	991	0.504578	0.712113	0.0837998	0.711535	0.495422
REACTOME_SURFACTANT_METABOLISM	28	1208	992	0.503473	0.568463	0.258374	0.436151	0.496527
REACTOME_ION_CHANNEL_TRANSPORT	183	1207	993	0.502796	0.764626	0.00504687	0.505221	0.497204
SIG_REGULATION_OF_THE_ACTIN_CYTOSKELETON_BY_RHO_GTPASES	34	1206	994	0.502559	0.784188	0.329733	0.751977	0.497441
REACTOME_VITAMIN_B2_RIBOFLAVIN_METABOLISM	7	1205	995	0.502291	0.689254	0.377242	0.81557	0.497709
REACTOME_ION_HOMEOSTASIS	54	1204	996	0.502105	0.726694	0.0829358	0.734204	0.497895
REACTOME_SYNTHESIS_OF_PIPS_AT_THE_ER_MEMBRANE	5	1203	997	0.501033	0.647184	0.280814	0.492725	0.498967
REACTOME_TANDEM_PORE_DOMAIN_POTASSIUM_CHANNELS	12	1202	998	0.499571	0.637649	0.144894	0.00310036	0.500429
REACTOME_SIGNALING_BY_EGFR	49	1201	999	0.499346	0.316872	0.0595418	0.739383	0.500654
BIOCARTA_IGF1R_PATHWAY	23	1200	1000	0.499183	0.724666	0.214793	0.766151	0.500817
KEGG_OXIDATIVE_PHOSPHORYLATION	114	1199	1001	0.499124	0.724996	0.104753	0.727855	0.500876
BIOCARTA_MEF2D_PATHWAY	18	1197	1002	0.499064	0.661994	0.139317	0.533858	0.500936
REACTOME_PTK6_REGULATES_RHO_GTPASES_RAS_GTPASE_AND_MAP_KINASES	14	1198	1003	0.499064	0.499374	0.199854	0.756037	0.500936
REACTOME_CYCLIN_A_B1_B2_ASSOCIATED_EVENTS_DURING_G2_M_TRANSITION	25	1196	1004	0.49797	0.671187	0.191991	0.58985	0.50203
REACTOME_HDMS_DEMETHYLATE_HISTONES	46	1195	1005	0.497445	0.625239	0.0632911	0.573497	0.502555
REACTOME_FGFR3_LIGAND_BINDING_AND_ACTIVATION	13	1194	1006	0.497348	0.451916	0.327489	0.704245	0.502652
KEGG_NITROGEN_METABOLISM	23	1193	1007	0.497332	0.604123	0.0529846	0.639011	0.502668
REACTOME_SIGNALING_BY_GPCR	1146	1192	1008	0.496797	0.335976	0.0548293	0.382406	0.503203
REACTOME_PHENYLALANINE_AND_TYROSINE_METABOLISM	10	1191	1009	0.496783	0.782557	0.324219	0.150875	0.503217
BIOCARTA_G1_PATHWAY	28	1190	1010	0.496662	0.672618	0.173241	0.733587	0.503338
KEGG_DORSO_VENTRAL_AXIS_FORMATION	24	1189	1011	0.496527	0.559378	0.0606277	0.644326	0.503473
REACTOME_PI_3K_CASCADE:FGFR3	18	1188	1012	0.496277	0.304286	0.192732	0.662036	0.503723
REACTOME_SIGNALING_BY_FGFR3_FUSIONS_IN_CANCER	10	1187	1013	0.496155	0.420395	0.175267	0.725902	0.503845
BIOCARTA_REELIN_PATHWAY	7	1186	1014	0.495975	0.754368	0.321146	0.75126	0.504025
REACTOME_INTRINSIC_PATHWAY_OF_FIBRIN_CLOT_FORMATION	22	1185	1015	0.495954	0.539779	0.0574758	0.280935	0.504046
REACTOME_SIGNALING_BY_NTRK2_TRKB	25	1184	1016	0.495673	0.410429	0.108069	0.754672	0.504327
REACTOME_PROCESSING_OF_DNA_DOUBLE_STRAND_BREAK_ENDS	94	1183	1017	0.495586	0.641403	0.172134	0.696196	0.504414
REACTOME_PHOSPHORYLATION_OF_EMI1	6	1182	1018	0.494543	0.8176	0.396084	0.615633	0.505457
BIOCARTA_DREAM_PATHWAY	13	1181	1019	0.494314	0.594854	0.198251	0.679539	0.505686
BIOCARTA_LIS1_PATHWAY	19	1180	1020	0.491605	0.634421	0.116541	0.54731	0.508395
KEGG_BETA_ALANINE_METABOLISM	22	1179	1021	0.490863	0.412088	0.150286	0.74503	0.509137
BIOCARTA_CCR3_PATHWAY	19	1178	1022	0.490175	0.430876	0.186812	0.699408	0.509825
KEGG_TIGHT_JUNCTION	129	1177	1023	0.490123	0.634314	0.0141245	0.724017	0.509877
REACTOME_DEGRADATION_OF_AXIN	54	1176	1024	0.490031	0.765092	0.112878	0.744006	0.509969
PID_RETINOIC_ACID_PATHWAY	30	1174	1025	0.489093	0.60358	0.151012	0.716731	0.510907
REACTOME_LOSS_OF_MECP2_BINDING_ABILITY_TO_THE_NCOR_SMRT_COMPLEX	7	1175	1026	0.489093	0.709135	0.28453	0.681887	0.510907
REACTOME_TRANSCRIPTIONAL_REGULATION_OF_PLURIPOTENT_STEM_CELLS	31	1173	1027	0.488867	0.52977	0.113273	0.561538	0.511133
REACTOME_CREB_PHOSPHORYLATION	7	1172	1028	0.488437	0.706192	0.270831	0.601154	0.511563
REACTOME_ACTIVATION_OF_RAC1	12	1171	1029	0.488344	0.624961	0.219752	0.69706	0.511656
REACTOME_HATS_ACETYLATE_HISTONES	133	1170	1030	0.487861	0.611418	0.071193	0.721039	0.512139
REACTOME_ACTIVATION_OF_AMPK_DOWNSTREAM_OF_NMDARS	28	1169	1031	0.487068	0.346725	0.121042	0.491291	0.512932
REACTOME_PROCESSIVE_SYNTHESIS_ON_THE_C_STRAND_OF_THE_TELOMERE	11	1168	1032	0.486062	0.590978	0.137763	0.15933	0.513938
REACTOME_FGFR2B_LIGAND_BINDING_AND_ACTIVATION	10	1167	1033	0.485553	0.414481	0.338145	1	0.514447
REACTOME_ACTIVATION_OF_PUMA_AND_TRANSLOCATION_TO_MITOCHONDRIA	9	1166	1034	0.485195	0.499568	0.195776	0.672413	0.514805
REACTOME_SIGNALING_BY_EGFR_IN_CANCER	24	1165	1035	0.484324	0.239846	0.0781357	0.685471	0.515676
REACTOME_FGFR2_LIGAND_BINDING_AND_ACTIVATION	20	1164	1036	0.483776	0.292156	0.289005	0.728021	0.516224
REACTOME_FRS_MEDIATED_FGFR2_SIGNALING	25	1163	1037	0.482849	0.278342	0.202531	0.696653	0.517151
BIOCARTA_CARDIACEGF_PATHWAY	18	1162	1038	0.482788	0.162344	0.0542624	0.522858	0.517212
REACTOME_GRB7_EVENTS_IN_ERBB2_SIGNALING	5	1161	1039	0.482669	0.674477	0.309978	0.538388	0.517331
REACTOME_AUF1_HNRNP_D0_BINDS_AND_DESTABILIZES_MRNA	54	1160	1040	0.4823	0.716613	0.0896777	0.733809	0.5177
REACTOME_G1_S_SPECIFIC_TRANSCRIPTION	29	1159	1041	0.482097	0.765018	0.19724	0.664356	0.517903
REACTOME_ASYMMETRIC_LOCALIZATION_OF_PCP_PROTEINS	63	1158	1042	0.481709	0.688446	0.0821029	0.704375	0.518291
BIOCARTA_IRES_PATHWAY	7	1157	1043	0.481545	0.733875	0.306066	0.726993	0.518455
SIG_PIP3_SIGNALING_IN_CARDIAC_MYOCTES	66	1156	1044	0.481412	0.764287	0.0423071	0.629939	0.518588
BIOCARTA_RAB_PATHWAY	13	1155	1045	0.479699	0.292449	0.146555	0.499415	0.520301
REACTOME_NRCAM_INTERACTIONS	7	1154	1046	0.479371	0.191131	0.2409	0.742796	0.520629
BIOCARTA_EIF4_PATHWAY	24	1153	1047	0.478779	0.525563	0.115225	0.753065	0.521221
REACTOME_UPTAKE_AND_ACTIONS_OF_BACTERIAL_TOXINS	29	1152	1048	0.478411	0.483342	0.087655	0.696238	0.521589
REACTOME_FRS_MEDIATED_FGFR3_SIGNALING	20	1151	1049	0.478163	0.35284	0.197204	0.669073	0.521837
REACTOME_NEF_MEDIATED_CD8_DOWN_REGULATION	7	1150	1050	0.477721	0.633126	0.242859	0.573289	0.522279
REACTOME_ACTIVATION_OF_BAD_AND_TRANSLOCATION_TO_MITOCHONDRIA	15	1149	1051	0.477698	0.748707	0.168945	0.54228	0.522302
REACTOME_HOMOLOGY_DIRECTED_REPAIR	134	1148	1052	0.47717	0.732446	0.0911679	0.70798	0.52283
PID_SMAD2_3NUCLEAR_PATHWAY	82	1147	1053	0.477058	0.703834	0.0136868	0.977744	0.522942
REACTOME_FORMATION_OF_TUBULIN_FOLDING_INTERMEDIATES_BY_CCT_TRIC	26	1146	1054	0.476674	0.405734	0.140687	0.526813	0.523326
PID_ECADHERIN_NASCENT_AJ_PATHWAY	38	1145	1055	0.476616	0.713661	0.217874	0.761492	0.523384
BIOCARTA_CELLCYCLE_PATHWAY	23	1144	1056	0.47547	0.661664	0.185079	0.712832	0.52453
REACTOME_RETROGRADE_NEUROTROPHIN_SIGNALLING	14	1143	1057	0.4753	0.186857	0.0272768	0.218602	0.5247
REACTOME_MISCELLANEOUS_SUBSTRATES	12	1142	1058	0.473295	0.186313	0.410358	0.769786	0.526705
REACTOME_LIPID_PARTICLE_ORGANIZATION	6	1141	1059	0.473253	0.366903	0.200999	0.519439	0.526747
REACTOME_LEUKOTRIENE_RECEPTORS	5	1140	1060	0.473143	0.408492	0.296938	0.740413	0.526857
KEGG_PROTEASOME	44	1139	1061	0.472602	0.692118	0.137419	0.765839	0.527398
REACTOME_PROLACTIN_RECEPTOR_SIGNALING	15	1138	1062	0.472334	0.589481	0.286399	0.642101	0.527666
BIOCARTA_TFF_PATHWAY	24	1137	1063	0.471846	0.261514	0.0357041	0.610897	0.528154
REACTOME_DEFECTIVE_CHST3_CAUSES_SEDCJD	8	1136	1064	0.471822	0.16568	0.194513	0.700596	0.528178
PID_LPA4_PATHWAY	15	1135	1065	0.4718	0.504754	0.146061	0.594676	0.5282
REACTOME_MAP3K8_TPL2_DEPENDENT_MAPK1_3_ACTIVATION	16	1134	1066	0.47154	0.672023	0.251532	0.688163	0.52846
REACTOME_TGF_BETA_RECEPTOR_SIGNALING_ACTIVATES_SMADS	32	1133	1067	0.471414	0.368598	0.0555896	0.734648	0.528586
REACTOME_MAPK3_ERK1_ACTIVATION	10	1132	1068	0.471197	0.739978	0.180079	0.501465	0.528803
REACTOME_THE_ROLE_OF_GTSE1_IN_G2_M_PROGRESSION_AFTER_G2_CHECKPOINT	77	1131	1069	0.470858	0.628817	0.105355	0.718821	0.529142
REACTOME_EGFR_TRANSACTIVATION_BY_GASTRIN	9	1130	1070	0.46999	0.257474	0.11616	0.452224	0.53001
KEGG_VASOPRESSIN_REGULATED_WATER_REABSORPTION	44	1129	1071	0.469851	0.736476	0.18772	0.724102	0.530149
REACTOME_UREA_CYCLE	10	1128	1072	0.469573	0.216915	0.134237	0.111955	0.530427
KEGG_STARCH_AND_SUCROSE_METABOLISM	52	1127	1073	0.468228	0.630756	0.423394	0.784696	0.531772
REACTOME_P75NTR_REGULATES_AXONOGENESIS	10	1126	1074	0.466853	0.318722	0.174228	0.803689	0.533147
REACTOME_CREATINE_METABOLISM	11	1125	1075	0.466809	0.779126	0.381498	0.794944	0.533191
REACTOME_ACTIVATION_OF_ATR_IN_RESPONSE_TO_REPLICATION_STRESS	37	1124	1076	0.466165	0.792286	0.1418	0.554407	0.533835
PID_TRKR_PATHWAY	61	1123	1077	0.466108	0.531527	0.0452927	0.749101	0.533892
REACTOME_YAP1_AND_WWTR1_TAZ_STIMULATED_GENE_EXPRESSION	14	1122	1078	0.465788	0.651872	0.213686	0.768053	0.534212
KEGG_AXON_GUIDANCE	128	1121	1079	0.465479	0.805383	0.0305824	0.748561	0.534521
REACTOME_DEFECTIVE_ST3GAL3_CAUSES_MCT12_AND_EIEE15	8	1120	1080	0.465197	0.194588	0.0763708	0.28281	0.534803
REACTOME_PI_3K_CASCADE:FGFR4	20	1119	1081	0.464959	0.351926	0.255744	0.699884	0.535041
REACTOME_N_GLYCAN_ANTENNAE_ELONGATION_IN_THE_MEDIAL_TRANS_GOLGI	26	1118	1082	0.46473	0.665824	0.19655	0.638669	0.53527
REACTOME_CAMK_IV_MEDIATED_PHOSPHORYLATION_OF_CREB	10	1117	1083	0.464608	0.735221	0.198883	0.501656	0.535392
REACTOME_SYNTHESIS_OF_IP2_IP_AND_INS_IN_THE_CYTOSOL	14	1116	1084	0.46417	0.452455	0.149499	0.420341	0.53583
REACTOME_FORMYL_PEPTIDE_RECEPTORS_BIND_FORMYL_PEPTIDES_AND_MANY_OTHER_LIGANDS	8	1115	1085	0.46332	0.290408	0.0846074	0.334274	0.53668
REACTOME_GAP_FILLING_DNA_REPAIR_SYNTHESIS_AND_LIGATION_IN_GG_NER	25	1114	1086	0.462964	0.713214	0.142713	0.549275	0.537036
BIOCARTA_MAL_PATHWAY	19	1113	1087	0.46227	0.753225	0.312063	0.723743	0.53773
BIOCARTA_RAS_PATHWAY	22	1112	1088	0.462057	0.753582	0.271122	0.772716	0.537943
BIOCARTA_MITR_PATHWAY	5	1111	1089	0.461943	0.285094	0.199097	0.706094	0.538057
REACTOME_O_GLYCOSYLATION_OF_TSR_DOMAIN_CONTAINING_PROTEINS	38	1110	1090	0.461502	0.132012	0.00492835	0.169938	0.538498
PID_ERBB1_RECEPTOR_PROXIMAL_PATHWAY	35	1109	1091	0.460949	0.406243	0.0537841	0.74486	0.539051
REACTOME_FGFR2C_LIGAND_BINDING_AND_ACTIVATION	13	1108	1092	0.460846	0.381792	0.347012	0.676359	0.539154
REACTOME_ASSEMBLY_OF_ACTIVE_LPL_AND_LIPC_LIPASE_COMPLEXES	18	1107	1093	0.460688	0.496784	0.358511	0.822937	0.539312
REACTOME_PLASMA_LIPOPROTEIN_CLEARANCE	33	1106	1094	0.460535	0.518469	0.139507	0.610605	0.539465
BIOCARTA_AGPCR_PATHWAY	11	1105	1095	0.460212	0.194576	0.174907	0.720015	0.539788
KEGG_SPHINGOLIPID_METABOLISM	36	1104	1096	0.459947	0.583315	0.140899	0.598077	0.540053
REACTOME_ACTIVATED_NTRK3_SIGNALS_THROUGH_RAS	8	1103	1097	0.459908	0.170433	0.132642	0.532403	0.540092
BIOCARTA_HIF_PATHWAY	15	1102	1098	0.459882	0.524965	0.280661	0.766784	0.540118
REACTOME_NEUROTRANSMITTER_RELEASE_CYCLE	50	1101	1099	0.459617	0.283866	0.0187317	0.715868	0.540383
REACTOME_NF_KB_ACTIVATION_THROUGH_FADD_RIP_1_PATHWAY_MEDIATED_BY_CASPASE_8_AND_10	12	1100	1100	0.456401	0.675262	0.098673	0.0230531	0.543599
REACTOME_P75NTR_SIGNALS_VIA_NF_KB	16	1099	1101	0.454228	0.532853	0.227932	0.716297	0.545772
REACTOME_FRS_MEDIATED_FGFR1_SIGNALING	23	1098	1102	0.452669	0.176062	0.112028	0.696764	0.547331
REACTOME_INTERLEUKIN_36_PATHWAY	7	1097	1103	0.452242	0.583809	0.834796	0.715221	0.547758
REACTOME_VLDL_CLEARANCE	6	1096	1104	0.451187	0.30397	0.305259	0.76556	0.548813
REACTOME_DEFECTIVE_CHST6_CAUSES_MCDC1	8	1095	1105	0.450856	0.20856	0.0856162	0.407187	0.549144
REACTOME_G1_PHASE	44	1094	1106	0.450399	0.62596	0.0635506	0.89288	0.549601
REACTOME_POTASSIUM_CHANNELS	97	1093	1107	0.449768	0.358752	0.00216111	0.0220206	0.550232
PID_ERB_GENOMIC_PATHWAY	15	1092	1108	0.449181	0.524815	0.260752	0.762985	0.550819
REACTOME_HISTIDINE_CATABOLISM	7	1091	1109	0.449152	0.153965	0.179965	0.645011	0.550848
REACTOME_TRANSPORT_OF_NUCLEOTIDE_SUGARS	9	1090	1110	0.449083	0.316112	0.156991	0.562505	0.550917
REACTOME_SEMA4D_MEDIATED_INHIBITION_OF_CELL_ATTACHMENT_AND_MIGRATION	8	1089	1111	0.447885	0.353915	0.212864	0.745628	0.552115
BIOCARTA_VDR_PATHWAY	24	1088	1112	0.447539	0.685698	0.204402	0.792887	0.552461
REACTOME_SYNTHESIS_SECRETION_AND_DEACYLATION_OF_GHRELIN	19	1087	1113	0.446104	0.411674	0.254872	0.743413	0.553896
BIOCARTA_RACC_PATHWAY	13	1086	1114	0.445876	0.743945	0.180442	0.094929	0.554124
PID_IL8_CXCR2_PATHWAY	33	1085	1115	0.445558	0.0742931	0.00293471	0.00146083	0.554442
REACTOME_PP2A_MEDIATED_DEPHOSPHORYLATION_OF_KEY_METABOLIC_FACTORS	7	1084	1116	0.443088	0.463227	0.229797	0.668581	0.556912
REACTOME_INSULIN_RECEPTOR_RECYCLING	26	1083	1117	0.442984	0.675434	0.121065	0.242187	0.557016
REACTOME_INTERLEUKIN_37_SIGNALING	20	1082	1118	0.442961	0.41066	0.153118	0.687405	0.557039
BIOCARTA_PDZS_PATHWAY	17	1081	1119	0.442528	0.502736	0.151223	0.677037	0.557472
REACTOME_SERINE_BIOSYNTHESIS	9	1080	1120	0.441784	0.554682	0.271643	0.644547	0.558216
BIOCARTA_MCALPAIN_PATHWAY	19	1079	1121	0.441486	0.713513	0.243468	0.654488	0.558514
REACTOME_BH3_ONLY_PROTEINS_ASSOCIATE_WITH_AND_INACTIVATE_ANTI_APOPTOTIC_BCL_2_MEMBERS	9	1078	1122	0.441314	0.734418	0.251382	0.681294	0.558686
KEGG_THYROID_CANCER	29	1077	1123	0.441036	0.569682	0.152892	0.796006	0.558964
REACTOME_DEFECTIVE_CHST14_CAUSES_EDS_MUSCULOCONTRACTURAL_TYPE	8	1076	1124	0.440246	0.166364	0.209507	0.757307	0.559754
PID_FANCONI_PATHWAY	43	1075	1125	0.439442	0.571	0.048501	0.494554	0.560558
REACTOME_ROLE_OF_SECOND_MESSENGERS_IN_NETRIN_1_SIGNALING	10	1074	1126	0.439376	0.64224	0.304174	0.483095	0.560624
REACTOME_SEMA3A_PLEXIN_REPULSION_SIGNALING_BY_INHIBITING_INTEGRIN_ADHESION	14	1073	1127	0.438944	0.550119	0.153111	0.66385	0.561056
REACTOME_PI_METABOLISM	83	1072	1128	0.43811	0.118854	0.00548371	0.0438048	0.56189
REACTOME_SUMOYLATION	184	1071	1129	0.437681	0.709835	0.0380459	0.794384	0.562319
REACTOME_ACTIVATED_NTRK2_SIGNALS_THROUGH_PI3K	7	1070	1130	0.437673	0.303697	0.164324	0.564449	0.562327
REACTOME_NOTCH3_ACTIVATION_AND_TRANSMISSION_OF_SIGNAL_TO_THE_NUCLEUS	24	1069	1131	0.437263	0.624076	0.136046	0.630533	0.562737
REACTOME_LGI_ADAM_INTERACTIONS	14	1068	1132	0.436676	0.42881	0.107158	0.0688084	0.563324
REACTOME_PROLONGED_ERK_ACTIVATION_EVENTS	12	1067	1133	0.435921	0.664182	0.153616	0.52455	0.564079
REACTOME_NOTCH2_INTRACELLULAR_DOMAIN_REGULATES_TRANSCRIPTION	12	1066	1134	0.435584	0.392352	0.179135	0.436953	0.564416
REACTOME_DNA_DOUBLE_STRAND_BREAK_REPAIR	162	1065	1135	0.435127	0.840382	0.0834681	0.676603	0.564873
REACTOME_PKA_MEDIATED_PHOSPHORYLATION_OF_KEY_METABOLIC_FACTORS	5	1064	1136	0.434967	0.526227	0.347218	0.640306	0.565033
REACTOME_TRAF6_MEDIATED_IRF7_ACTIVATION_IN_TLR7_8_OR_9_SIGNALING	14	1063	1137	0.434741	0.438007	0.0428715	0.0919563	0.565259
BIOCARTA_PLK3_PATHWAY	8	1062	1138	0.434488	0.394181	0.213436	0.710682	0.565512
REACTOME_NONHOMOLOGOUS_END_JOINING_NHEJ	65	1061	1139	0.434481	0.633611	0.202953	0.659345	0.565519
REACTOME_BUDDING_AND_MATURATION_OF_HIV_VIRION	28	1060	1140	0.434452	0.70597	0.22607	0.824907	0.565548
REACTOME_SIGNALING_BY_ACTIVIN	13	1059	1141	0.434202	0.287322	0.179101	0.712729	0.565798
REACTOME_GLI_PROTEINS_BIND_PROMOTERS_OF_HH_RESPONSIVE_GENES_TO_PROMOTE_TRANSCRIPTION	7	1058	1142	0.433804	0.226866	0.241769	0.787864	0.566196
REACTOME_NUCLEOTIDE_SALVAGE	22	1057	1143	0.433728	0.502337	0.119448	0.577757	0.566272
REACTOME_HOST_INTERACTIONS_WITH_INFLUENZA_FACTORS	42	1056	1144	0.432763	0.487376	0.0789936	0.741426	0.567237
REACTOME_TRNA_PROCESSING_IN_THE_NUCLEUS	56	1055	1145	0.432531	0.525366	0.0886848	0.791746	0.567469
REACTOME_MECP2_REGULATES_TRANSCRIPTION_OF_NEURONAL_LIGANDS	8	1054	1146	0.431841	0.621988	0.313212	0.643031	0.568159
REACTOME_REGULATION_OF_GLYCOLYSIS_BY_FRUCTOSE_2_6_BISPHOSPHATE_METABOLISM	12	1053	1147	0.431778	0.345707	0.215933	0.709265	0.568222
REACTOME_DEFECTIVE_CFTR_CAUSES_CYSTIC_FIBROSIS	60	1052	1148	0.43171	0.641929	0.0955098	0.793255	0.56829
REACTOME_TERMINATION_OF_TRANSLESION_DNA_SYNTHESIS	31	1051	1149	0.431323	0.675332	0.0911867	0.460045	0.568677
REACTOME_PASSIVE_TRANSPORT_BY_AQUAPORINS	13	1050	1150	0.431205	0.164654	0.164103	0.538228	0.568795
PID_NOTCH_PATHWAY	58	1049	1151	0.430834	0.465305	0.0303991	0.783673	0.569166
REACTOME_PRE_NOTCH_PROCESSING_IN_GOLGI	18	1048	1152	0.430808	0.569954	0.121912	0.543904	0.569192
REACTOME_FRS_MEDIATED_FGFR4_SIGNALING	22	1047	1153	0.430072	0.384366	0.242918	0.679336	0.569928
REACTOME_ENDOGENOUS_STEROLS	26	1046	1154	0.427785	0.450167	0.0363897	0.0314687	0.572215
REACTOME_ACTIVATION_OF_THE_TFAP2_AP_2_FAMILY_OF_TRANSCRIPTION_FACTORS	12	1045	1155	0.427586	0.761655	0.229976	0.800928	0.572414
BIOCARTA_PAR1_PATHWAY	19	1044	1156	0.427107	0.3536	0.0986363	0.750383	0.572893
REACTOME_G2_M_DNA_DAMAGE_CHECKPOINT	91	1043	1157	0.426211	0.651851	0.171365	0.644282	0.573789
REACTOME_TRAF6_MEDIATED_IRF7_ACTIVATION	29	1042	1158	0.425125	0.614786	0.525729	0.608081	0.574875
KEGG_NUCLEOTIDE_EXCISION_REPAIR	44	1041	1159	0.424538	0.739947	0.0608019	0.465344	0.575462
REACTOME_PERK_REGULATES_GENE_EXPRESSION	30	1040	1160	0.424239	0.478444	0.121014	0.826679	0.575761
REACTOME_THE_RETINOID_CYCLE_IN_CONES_DAYLIGHT_VISION	7	1039	1161	0.423348	0.575424	0.578487	0.796647	0.576652
REACTOME_TRANSPORT_AND_SYNTHESIS_OF_PAPS	6	1038	1162	0.422974	0.281615	0.210638	0.604114	0.577026
REACTOME_PTK6_REGULATES_RTKS_AND_THEIR_EFFECTORS_AKT1_AND_DOK1	9	1037	1163	0.421848	0.68837	0.237278	0.536582	0.578152
REACTOME_RECEPTOR_MEDIATED_MITOPHAGY	11	1036	1164	0.421084	0.453933	0.192666	0.722515	0.578916
REACTOME_MITOCHONDRIAL_IRON_SULFUR_CLUSTER_BIOGENESIS	12	1035	1165	0.421036	0.352301	0.143931	0.749362	0.578964
REACTOME_TFAP2_AP_2_FAMILY_REGULATES_TRANSCRIPTION_OF_GROWTH_FACTORS_AND_THEIR_RECEPTORS	14	1034	1166	0.420546	0.420771	0.249384	0.800798	0.579454
BIOCARTA_CREB_PATHWAY	22	1033	1167	0.420112	0.641243	0.167667	0.78744	0.579888
REACTOME_NF_KB_IS_ACTIVATED_AND_SIGNALS_SURVIVAL	13	1032	1168	0.419671	0.547698	0.252119	0.736706	0.580329
REACTOME_CHROMATIN_ORGANIZATION	258	1031	1169	0.418224	0.624512	0.057327	0.649144	0.581776
REACTOME_ESTABLISHMENT_OF_SISTER_CHROMATID_COHESION	10	1030	1170	0.418198	0.661058	0.256905	0.653317	0.581802
REACTOME_ACTIVATION_OF_BH3_ONLY_PROTEINS	30	1029	1171	0.418175	0.751831	0.13295	0.605068	0.581825
REACTOME_EXTRINSIC_PATHWAY_OF_FIBRIN_CLOT_FORMATION	5	1028	1172	0.416545	0.643676	0.278404	0.657624	0.583455
REACTOME_RMTS_METHYLATE_HISTONE_ARGININES	77	1027	1173	0.415805	0.457244	0.0684641	0.672352	0.584195
REACTOME_VESICLE_MEDIATED_TRANSPORT	716	1026	1174	0.415438	0.711638	0.0232074	0.67381	0.584562
BIOCARTA_HBX_PATHWAY	7	1025	1175	0.414096	0.609996	0.206082	0.538944	0.585904
BIOCARTA_TOLL_PATHWAY	25	1024	1176	0.413494	0.419706	0.0625015	0.48865	0.586506
REACTOME_VITAMIN_C_ASCORBATE_METABOLISM	8	1023	1177	0.413492	0.601659	0.314724	0.702785	0.586508
REACTOME_METABOLISM_OF_AMINE_DERIVED_HORMONES	18	1022	1178	0.412963	0.794062	0.310474	0.158845	0.587037
BIOCARTA_TRKA_PATHWAY	14	1021	1179	0.41191	0.0730178	0.0159129	0.229968	0.58809
BIOCARTA_SM_PATHWAY	14	1020	1180	0.411574	0.687958	0.261129	0.758754	0.588426
KEGG_NON_SMALL_CELL_LUNG_CANCER	54	1019	1181	0.410527	0.10672	0.00545113	0.669325	0.589473
REACTOME_TRAF6_MEDIATED_INDUCTION_OF_TAK1_COMPLEX_WITHIN_TLR4_COMPLEX	16	1018	1182	0.410013	0.726011	0.275021	0.721459	0.589987
REACTOME_CROSS_PRESENTATION_OF_SOLUBLE_EXOGENOUS_ANTIGENS_ENDOSOMES	48	1017	1183	0.409734	0.525033	0.0586585	0.66127	0.590266
REACTOME_EPHB_MEDIATED_FORWARD_SIGNALING	42	1016	1184	0.409267	0.801193	0.122337	0.77633	0.590733
REACTOME_ACTIVATION_OF_TRKA_RECEPTORS	6	1015	1185	0.408851	0.212725	0.375065	0.821717	0.591149
REACTOME_NOTCH1_INTRACELLULAR_DOMAIN_REGULATES_TRANSCRIPTION	47	1014	1186	0.408704	0.651365	0.119373	0.829417	0.591296
REACTOME_SODIUM_PROTON_EXCHANGERS	9	1013	1187	0.408479	0.526837	0.277969	0.71842	0.591521
KEGG_ALANINE_ASPARTATE_AND_GLUTAMATE_METABOLISM	32	1012	1188	0.408458	0.563267	0.0715734	0.690421	0.591542
REACTOME_PHASE_1_INACTIVATION_OF_FAST_NAPLUS_CHANNELS	7	1011	1189	0.408428	0.842096	0.375876	0.39105	0.591572
BIOCARTA_FLUMAZENIL_PATHWAY	9	1010	1190	0.408073	0.799854	0.36275	0.617025	0.591927
REACTOME_RUNX3_REGULATES_BCL2L11_BIM_TRANSCRIPTION	5	1009	1191	0.407323	0.713617	0.368093	0.799886	0.592677
REACTOME_ARMS_MEDIATED_ACTIVATION	7	1008	1192	0.40693	0.445588	0.178773	0.364535	0.59307
REACTOME_TOLL_LIKE_RECEPTOR_9_TLR9_CASCADE	94	1007	1193	0.406882	0.70612	0.0507881	0.698641	0.593118
REACTOME_ASSEMBLY_OF_THE_PRE_REPLICATIVE_COMPLEX	67	1006	1194	0.406318	0.774152	0.0718431	0.736239	0.593682
PID_BMP_PATHWAY	41	1005	1195	0.405079	0.588323	0.135373	0.845146	0.594921
REACTOME_SYNTHESIS_OF_PA	35	1004	1196	0.404497	0.245487	0.0260519	0.475142	0.595503
BIOCARTA_ECM_PATHWAY	19	1003	1197	0.404329	0.770635	0.277744	0.653948	0.595671
REACTOME_ENDOSOMAL_SORTING_COMPLEX_REQUIRED_FOR_TRANSPORT_ESCRT	31	1002	1198	0.404194	0.75564	0.244702	0.82281	0.595806
BIOCARTA_BARRESTIN_SRC_PATHWAY	16	1001	1199	0.403303	0.594345	0.113781	0.521615	0.596697
REACTOME_SEMA3A_PAK_DEPENDENT_AXON_REPULSION	16	1000	1200	0.40223	0.657579	0.172681	0.714441	0.59777
REACTOME_PLASMA_LIPOPROTEIN_REMODELING	31	999	1201	0.402098	0.28059	0.0958697	0.68389	0.597902
REACTOME_SYNTHESIS_OF_KETONE_BODIES	8	998	1202	0.40044	0.188162	0.195179	0.602094	0.59956
BIOCARTA_PTC1_PATHWAY	11	996	1203	0.400419	0.768707	0.147502	0.223969	0.599581
REACTOME_ABC_FAMILY_PROTEINS_MEDIATED_TRANSPORT	102	997	1204	0.400419	0.437223	0.0140487	0.744533	0.599581
REACTOME_ERBB2_REGULATES_CELL_MOTILITY	15	995	1205	0.400411	0.35991	0.166307	0.558471	0.599589
REACTOME_CHL1_INTERACTIONS	9	994	1206	0.400149	0.462516	0.174219	0.513293	0.599851
REACTOME_DCC_MEDIATED_ATTRACTIVE_SIGNALING	14	993	1207	0.399643	0.322827	0.0594077	0.761259	0.600357
REACTOME_HIV_INFECTION	225	992	1208	0.39926	0.705536	0.0341881	0.801996	0.60074
REACTOME_SPERM_MOTILITY_AND_TAXES	9	991	1209	0.398982	0.844732	0.3485	0.851213	0.601018
REACTOME_REGULATION_OF_GENE_EXPRESSION_IN_ENDOCRINE_COMMITTED_NEUROG3PLUS_PROGENITOR_CELLS	5	990	1210	0.398908	0.414859	0.582758	0.646898	0.601092
BIOCARTA_RARRXR_PATHWAY	7	989	1211	0.398408	0.634624	0.307979	0.798413	0.601592
PID_TELOMERASE_PATHWAY	65	988	1212	0.398157	0.507788	0.047955	0.824777	0.601843
REACTOME_MRNA_DECAY_BY_5_TO_3_EXORIBONUCLEASE	15	987	1213	0.397901	0.615648	0.197241	0.726854	0.602099
PID_RET_PATHWAY	39	986	1214	0.397206	0.650094	0.0434461	0.789237	0.602794
BIOCARTA_SLRP_PATHWAY	6	985	1215	0.39699	0.120459	0.0517517	0.428762	0.60301
PID_PI3K_PLC_TRK_PATHWAY	36	984	1216	0.396427	0.538823	0.0814323	0.773784	0.603573
REACTOME_CTLA4_INHIBITORY_SIGNALING	21	983	1217	0.396365	0.202766	0.0608865	0.665045	0.603635
REACTOME_SIGNALING_BY_VEGF	104	982	1218	0.396229	0.414195	0.046118	0.817676	0.603771
BIOCARTA_P35ALZHEIMERS_PATHWAY	8	981	1219	0.395297	0.704899	0.270046	0.710479	0.604703
REACTOME_PHOSPHATE_BOND_HYDROLYSIS_BY_NTPDASE_PROTEINS	8	980	1220	0.394406	0.283485	0.23153	0.549616	0.605594
REACTOME_RESOLUTION_OF_AP_SITES_VIA_THE_MULTIPLE_NUCLEOTIDE_PATCH_REPLACEMENT_PATHWAY	25	979	1221	0.393717	0.722139	0.130511	0.519694	0.606283
REACTOME_TP53_REGULATES_TRANSCRIPTION_OF_ADDITIONAL_CELL_CYCLE_GENES_WHOSE_EXACT_ROLE_IN_THE_P53_PATHWAY_REMAIN_UNCERTAIN	19	978	1222	0.391839	0.537852	0.115687	0.369231	0.608161
REACTOME_SYNTHESIS_OF_PYROPHOSPHATES_IN_THE_CYTOSOL	10	977	1223	0.391395	0.647087	0.184676	0.581666	0.608605
BIOCARTA_PYK2_PATHWAY	27	976	1224	0.390201	0.686796	0.0761032	0.79357	0.609799
REACTOME_NGF_INDEPENDANT_TRKA_ACTIVATION	5	975	1225	0.388718	0.20253	0.360711	0.68625	0.611282
REACTOME_DECTIN_1_MEDIATED_NONCANONICAL_NF_KB_SIGNALING	61	974	1226	0.387223	0.496392	0.075001	0.777065	0.612777
BIOCARTA_NGF_PATHWAY	20	973	1227	0.385982	0.343087	0.0678655	0.483444	0.614018
KEGG_TAURINE_AND_HYPOTAURINE_METABOLISM	10	972	1228	0.385625	0.566566	0.181149	0.503291	0.614375
KEGG_TGF_BETA_SIGNALING_PATHWAY	85	971	1229	0.384873	0.423056	0.00784778	0.726781	0.615127
REACTOME_UPTAKE_AND_FUNCTION_OF_DIPHTHERIA_TOXIN	6	970	1230	0.384747	0.445949	0.233667	0.669347	0.615253
PID_ERBB1_DOWNSTREAM_PATHWAY	105	969	1231	0.384051	0.734817	0.00944766	0.758539	0.615949
REACTOME_ERBB2_ACTIVATES_PTK6_SIGNALING	13	968	1232	0.383333	0.498403	0.114104	0.563574	0.616667
REACTOME_WNT_LIGAND_BIOGENESIS_AND_TRAFFICKING	26	967	1233	0.382827	0.358795	0.103259	0.410607	0.617173
REACTOME_PLATELET_CALCIUM_HOMEOSTASIS	28	966	1234	0.382497	0.670719	0.150949	0.7743	0.617503
REACTOME_UNWINDING_OF_DNA	12	965	1235	0.3821	0.837833	0.361954	0.760512	0.6179
PID_AJDISS_2PATHWAY	48	964	1236	0.381683	0.756113	0.0846046	0.752695	0.618317
REACTOME_METABOLISM_OF_COFACTORS	19	963	1237	0.381383	0.668032	0.146828	0.68823	0.618617
REACTOME_CELLULAR_RESPONSES_TO_EXTERNAL_STIMULI	520	962	1238	0.381236	0.612728	0.0497096	0.794798	0.618764
REACTOME_INLA_MEDIATED_ENTRY_OF_LISTERIA_MONOCYTOGENES_INTO_HOST_CELLS	9	961	1239	0.380254	0.719279	0.240902	0.573119	0.619746
KEGG_MISMATCH_REPAIR	23	960	1240	0.378646	0.74741	0.115283	0.320289	0.621354
REACTOME_OPSINS	9	959	1241	0.378326	0.481292	0.466272	0.639073	0.621674
REACTOME_PLASMA_LIPOPROTEIN_ASSEMBLY_REMODELING_AND_CLEARANCE	70	958	1242	0.377928	0.372113	0.0543181	0.713569	0.622072
REACTOME_PROCESSIVE_SYNTHESIS_ON_THE_LAGGING_STRAND	15	957	1243	0.37783	0.706237	0.155424	0.290248	0.62217
BIOCARTA_PITX2_PATHWAY	16	956	1244	0.376979	0.516044	0.169516	0.727343	0.623021
BIOCARTA_HER2_PATHWAY	23	955	1245	0.376496	0.569312	0.0739267	0.607561	0.623504
REACTOME_HYALURONAN_METABOLISM	16	954	1246	0.375367	0.677286	0.223179	0.782867	0.624633
BIOCARTA_CDC42RAC_PATHWAY	8	953	1247	0.375161	0.450583	0.215169	0.726622	0.624839
REACTOME_AFLATOXIN_ACTIVATION_AND_DETOXIFICATION	19	952	1248	0.374125	0.502816	0.183098	0.704222	0.625875
REACTOME_BICARBONATE_TRANSPORTERS	10	951	1249	0.371323	0.354647	0.177256	0.699935	0.628677
PID_NFAT_3PATHWAY	53	950	1250	0.37052	0.623548	0.0826433	0.813338	0.62948
REACTOME_EPHRIN_SIGNALING	19	949	1251	0.369895	0.734903	0.152142	0.625317	0.630105
REACTOME_TRANSLESION_SYNTHESIS_BY_Y_FAMILY_DNA_POLYMERASES_BYPASSES_LESIONS_ON_DNA_TEMPLATE	37	948	1252	0.369754	0.69858	0.0538639	0.34618	0.630246
REACTOME_CHK1_CHK2_CDS1_MEDIATED_INACTIVATION_OF_CYCLIN_B:CDK1_COMPLEX	13	947	1253	0.369228	0.809992	0.224996	0.546668	0.630772
REACTOME_PEPTIDE_HORMONE_BIOSYNTHESIS	13	946	1254	0.368482	0.691448	0.531164	0.645197	0.631518
REACTOME_RRNA_PROCESSING_IN_THE_MITOCHONDRION	9	945	1255	0.366555	0.643598	0.24321	0.634454	0.633445
REACTOME_PKMTS_METHYLATE_HISTONE_LYSINES	64	944	1256	0.3661	0.766293	0.0928177	0.764627	0.6339
REACTOME_TYROSINE_CATABOLISM	5	943	1257	0.365083	0.847027	0.526264	0.0389527	0.634917
REACTOME_TRANSCRIPTIONAL_REGULATION_BY_MECP2	62	942	1258	0.364301	0.85502	0.282142	0.859377	0.635699
REACTOME_TRANSLESION_SYNTHESIS_BY_POLH	18	941	1259	0.363141	0.753688	0.17951	0.304696	0.636859
REACTOME_INHIBITION_OF_REPLICATION_INITIATION_OF_DAMAGED_DNA_BY_RB1_E2F1	13	940	1260	0.359031	0.544122	0.278903	0.755263	0.640969
BIOCARTA_GCR_PATHWAY	17	939	1261	0.356119	0.611936	0.229289	0.795912	0.643881
REACTOME_ACTIVATION_OF_HOX_GENES_DURING_DIFFERENTIATION	119	938	1262	0.355659	0.65976	0.0772104	0.790459	0.644341
REACTOME_APOPTOTIC_CLEAVAGE_OF_CELLULAR_PROTEINS	37	937	1263	0.355097	0.584606	0.0897873	0.744821	0.644903
REACTOME_CELLULAR_RESPONSES_TO_STRESS	429	936	1264	0.350312	0.567392	0.0266723	0.786919	0.649688
REACTOME_TRANSCRIPTIONAL_REGULATION_BY_SMALL_RNAS	104	935	1265	0.347104	0.648267	0.128003	0.746032	0.652896
KEGG_TYROSINE_METABOLISM	40	934	1266	0.344006	0.586755	0.128871	0.706584	0.655994
REACTOME_CHAPERONE_MEDIATED_AUTOPHAGY	16	933	1267	0.317193	0.0791985	0.136287	0.974035	0.682807
BIOCARTA_VITCB_PATHWAY	11	932	1268	0.315732	0.683418	0.245061	0.456988	0.684268
KEGG_STEROID_BIOSYNTHESIS	17	931	1269	0.315242	0.15101	0.0358432	0.700474	0.684758
REACTOME_SIGNAL_ATTENUATION	10	930	1270	0.313176	0.630604	0.246143	0.741003	0.686824
PID_HDAC_CLASSIII_PATHWAY	26	929	1271	0.311234	0.291863	0.0768585	0.92726	0.688766
REACTOME_REGULATION_OF_MRNA_STABILITY_BY_PROTEINS_THAT_BIND_AU_RICH_ELEMENTS	86	928	1272	0.302884	0.606348	0.0475785	0.914109	0.697116
KEGG_LONG_TERM_DEPRESSION	68	927	1273	0.302806	0.229326	0.0415005	0.882414	0.697194
REACTOME_TRANSPORT_OF_ORGANIC_ANIONS	12	926	1274	0.302158	0.211904	0.122333	0.670009	0.697842
REACTOME_REGULATION_OF_TP53_ACTIVITY_THROUGH_ASSOCIATION_WITH_CO_FACTORS	14	925	1275	0.30048	0.393928	0.11862	0.450884	0.69952
REACTOME_PLATELET_SENSITIZATION_BY_LDL	16	924	1276	0.2995	0.08482	0.0629314	0.816654	0.7005
PID_MYC_REPRESS_PATHWAY	62	923	1277	0.299337	0.394473	0.0340642	0.896403	0.700663
REACTOME_TRIGLYCERIDE_METABOLISM	38	922	1278	0.299019	0.517969	0.128312	0.670555	0.700981
BIOCARTA_CDC25_PATHWAY	9	921	1279	0.297975	0.670102	0.199947	0.483321	0.702025
REACTOME_RET_SIGNALING	41	920	1280	0.29787	0.584692	0.0912716	0.768791	0.70213
REACTOME_TP53_REGULATES_TRANSCRIPTION_OF_CASPASE_ACTIVATORS_AND_CASPASES	11	919	1281	0.297123	0.566356	0.177005	0.742951	0.702877
REACTOME_TRAFFICKING_OF_GLUR2_CONTAINING_AMPA_RECEPTORS	17	918	1282	0.296071	0.446437	0.052116	0.284201	0.703929
KEGG_HOMOLOGOUS_RECOMBINATION	26	917	1283	0.294124	0.48651	0.0368996	0.172374	0.705876
SIG_IL4RECEPTOR_IN_B_LYPHOCYTES	27	916	1284	0.293091	0.357827	0.0503578	0.52179	0.706909
NABA_PROTEOGLYCANS	35	915	1285	0.292461	0.105166	0.0249669	0.389602	0.707539
REACTOME_EICOSANOID_LIGAND_BINDING_RECEPTORS	15	914	1286	0.292339	0.492986	0.277737	0.876644	0.707661
REACTOME_TICAM1_RIP1_MEDIATED_IKK_COMPLEX_RECRUITMENT	19	913	1287	0.292188	0.439519	0.0550134	0.376067	0.707812
PID_CERAMIDE_PATHWAY	44	912	1288	0.291817	0.535371	0.128054	0.886148	0.708183
REACTOME_DEFECTIVE_CHSY1_CAUSES_TPBS	8	911	1289	0.28992	0.182451	0.293921	0.946177	0.71008
REACTOME_PRE_NOTCH_PROCESSING_IN_THE_ENDOPLASMIC_RETICULUM	6	910	1290	0.288977	0.415067	0.287894	0.813768	0.711023
REACTOME_DNA_REPLICATION	126	909	1291	0.288852	0.914971	0.0496033	0.853605	0.711148
REACTOME_MELANIN_BIOSYNTHESIS	5	908	1292	0.288694	0.284692	0.216833	0.79749	0.711306
REACTOME_GLUTATHIONE_CONJUGATION	36	907	1293	0.288298	0.637463	0.0501057	0.503484	0.711702
REACTOME_SYNTHESIS_OF_PIPS_AT_THE_PLASMA_MEMBRANE	53	906	1294	0.2879	0.177635	0.0253565	0.245992	0.7121
REACTOME_DEFECTIVE_CSF2RB_CAUSES_PULMONARY_SURFACTANT_METABOLISM_DYSFUNCTION_5_SMDP5	8	905	1295	0.28765	0.654081	0.627734	0.66944	0.71235
REACTOME_PROSTANOID_LIGAND_RECEPTORS	9	904	1296	0.287081	0.583416	0.296637	0.859556	0.712919
BIOCARTA_RACCYCD_PATHWAY	26	903	1297	0.286918	0.866956	0.343585	0.902955	0.713082
REACTOME_METABOLISM_OF_NUCLEOTIDES	97	902	1298	0.286634	0.688117	0.027089	0.736263	0.713366
KEGG_ADIPOCYTOKINE_SIGNALING_PATHWAY	67	901	1299	0.286444	0.160204	0.000451532	0.764997	0.713556
BIOCARTA_MITOCHONDRIA_PATHWAY	19	900	1300	0.285989	0.57173	0.134731	0.804872	0.714011
REACTOME_SIGNALING_BY_MST1	5	899	1301	0.285605	0.181592	0.115995	0.566816	0.714395
REACTOME_PCNA_DEPENDENT_LONG_PATCH_BASE_EXCISION_REPAIR	21	898	1302	0.285198	0.781004	0.191646	0.618508	0.714802
REACTOME_NETRIN_1_SIGNALING	49	897	1303	0.285112	0.363899	0.0550014	0.906604	0.714888
BIOCARTA_NOTCH_PATHWAY	6	896	1304	0.284251	0.445199	0.306172	0.839946	0.715749
KEGG_PROSTATE_CANCER	89	894	1305	0.284153	0.46307	0.0144183	0.883443	0.715847
REACTOME_SOS_MEDIATED_SIGNALLING	7	895	1306	0.284153	0.327536	0.202218	0.76999	0.715847
REACTOME_MUSCLE_CONTRACTION	204	893	1307	0.283528	0.830654	0.0041146	0.731965	0.716472
REACTOME_CONDENSATION_OF_PROMETAPHASE_CHROMOSOMES	11	892	1308	0.282889	0.726381	0.328123	0.872174	0.717111
KEGG_REGULATION_OF_AUTOPHAGY	34	891	1309	0.282788	0.61049	0.386085	0.641885	0.717212
KEGG_LYSOSOME	121	890	1310	0.282291	0.136505	0.000194758	0.938021	0.717709
REACTOME_MITOTIC_G1_G1_S_PHASES	148	889	1311	0.281549	0.911137	0.0410195	0.85175	0.718451
REACTOME_PHASE_4_RESTING_MEMBRANE_POTENTIAL	19	888	1312	0.279744	0.503111	0.0964416	0.0528619	0.720256
BIOCARTA_PLC_PATHWAY	9	887	1313	0.279742	0.169177	0.0582867	0.434134	0.720258
REACTOME_SYNTHESIS_OF_BILE_ACIDS_AND_BILE_SALTS_VIA_24_HYDROXYCHOLESTEROL	14	886	1314	0.278868	0.58415	0.165343	0.287328	0.721132
REACTOME_REDUCTION_OF_CYTOSOLIC_CAPLUSPLUS_LEVELS	12	885	1315	0.278531	0.865497	0.279741	0.903535	0.721469
REACTOME_GOLGI_CISTERNAE_PERICENTRIOLAR_STACK_REORGANIZATION	14	884	1316	0.278234	0.778323	0.319978	0.884754	0.721766
KEGG_PANTOTHENATE_AND_COA_BIOSYNTHESIS	16	883	1317	0.276921	0.424882	0.113629	0.685284	0.723079
REACTOME_SIGNALING_BY_NOTCH4	81	882	1318	0.276333	0.746104	0.044579	0.916932	0.723667
PID_MAPK_TRK_PATHWAY	34	881	1319	0.275541	0.790183	0.180165	0.762807	0.724459
REACTOME_EXTENSION_OF_TELOMERES	30	880	1320	0.275373	0.816893	0.165716	0.810935	0.724627
BIOCARTA_NPP1_PATHWAY	10	879	1321	0.275255	0.45634	0.177401	0.665699	0.724745
KEGG_FRUCTOSE_AND_MANNOSE_METABOLISM	33	878	1322	0.274907	0.553936	0.0572122	0.669253	0.725093
BIOCARTA_CXCR4_PATHWAY	19	877	1323	0.273764	0.72354	0.202559	0.826987	0.726236
REACTOME_AMINO_ACID_CONJUGATION	9	876	1324	0.272094	0.687381	0.525745	0.86136	0.727906
REACTOME_G1_S_DNA_DAMAGE_CHECKPOINTS	66	875	1325	0.270797	0.714965	0.113605	0.863446	0.729203
REACTOME_EGFR_INTERACTS_WITH_PHOSPHOLIPASE_C_GAMMA	9	874	1326	0.269849	0.068288	0.0880705	0.344286	0.730151
KEGG_AMYOTROPHIC_LATERAL_SCLEROSIS_ALS	53	873	1327	0.269691	0.627459	0.0459706	0.872265	0.730309
REACTOME_TP53_REGULATES_TRANSCRIPTION_OF_GENES_INVOLVED_IN_CYTOCHROME_C_RELEASE	19	872	1328	0.268707	0.616163	0.126047	0.622784	0.731293
REACTOME_BETA_OXIDATION_OF_VERY_LONG_CHAIN_FATTY_ACIDS	11	871	1329	0.268703	0.763533	0.282997	0.6934	0.731297
KEGG_BLADDER_CANCER	40	870	1330	0.267714	0.688134	0.106398	0.88295	0.732286
REACTOME_THYROXINE_BIOSYNTHESIS	10	869	1331	0.267679	0.897619	0.306999	0.43353	0.732321
REACTOME_G2_M_CHECKPOINTS	163	868	1332	0.267212	0.875036	0.0776495	0.880797	0.732788
REACTOME_DNA_REPLICATION_PRE_INITIATION	84	867	1333	0.266889	0.92508	0.118767	0.841104	0.733111
REACTOME_IRS_ACTIVATION	5	866	1334	0.266676	0.58814	0.390892	0.746868	0.733324
REACTOME_RECYCLING_PATHWAY_OF_L1	47	865	1335	0.266468	0.487501	0.0544039	0.418357	0.733532
KEGG_ACUTE_MYELOID_LEUKEMIA	57	864	1336	0.266195	0.784035	0.051585	0.844283	0.733805
REACTOME_MULTIFUNCTIONAL_ANION_EXCHANGERS	9	863	1337	0.264565	0.302095	0.184135	0.522817	0.735435
REACTOME_SYNTHESIS_OF_BILE_ACIDS_AND_BILE_SALTS	34	862	1338	0.264528	0.40564	0.0104698	0.00687637	0.735472
REACTOME_LDL_CLEARANCE	19	861	1339	0.263205	0.384393	0.153188	0.57912	0.736795
REACTOME_ESTROGEN_BIOSYNTHESIS	6	860	1340	0.262911	0.159085	0.122806	0.211489	0.737089
REACTOME_SEROTONIN_RECEPTORS	12	859	1341	0.261908	0.664962	0.657491	0.830985	0.738092
BIOCARTA_ARAP_PATHWAY	17	858	1342	0.261882	0.826846	0.201057	0.497018	0.738118
REACTOME_FGFR1_MUTANT_RECEPTOR_ACTIVATION	31	857	1343	0.261377	0.837907	0.277734	0.868231	0.738623
KEGG_STEROID_HORMONE_BIOSYNTHESIS	55	856	1344	0.261026	0.0640489	0.117929	0.462409	0.738974
BIOCARTA_RHODOPSIN_PATHWAY	10	855	1345	0.259837	0.243979	0.2923	0.856188	0.740163
REACTOME_GLYOXYLATE_METABOLISM_AND_GLYCINE_DEGRADATION	31	854	1346	0.259562	0.717288	0.196665	0.777711	0.740438
REACTOME_MYD88_CASCADE_INITIATED_ON_PLASMA_MEMBRANE	84	853	1347	0.258994	0.599069	0.0750544	0.820881	0.741006
KEGG_GLIOMA	65	852	1348	0.258138	0.328155	0.0216743	0.879707	0.741862
PID_ERA_GENOMIC_PATHWAY	63	851	1349	0.258082	0.547675	0.0484851	0.867512	0.741918
REACTOME_RUNX1_AND_FOXP3_CONTROL_THE_DEVELOPMENT_OF_REGULATORY_T_LYMPHOCYTES_TREGS	10	850	1350	0.257311	0.191777	0.0441531	0.420154	0.742689
REACTOME_TAK1_ACTIVATES_NFKB_BY_PHOSPHORYLATION_AND_ACTIVATION_OF_IKKS_COMPLEX	32	849	1351	0.256776	0.737156	0.092948	0.676632	0.743224
REACTOME_SUMOYLATION_OF_IMMUNE_RESPONSE_PROTEINS	11	848	1352	0.255864	0.387611	0.215218	0.865522	0.744136
REACTOME_RUNX1_REGULATES_TRANSCRIPTION_OF_GENES_INVOLVED_IN_INTERLEUKIN_SIGNALING	5	847	1353	0.255775	0.175848	0.146351	0.549374	0.744225
REACTOME_G2_M_DNA_REPLICATION_CHECKPOINT	5	846	1354	0.253655	0.896349	0.404137	0.0552123	0.746345
REACTOME_NAPLUS_CL_DEPENDENT_NEUROTRANSMITTER_TRANSPORTERS	19	845	1355	0.253571	0.296583	0.186157	0.614284	0.746429
REACTOME_NECTIN_NECL_TRANS_HETERODIMERIZATION	3	844	1356	0.253475	0.462469	0.281292	0.736666	0.746525
REACTOME_SLC_TRANSPORTER_DISORDERS	99	843	1357	0.253324	0.272354	0.00570396	0.588568	0.746676
REACTOME_VASOPRESSIN_LIKE_RECEPTORS	6	842	1358	0.252951	0.42098	0.155639	0.0632979	0.747049
BIOCARTA_BAD_PATHWAY	25	841	1359	0.251903	0.698609	0.275687	0.920045	0.748097
BIOCARTA_EGF_PATHWAY	27	840	1360	0.251597	0.436739	0.0413448	0.546693	0.748403
PID_IL3_PATHWAY	26	839	1361	0.251565	0.655344	0.177105	0.84017	0.748435
REACTOME_SIGNALING_BY_MODERATE_KINASE_ACTIVITY_BRAF_MUTANTS	45	838	1362	0.251434	0.759611	0.0175761	0.502825	0.748566
REACTOME_UBIQUINOL_BIOSYNTHESIS	8	837	1363	0.250724	0.541263	0.214516	0.716129	0.749276
REACTOME_POST_CHAPERONIN_TUBULIN_FOLDING_PATHWAY	23	836	1364	0.250557	0.400624	0.157251	0.476428	0.749443
REACTOME_NRIF_SIGNALS_CELL_DEATH_FROM_THE_NUCLEUS	16	835	1365	0.250477	0.701657	0.296987	0.876367	0.749523
REACTOME_TNFR1_INDUCED_PROAPOPTOTIC_SIGNALING	13	834	1366	0.249529	0.579355	0.105857	0.494818	0.750471
REACTOME_PI3K_EVENTS_IN_ERBB2_SIGNALING	16	833	1367	0.248456	0.383663	0.0648231	0.671611	0.751544
REACTOME_INTERACTION_BETWEEN_L1_AND_ANKYRINS	31	832	1368	0.248169	0.68858	0.0431093	0.440244	0.751831
BIOCARTA_LEPTIN_PATHWAY	11	831	1369	0.247903	0.411354	0.284687	0.926452	0.752097
REACTOME_SPHINGOLIPID_METABOLISM	85	830	1370	0.24701	0.739758	0.0437469	0.74124	0.75299
REACTOME_JOSEPHIN_DOMAIN_DUBS	11	829	1371	0.246821	0.770903	0.273905	0.673949	0.753179
KEGG_PRION_DISEASES	35	828	1372	0.24659	0.380792	0.0603538	0.802961	0.75341
PID_CONE_PATHWAY	22	827	1373	0.246529	0.632559	0.266737	0.403667	0.753471
KEGG_PENTOSE_PHOSPHATE_PATHWAY	25	826	1374	0.246151	0.443764	0.0910211	0.761024	0.753849
BIOCARTA_AT1R_PATHWAY	27	825	1375	0.24418	0.532486	0.0431912	0.716364	0.75582
REACTOME_P38MAPK_EVENTS	13	824	1376	0.243772	0.433392	0.129785	0.752202	0.756228
REACTOME_BUTYRATE_RESPONSE_FACTOR_1_BRF1_BINDS_AND_DESTABILIZES_MRNA	17	823	1377	0.242301	0.794081	0.213384	0.795383	0.757699
REACTOME_MASTL_FACILITATES_MITOTIC_PROGRESSION	10	822	1378	0.24219	0.626633	0.212671	0.752547	0.75781
PID_NEPHRIN_NEPH1_PATHWAY	30	821	1379	0.241608	0.760809	0.0997034	0.77473	0.758392
REACTOME_LAGGING_STRAND_SYNTHESIS	20	820	1380	0.241507	0.829135	0.160212	0.445015	0.758493
REACTOME_SIGNALLING_TO_ERKS	32	819	1381	0.241184	0.385606	0.0489533	0.693435	0.758816
REACTOME_REGULATION_OF_RUNX3_EXPRESSION_AND_ACTIVITY	54	818	1382	0.240581	0.530492	0.0952854	0.763965	0.759419
REACTOME_PROPIONYL_COA_CATABOLISM	4	817	1383	0.24017	0.709402	0.365409	0.820427	0.75983
REACTOME_CLATHRIN_MEDIATED_ENDOCYTOSIS	143	816	1384	0.239713	0.464427	0.0268257	0.855443	0.760287
KEGG_PYRIMIDINE_METABOLISM	98	815	1385	0.239236	0.758249	0.0302858	0.834496	0.760764
REACTOME_KETONE_BODY_METABOLISM	10	814	1386	0.23866	0.300094	0.190826	0.667373	0.76134
REACTOME_FORMATION_OF_ATP_BY_CHEMIOSMOTIC_COUPLING	2	813	1387	0.238524	0.698641	0.372263	0.251046	0.761476
REACTOME_REMOVAL_OF_AMINOTERMINAL_PROPEPTIDES_FROM_GAMMA_CARBOXYLATED_PROTEINS	10	812	1388	0.23761	0.582497	0.285679	0.702555	0.76239
BIOCARTA_TGFB_PATHWAY	19	811	1389	0.236892	0.895714	0.148438	0.774776	0.763108
REACTOME_SHC1_EVENTS_IN_EGFR_SIGNALING	14	810	1390	0.236247	0.090297	0.0669514	0.558425	0.763753
REACTOME_BIOSYNTHESIS_OF_E_SERIES_18_S_RESOLVINS	5	809	1391	0.235942	0.135785	0.0637596	0.277494	0.764058
REACTOME_TP53_REGULATES_TRANSCRIPTION_OF_CELL_DEATH_GENES	42	808	1392	0.23577	0.614352	0.048329	0.825369	0.76423
BIOCARTA_ETS_PATHWAY	17	807	1393	0.235379	0.618089	0.132295	0.770858	0.764621
BIOCARTA_BTG2_PATHWAY	11	806	1394	0.233992	0.48666	0.165581	0.717929	0.766008
REACTOME_RRNA_MODIFICATION_IN_THE_MITOCHONDRION	5	805	1395	0.233697	0.667517	0.298208	0.588399	0.766303
REACTOME_GRB2_EVENTS_IN_ERBB2_SIGNALING	16	804	1396	0.233494	0.384275	0.0659235	0.667516	0.766506
REACTOME_SIGNALING_BY_RHO_GTPASES	443	803	1397	0.233057	0.807185	0.00571299	0.863054	0.766943
REACTOME_CHONDROITIN_SULFATE_BIOSYNTHESIS	20	802	1398	0.232534	0.363594	0.0983219	0.840938	0.767466
BIOCARTA_HSP27_PATHWAY	14	801	1399	0.232505	0.153967	0.0267958	0.650111	0.767495
REACTOME_ASSEMBLY_OF_THE_ORC_COMPLEX_AT_THE_ORIGIN_OF_REPLICATION	6	800	1400	0.231118	0.580294	0.161922	0.0429632	0.768882
BIOCARTA_IFNA_PATHWAY	9	799	1401	0.230196	0.699106	0.402717	0.839177	0.769804
REACTOME_PENTOSE_PHOSPHATE_PATHWAY	13	798	1402	0.229967	0.571627	0.165014	0.82084	0.770033
BIOCARTA_ATRBRCA_PATHWAY	22	797	1403	0.229867	0.609023	0.174193	0.853651	0.770133
REACTOME_EARLY_PHASE_OF_HIV_LIFE_CYCLE	14	796	1404	0.229832	0.581742	0.203802	0.858558	0.770168
REACTOME_ACTIVATION_OF_NOXA_AND_TRANSLOCATION_TO_MITOCHONDRIA	5	795	1405	0.229767	0.494913	0.314785	0.883176	0.770233
REACTOME_DNA_DOUBLE_STRAND_BREAK_RESPONSE	73	794	1406	0.229438	0.762568	0.196659	0.853632	0.770562
REACTOME_DISINHIBITION_OF_SNARE_FORMATION	5	793	1407	0.227752	0.221632	0.136353	0.369412	0.772248
REACTOME_POLO_LIKE_KINASE_MEDIATED_EVENTS	16	792	1408	0.227376	0.811291	0.16686	0.720723	0.772624
REACTOME_SIGNALING_BY_NOTCH1_HD_DOMAIN_MUTANTS_IN_CANCER	14	791	1409	0.226847	0.728243	0.161787	0.543493	0.773153
REACTOME_FATTY_ACIDS	15	790	1410	0.225267	0.387075	0.385321	0.721993	0.774733
REACTOME_LIPOPHAGY	9	789	1411	0.225175	0.227804	0.246135	0.954635	0.774825
PID_TRAIL_PATHWAY	28	788	1412	0.225131	0.693929	0.135823	0.792027	0.774869
REACTOME_METABOLISM_OF_LIPIDS	711	787	1413	0.224876	0.0628907	0.00503782	0.216613	0.775124
REACTOME_GDP_FUCOSE_BIOSYNTHESIS	5	786	1414	0.224746	0.518066	0.289179	0.88416	0.775254
REACTOME_NEUROTOXICITY_OF_CLOSTRIDIUM_TOXINS	10	785	1415	0.223694	0.318305	0.0544094	0.215908	0.776306
REACTOME_DEFECTIVE_B4GALT1_CAUSES_B4GALT1_CDG_CDG_2D	8	784	1416	0.223139	0.310889	0.165511	0.583025	0.776861
BIOCARTA_LONGEVITY_PATHWAY	15	783	1417	0.223029	0.321112	0.154257	0.828125	0.776971
BIOCARTA_G2_PATHWAY	24	782	1418	0.222712	0.861699	0.216042	0.7691	0.777288
REACTOME_NUCLEOTIDE_LIKE_PURINERGIC_RECEPTORS	16	781	1419	0.22245	0.575442	0.191326	0.433518	0.77755
REACTOME_E2F_ENABLED_INHIBITION_OF_PRE_REPLICATION_COMPLEX_FORMATION	9	780	1420	0.221861	0.809204	0.200695	0.0422498	0.778139
REACTOME_TRAF3_DEPENDENT_IRF_ACTIVATION_PATHWAY	14	779	1421	0.221768	0.630254	0.155913	0.510501	0.778232
REACTOME_RAF_INDEPENDENT_MAPK1_3_ACTIVATION	23	778	1422	0.221089	0.453854	0.074338	0.796151	0.778911
PID_ALK1_PATHWAY	26	777	1423	0.220922	0.639089	0.148684	0.882258	0.779078
KEGG_RENAL_CELL_CARCINOMA	66	776	1424	0.22034	0.155119	0.000577325	0.801228	0.77966
REACTOME_ABC_TRANSPORTER_DISORDERS	76	775	1425	0.21945	0.473999	0.0574157	0.823743	0.78055
BIOCARTA_P38MAPK_PATHWAY	36	774	1426	0.218224	0.620342	0.0100404	0.448261	0.781776
REACTOME_DNA_REPLICATION_INITIATION	8	773	1427	0.218126	0.746248	0.281236	0.890517	0.781874
REACTOME_BLOOD_GROUP_SYSTEMS_BIOSYNTHESIS	21	771	1428	0.216691	0.266765	0.199567	0.838152	0.783309
REACTOME_SIGNALING_BY_NUCLEAR_RECEPTORS	261	772	1429	0.216691	0.682244	0.00950878	0.91505	0.783309
REACTOME_NOTCH4_ACTIVATION_AND_TRANSMISSION_OF_SIGNAL_TO_THE_NUCLEUS	11	770	1430	0.21666	0.663706	0.188266	0.78794	0.78334
REACTOME_STIMULI_SENSING_CHANNELS	106	769	1431	0.216594	0.564	0.0146928	0.564196	0.783406
REACTOME_MET_INTERACTS_WITH_TNS_PROTEINS	5	768	1432	0.215875	0.623723	0.239238	0.383223	0.784125
REACTOME_RHO_GTPASES_ACTIVATE_IQGAPS	31	767	1433	0.215756	0.804438	0.188869	0.515645	0.784244
REACTOME_TRNA_PROCESSING_IN_THE_MITOCHONDRION	7	766	1434	0.215656	0.621475	0.235248	0.731769	0.784344
REACTOME_FERTILIZATION	26	765	1435	0.215543	0.807133	0.339822	0.657557	0.784457
REACTOME_NEUROTRANSMITTER_CLEARANCE	10	764	1436	0.215007	0.0820946	0.170668	0.924546	0.784993
BIOCARTA_DNAFRAGMENT_PATHWAY	10	763	1437	0.214439	0.636501	0.175498	0.63497	0.785561
REACTOME_METABOLISM_OF_STEROIDS	147	762	1438	0.212931	0.168156	0.0076261	0.246713	0.787069
REACTOME_UCH_PROTEINASES	101	761	1439	0.212689	0.413518	0.0652807	0.929379	0.787311
REACTOME_SHC1_EVENTS_IN_ERBB4_SIGNALING	14	760	1440	0.212348	0.338285	0.079842	0.730784	0.787652
REACTOME_EPH_EPHRIN_SIGNALING	92	759	1441	0.212347	0.853326	0.0546139	0.913603	0.787653
KEGG_P53_SIGNALING_PATHWAY	65	758	1442	0.212325	0.732652	0.0147738	0.862086	0.787675
REACTOME_ACYL_CHAIN_REMODELLING_OF_PC	26	757	1443	0.212061	0.278846	0.197959	0.911359	0.787939
REACTOME_SYNTHESIS_OF_12_EICOSATETRAENOIC_ACID_DERIVATIVES	7	756	1444	0.211959	0.635339	0.224452	0.378364	0.788041
REACTOME_GAMMA_CARBOXYLATION_TRANSPORT_AND_AMINO_TERMINAL_CLEAVAGE_OF_PROTEINS	11	755	1445	0.211806	0.617738	0.287458	0.701972	0.788194
REACTOME_DNA_STRAND_ELONGATION	32	754	1446	0.211538	0.916922	0.223833	0.662904	0.788462
REACTOME_AMINO_ACID_TRANSPORT_ACROSS_THE_PLASMA_MEMBRANE	33	753	1447	0.211513	0.0406938	0.0116306	0.487255	0.788487
REACTOME_SIGNALING_BY_TGF_BETA_FAMILY_MEMBERS	102	752	1448	0.211054	0.120544	0.0587542	0.912019	0.788946
REACTOME_ABACAVIR_TRANSPORT_AND_METABOLISM	10	751	1449	0.210461	0.784291	0.282655	0.605161	0.789539
KEGG_PANCREATIC_CANCER	69	750	1450	0.210243	0.593965	0.027632	0.836146	0.789757
REACTOME_PROTON_COUPLED_MONOCARBOXYLATE_TRANSPORT	6	749	1451	0.210055	0.635477	0.268081	0.400452	0.789945
KEGG_PPAR_SIGNALING_PATHWAY	69	748	1452	0.209987	0.397457	0.00281217	0.755589	0.790013
REACTOME_TRIF_MEDIATED_PROGRAMMED_CELL_DEATH	9	747	1453	0.209514	0.648895	0.220992	0.580021	0.790486
REACTOME_STAT5_ACTIVATION	7	746	1454	0.209467	0.553989	0.260419	0.808423	0.790533
REACTOME_ZINC_TRANSPORTERS	17	745	1455	0.208841	0.656357	0.164142	0.633923	0.791159
REACTOME_GAB1_SIGNALOSOME	17	744	1456	0.208689	0.0900341	0.0593479	0.654034	0.791311
PID_P38_MK2_PATHWAY	21	743	1457	0.208632	0.863555	0.121118	0.819703	0.791368
REACTOME_BIOSYNTHESIS_OF_EPA_DERIVED_SPMS	6	742	1458	0.208406	0.197364	0.0707752	0.26302	0.791594
REACTOME_IRF3_MEDIATED_INDUCTION_OF_TYPE_I_IFN	12	741	1459	0.208364	0.695334	0.173758	0.469684	0.791636
REACTOME_RECYCLING_OF_BILE_ACIDS_AND_SALTS	16	740	1460	0.208199	0.272154	0.103107	0.0951799	0.791801
BIOCARTA_BCELLSURVIVAL_PATHWAY	15	739	1461	0.208049	0.661676	0.2132	0.831427	0.791951
BIOCARTA_P53HYPOXIA_PATHWAY	21	738	1462	0.207752	0.841735	0.151581	0.530079	0.792248
BIOCARTA_PKC_PATHWAY	7	737	1463	0.207362	0.0816036	0.0800815	0.596601	0.792638
REACTOME_ACTIVATION_OF_THE_PRE_REPLICATIVE_COMPLEX	33	736	1464	0.207352	0.889274	0.153462	0.634812	0.792648
REACTOME_VEGF_LIGAND_RECEPTOR_INTERACTIONS	7	735	1465	0.207245	0.712048	0.321966	0.925874	0.792755
BIOCARTA_PPARG_PATHWAY	8	734	1466	0.206863	0.337172	0.211244	0.865125	0.793137
REACTOME_TRANSPORT_OF_CONNEXONS_TO_THE_PLASMA_MEMBRANE	20	733	1467	0.206694	0.478887	0.166249	0.383736	0.793306
REACTOME_TIE2_SIGNALING	18	732	1468	0.206322	0.116169	0.0962107	0.873043	0.793678
REACTOME_E3_UBIQUITIN_LIGASES_UBIQUITINATE_TARGET_PROTEINS	58	731	1469	0.203834	0.896124	0.210717	0.943532	0.796166
BIOCARTA_STEM_PATHWAY	14	730	1470	0.20382	0.192781	0.137869	0.173286	0.79618
REACTOME_NETRIN_MEDIATED_REPULSION_SIGNALS	8	729	1471	0.203761	0.527181	0.257311	0.864045	0.796239
REACTOME_GLUTAMATE_BINDING_ACTIVATION_OF_AMPA_RECEPTORS_AND_SYNAPTIC_PLASTICITY	31	728	1472	0.202926	0.65722	0.0899623	0.437653	0.797074
PID_P75_NTR_PATHWAY	66	727	1473	0.202129	0.384475	0.0150084	0.87975	0.797871
REACTOME_HOST_INTERACTIONS_OF_HIV_FACTORS	127	726	1474	0.201827	0.557963	0.0315065	0.93792	0.798173
KEGG_NEUROTROPHIN_SIGNALING_PATHWAY	125	725	1475	0.201419	0.406442	0.00688051	0.883735	0.798581
REACTOME_CARDIAC_CONDUCTION	138	724	1476	0.200928	0.798603	0.0268533	0.761109	0.799072
PID_FAK_PATHWAY	58	723	1477	0.200329	0.198564	0.0167809	0.876111	0.799671
KEGG_GNRH_SIGNALING_PATHWAY	101	722	1478	0.200058	0.778695	0.00328891	0.810452	0.799942
REACTOME_DOWNREGULATION_OF_TGF_BETA_RECEPTOR_SIGNALING	26	721	1479	0.199363	0.328282	0.0396909	0.601275	0.800637
REACTOME_REGULATION_OF_INSULIN_LIKE_GROWTH_FACTOR_IGF_TRANSPORT_AND_UPTAKE_BY_INSULIN_LIKE_GROWTH_FACTOR_BINDING_PROTEINS_IGFBPS	122	720	1480	0.199166	0.542624	0.00397891	0.810333	0.800834
REACTOME_ETHANOL_OXIDATION	12	719	1481	0.198902	0.489771	0.314561	0.890543	0.801098
REACTOME_CDC6_ASSOCIATION_WITH_THE_ORC:ORIGIN_COMPLEX	11	718	1482	0.19876	0.691377	0.161567	0.565688	0.80124
REACTOME_RUNX3_REGULATES_IMMUNE_RESPONSE_AND_CELL_MIGRATION	6	717	1483	0.198716	0.460261	0.12531	0.354299	0.801284
PID_BETA_CATENIN_NUC_PATHWAY	76	716	1484	0.19746	0.595448	0.0599284	0.885574	0.80254
REACTOME_EGFR_DOWNREGULATION	31	715	1485	0.195785	0.276711	0.0281673	0.700921	0.804215
BIOCARTA_ERK5_PATHWAY	14	714	1486	0.194946	0.369455	0.0587075	0.574353	0.805054
REACTOME_VOLTAGE_GATED_POTASSIUM_CHANNELS	43	713	1487	0.19419	0.553633	0.0114099	0.0934244	0.80581
REACTOME_TRIF_TICAM1_MEDIATED_TLR4_SIGNALING	97	712	1488	0.194081	0.795785	0.0871702	0.884448	0.805919
REACTOME_EPH_EPHRIN_MEDIATED_REPULSION_OF_CELLS	51	711	1489	0.191975	0.791792	0.0610503	0.771295	0.808025
REACTOME_BILE_ACID_AND_BILE_SALT_METABOLISM	43	710	1490	0.19191	0.268074	0.00398271	0.0146516	0.80809
REACTOME_REACTIONS_SPECIFIC_TO_THE_COMPLEX_N_GLYCAN_SYNTHESIS_PATHWAY	10	709	1491	0.191595	0.567828	0.281522	0.739572	0.808405
REACTOME_OXIDATIVE_STRESS_INDUCED_SENESCENCE	123	708	1492	0.191298	0.692694	0.0753298	0.922114	0.808702
REACTOME_CELLULAR_SENESCENCE	190	707	1493	0.191152	0.747976	0.0466047	0.880127	0.808848
REACTOME_METALLOPROTEASE_DUBS	34	706	1494	0.190872	0.567648	0.149433	0.853073	0.809128
PID_VEGF_VEGFR_PATHWAY	9	705	1495	0.190537	0.695673	0.2922	0.930798	0.809463
PID_IL2_PI3K_PATHWAY	34	704	1496	0.190387	0.12258	0.0444045	0.876874	0.809613
REACTOME_RESPONSE_TO_METAL_IONS	14	703	1497	0.190359	0.606629	0.299408	0.940904	0.809641
REACTOME_AMYLOID_FIBER_FORMATION	106	702	1498	0.188649	0.454855	0.097703	0.849168	0.811351
REACTOME_PHASE_0_RAPID_DEPOLARISATION	44	701	1499	0.188161	0.696141	0.142421	0.868295	0.811839
BIOCARTA_EDG1_PATHWAY	22	700	1500	0.188145	0.158786	0.033067	0.85461	0.811855
BIOCARTA_RB_PATHWAY	13	699	1501	0.188057	0.715928	0.163444	0.604662	0.811943
REACTOME_TELOMERE_C_STRAND_LAGGING_STRAND_SYNTHESIS	24	698	1502	0.187046	0.845148	0.163166	0.699571	0.812954
BIOCARTA_ERBB4_PATHWAY	7	697	1503	0.186972	0.146904	0.0837425	0.644415	0.813028
REACTOME_POU5F1_OCT4_SOX2_NANOG_REPRESS_GENES_RELATED_TO_DIFFERENTIATION	10	696	1504	0.186949	0.663922	0.284829	0.929786	0.813051
REACTOME_TOLL_LIKE_RECEPTOR_TLR1:TLR2_CASCADE	97	695	1505	0.183198	0.706653	0.0520101	0.871113	0.816802
REACTOME_PHASE_3_RAPID_REPOLARISATION	7	694	1506	0.182868	0.171174	0.12304	0.716553	0.817132
REACTOME_MAPK_FAMILY_SIGNALING_CASCADES	295	693	1507	0.182463	0.891637	0.00548968	0.945384	0.817537
REACTOME_CA2PLUS_ACTIVATED_KPLUS_CHANNELS	8	692	1508	0.182359	0.540799	0.181487	0.811368	0.817641
REACTOME_SIGNALING_BY_ERBB4	58	691	1509	0.181457	0.405654	0.0497582	0.912585	0.818543
REACTOME_ATF4_ACTIVATES_GENES_IN_RESPONSE_TO_ENDOPLASMIC_RETICULUM_STRESS	25	690	1510	0.181232	0.500247	0.121843	0.907902	0.818768
PID_CDC42_PATHWAY	70	689	1511	0.180886	0.91797	0.201138	0.921624	0.819114
REACTOME_TRAF6_MEDIATED_NF_KB_ACTIVATION	24	688	1512	0.180361	0.723589	0.0813307	0.148931	0.819639
BIOCARTA_EFP_PATHWAY	16	687	1513	0.180202	0.726773	0.197951	0.805042	0.819798
REACTOME_PROTEIN_REPAIR	6	686	1514	0.180076	0.615431	0.292442	0.921703	0.819924
REACTOME_DEVELOPMENTAL_BIOLOGY	1095	685	1515	0.179379	0.828573	0.00548255	0.843078	0.820621
REACTOME_SIGNALING_BY_NOTCH1_IN_CANCER	57	684	1516	0.179363	0.748611	0.0945974	0.942482	0.820637
REACTOME_INLB_MEDIATED_ENTRY_OF_LISTERIA_MONOCYTOGENES_INTO_HOST_CELL	15	683	1517	0.178726	0.477338	0.118505	0.748758	0.821274
REACTOME_CYTOSOLIC_SENSORS_OF_PATHOGEN_ASSOCIATED_DNA	61	682	1518	0.177268	0.873977	0.0675025	0.76159	0.822732
BIOCARTA_RNA_PATHWAY	10	681	1519	0.176559	0.457119	0.183769	0.809616	0.823441
REACTOME_MET_ACTIVATES_PTPN11	5	680	1520	0.176148	0.235404	0.111465	0.538661	0.823852
REACTOME_PIWI_INTERACTING_RNA_PIRNA_BIOGENESIS	28	679	1521	0.175337	0.628516	0.0678496	0.616244	0.824663
REACTOME_TRIGLYCERIDE_BIOSYNTHESIS	14	678	1522	0.174079	0.349328	0.066136	0.354348	0.825921
PID_SHP2_PATHWAY	56	677	1523	0.173697	0.0639965	0.00439067	0.898364	0.826303
BIOCARTA_ARF_PATHWAY	17	676	1524	0.173131	0.581899	0.17747	0.907358	0.826869
REACTOME_RELAXIN_RECEPTORS	8	675	1525	0.172199	0.44252	0.437836	0.67658	0.827801
REACTOME_SIGNALING_BY_NOTCH2	32	674	1526	0.172138	0.727478	0.0878959	0.72452	0.827862
BIOCARTA_AHSP_PATHWAY	13	673	1527	0.172066	0.0403637	0.07753	0.478661	0.827934
REACTOME_TNFR1_MEDIATED_CERAMIDE_PRODUCTION	5	672	1528	0.172014	0.626777	0.303426	0.760832	0.827986
REACTOME_SENSING_OF_DNA_DOUBLE_STRAND_BREAKS	5	671	1529	0.171719	0.56974	0.215898	0.729572	0.828281
BIOCARTA_DSP_PATHWAY	9	670	1530	0.17126	0.56316	0.185785	0.745179	0.82874
REACTOME_PI3K_EVENTS_IN_ERBB4_SIGNALING	10	669	1531	0.171172	0.47003	0.187475	0.845755	0.828828
REACTOME_DEPOLYMERISATION_OF_THE_NUCLEAR_LAMINA	15	668	1532	0.17102	0.661275	0.175753	0.847862	0.82898
PID_P73PATHWAY	77	667	1533	0.170693	0.796009	0.0520145	0.885184	0.829307
REACTOME_TERMINAL_PATHWAY_OF_COMPLEMENT	8	666	1534	0.170272	0.4511	0.25435	0.698379	0.829728
KEGG_DRUG_METABOLISM_OTHER_ENZYMES	51	665	1535	0.169359	0.521327	0.179226	0.69502	0.830641
PID_RAC1_REG_PATHWAY	38	664	1536	0.168509	0.512927	0.053475	0.884776	0.831491
REACTOME_INTERLEUKIN_1_SIGNALING	101	663	1537	0.166965	0.652009	0.0931736	0.935147	0.833035
KEGG_VEGF_SIGNALING_PATHWAY	76	662	1538	0.166894	0.144807	0.0127119	0.890299	0.833106
KEGG_RIG_I_LIKE_RECEPTOR_SIGNALING_PATHWAY	69	661	1539	0.166499	0.485963	0.0544372	0.622624	0.833501
BIOCARTA_RECK_PATHWAY	9	660	1540	0.166473	0.59306	0.246226	0.910126	0.833527
PID_CASPASE_PATHWAY	50	659	1541	0.166472	0.849765	0.0616779	0.854692	0.833528
BIOCARTA_STRESS_PATHWAY	24	658	1542	0.166304	0.546531	0.180644	0.93961	0.833696
REACTOME_TRANSCRIPTIONAL_REGULATION_OF_WHITE_ADIPOCYTE_DIFFERENTIATION	84	657	1543	0.166091	0.10082	0.0126507	0.778837	0.833909
REACTOME_PYRIMIDINE_SALVAGE	10	656	1544	0.166058	0.612338	0.187198	0.423908	0.833942
REACTOME_ACYL_CHAIN_REMODELLING_OF_PS	21	655	1545	0.16564	0.206674	0.17882	0.918851	0.83436
KEGG_ERBB_SIGNALING_PATHWAY	86	654	1546	0.16562	0.390409	0.000121989	0.796735	0.83438
REACTOME_NOTCH2_ACTIVATION_AND_TRANSMISSION_OF_SIGNAL_TO_THE_NUCLEUS	21	653	1547	0.165576	0.714842	0.160269	0.795204	0.834424
REACTOME_PHASE_2_PLATEAU_PHASE	26	652	1548	0.165007	0.730375	0.186295	0.588406	0.834993
REACTOME_DIGESTION_OF_DIETARY_LIPID	7	651	1549	0.164703	0.305421	0.273707	0.426996	0.835297
BIOCARTA_ACH_PATHWAY	14	650	1550	0.163909	0.350069	0.0312126	0.786885	0.836091
BIOCARTA_TNFR1_PATHWAY	29	649	1551	0.163745	0.69615	0.159607	0.836085	0.836255
REACTOME_ACTIVATION_OF_IRF3_IRF7_MEDIATED_BY_TBK1_IKK_EPSILON	17	648	1552	0.163421	0.780893	0.223407	0.806246	0.836579
REACTOME_ASSEMBLY_AND_CELL_SURFACE_PRESENTATION_OF_NMDA_RECEPTORS	42	647	1553	0.163329	0.299753	0.0885757	0.887638	0.836671
REACTOME_REGULATED_PROTEOLYSIS_OF_P75NTR	11	646	1554	0.163159	0.614831	0.257039	0.899547	0.836841
KEGG_CHRONIC_MYELOID_LEUKEMIA	73	645	1555	0.162069	0.489909	0.00543808	0.768728	0.837931
REACTOME_E2F_MEDIATED_REGULATION_OF_DNA_REPLICATION	22	643	1556	0.16172	0.799059	0.200383	0.810899	0.83828
REACTOME_FACTORS_INVOLVED_IN_MEGAKARYOCYTE_DEVELOPMENT_AND_PLATELET_PRODUCTION	164	644	1557	0.16172	0.186426	0.0360016	0.934317	0.83828
REACTOME_NEGATIVE_REGULATION_OF_MET_ACTIVITY	21	642	1558	0.161135	0.453045	0.0747241	0.700404	0.838865
REACTOME_NONCANONICAL_ACTIVATION_OF_NOTCH3	8	641	1559	0.161026	0.564829	0.233115	0.873371	0.838974
PID_RHODOPSIN_PATHWAY	23	640	1560	0.158927	0.369746	0.301677	0.9176	0.841073
REACTOME_RNA_POLYMERASE_I_TRANSCRIPTION	108	639	1561	0.158422	0.676785	0.111165	0.890396	0.841578
KEGG_DNA_REPLICATION	36	638	1562	0.157844	0.90681	0.211044	0.802397	0.842156
REACTOME_MET_ACTIVATES_PI3K_AKT_SIGNALING	6	637	1563	0.157213	0.367164	0.139238	0.678677	0.842787
PID_BARD1_PATHWAY	28	636	1564	0.155794	0.882981	0.265381	0.933055	0.844206
REACTOME_REGULATION_OF_INNATE_IMMUNE_RESPONSES_TO_CYTOSOLIC_DNA	15	635	1565	0.155488	0.613398	0.152476	0.75803	0.844512
REACTOME_GENE_SILENCING_BY_RNA	134	634	1566	0.155426	0.717569	0.0563309	0.83687	0.844574
PID_PDGFRA_PATHWAY	22	633	1567	0.155221	0.200943	0.017613	0.175594	0.844779
PID_INTEGRIN_A4B1_PATHWAY	32	632	1568	0.154401	0.490782	0.0709713	0.842218	0.845599
REACTOME_RHO_GTPASES_ACTIVATE_CIT	19	631	1569	0.153972	0.899167	0.286032	0.810215	0.846028
REACTOME_WNT5A_DEPENDENT_INTERNALIZATION_OF_FZD4	15	630	1570	0.153753	0.452299	0.112043	0.514663	0.846247
REACTOME_METALLOTHIONEINS_BIND_METALS	11	629	1571	0.153674	0.696227	0.339638	0.967257	0.846326
REACTOME_SIGNALING_BY_NOTCH1	72	628	1572	0.153409	0.832631	0.0626978	0.938143	0.846591
PID_IL8_CXCR1_PATHWAY	26	627	1573	0.151897	0.0975235	0.00523346	0.00436341	0.848103
REACTOME_ACTIVATION_OF_THE_AP_1_FAMILY_OF_TRANSCRIPTION_FACTORS	10	626	1574	0.151391	0.621539	0.191273	0.797801	0.848609
KEGG_ETHER_LIPID_METABOLISM	30	625	1575	0.150914	0.0923116	0.0959016	0.797736	0.849086
REACTOME_TP53_REGULATES_TRANSCRIPTION_OF_GENES_INVOLVED_IN_G1_CELL_CYCLE_ARREST	14	624	1576	0.150037	0.462616	0.214094	0.904251	0.849963
PID_FGF_PATHWAY	55	623	1577	0.149102	0.87509	0.0371745	0.72528	0.850898
REACTOME_IRF3_MEDIATED_ACTIVATION_OF_TYPE_1_IFN	5	622	1578	0.148756	0.461458	0.235522	0.645015	0.851244
REACTOME_BASE_EXCISION_REPAIR	90	621	1579	0.148506	0.689011	0.0732028	0.849759	0.851494
REACTOME_EPIGENETIC_REGULATION_OF_GENE_EXPRESSION	146	620	1580	0.148175	0.858384	0.0768067	0.932705	0.851825
PID_INTEGRIN5_PATHWAY	16	619	1581	0.147824	0.380125	0.0374185	0.662507	0.852176
REACTOME_HDACS_DEACETYLATE_HISTONES	92	618	1582	0.147742	0.518229	0.0863328	0.834791	0.852258
REACTOME_ADHERENS_JUNCTIONS_INTERACTIONS	28	617	1583	0.147257	0.651948	0.0373091	0.304573	0.852743
REACTOME_SMOOTH_MUSCLE_CONTRACTION	36	616	1584	0.147093	0.697335	0.0968625	0.71004	0.852907
REACTOME_SUMO_IS_PROTEOLYTICALLY_PROCESSED	6	615	1585	0.146986	0.493917	0.20272	0.836742	0.853014
BIOCARTA_RANKL_PATHWAY	14	614	1586	0.146647	0.473252	0.15014	0.720694	0.853353
KEGG_TRYPTOPHAN_METABOLISM	40	613	1587	0.146528	0.124422	0.00164747	0.57991	0.853472
REACTOME_NEF_MEDIATED_CD4_DOWN_REGULATION	9	612	1588	0.146441	0.205006	0.0927929	0.67478	0.853559
REACTOME_PROCESSING_AND_ACTIVATION_OF_SUMO	10	611	1589	0.145851	0.562317	0.185028	0.857677	0.854149
BIOCARTA_MAPK_PATHWAY	81	610	1590	0.145077	0.620148	0.00423339	0.797169	0.854923
BIOCARTA_EPO_PATHWAY	19	609	1591	0.144608	0.465359	0.0658146	0.692872	0.855392
REACTOME_TRP_CHANNELS	28	608	1592	0.143135	0.717843	0.229927	0.959384	0.856865
REACTOME_RUNX3_REGULATES_P14_ARF	10	607	1593	0.142679	0.311601	0.104804	0.555176	0.857321
PID_HDAC_CLASSI_PATHWAY	66	606	1594	0.142534	0.385035	0.0333178	0.889238	0.857466
REACTOME_HEME_DEGRADATION	5	605	1595	0.142509	0.27514	0.126528	0.426003	0.857491
REACTOME_RAB_GERANYLGERANYLATION	63	604	1596	0.142392	0.445995	0.0186889	0.842852	0.857608
REACTOME_TRANSCRIPTIONAL_REGULATION_BY_RUNX3	94	603	1597	0.142302	0.523719	0.0745689	0.957628	0.857698
PID_KIT_PATHWAY	52	602	1598	0.141937	0.730933	0.0184347	0.785788	0.858063
PID_ANTHRAX_PATHWAY	18	601	1599	0.141749	0.584773	0.192433	0.906102	0.858251
REACTOME_MET_RECEPTOR_RECYCLING	10	600	1600	0.141497	0.408693	0.15643	0.617547	0.858503
REACTOME_SIGNALING_BY_NOTCH1_T_7_9_NOTCH1:M1580_K2555_TRANSLOCATION_MUTANT	7	599	1601	0.14072	0.676163	0.239856	0.61076	0.85928
REACTOME_HDL_REMODELING	10	598	1602	0.140719	0.0679811	0.0342712	0.291322	0.859281
REACTOME_FORMATION_OF_SENESCENCE_ASSOCIATED_HETEROCHROMATIN_FOCI_SAHF	17	597	1603	0.140386	0.322275	0.0695296	0.695351	0.859614
PID_ERBB_NETWORK_PATHWAY	15	596	1604	0.139947	0.152419	0.0933154	0.806367	0.860053
KEGG_O_GLYCAN_BIOSYNTHESIS	29	595	1605	0.139875	0.545999	0.117378	0.747289	0.860125
REACTOME_NICOTINATE_METABOLISM	28	594	1606	0.139538	0.66459	0.0795057	0.759891	0.860462
PID_PS1_PATHWAY	45	593	1607	0.139489	0.386268	0.0574573	0.913077	0.860511
REACTOME_SIGNALLING_TO_RAS	20	592	1608	0.138083	0.166296	0.0443848	0.783732	0.861917
REACTOME_N_GLYCAN_TRIMMING_AND_ELONGATION_IN_THE_CIS_GOLGI	5	591	1609	0.136368	0.269318	0.136409	0.708066	0.863632
REACTOME_BASIGIN_INTERACTIONS	25	590	1610	0.135645	0.236162	0.0399496	0.742013	0.864355
REACTOME_ACTIVATION_OF_NF_KAPPAB_IN_B_CELLS	66	589	1611	0.135421	0.49959	0.0341599	0.89931	0.864579
REACTOME_SIGNALING_BY_NTRK3_TRKC	17	588	1612	0.135094	0.20601	0.0426276	0.704991	0.864906
BIOCARTA_PPARA_PATHWAY	52	587	1613	0.135042	0.492164	0.0411539	0.910815	0.864958
REACTOME_NUCLEAR_RECEPTOR_TRANSCRIPTION_PATHWAY	53	586	1614	0.134087	0.099678	0.00563362	0.761278	0.865913
REACTOME_CARGO_RECOGNITION_FOR_CLATHRIN_MEDIATED_ENDOCYTOSIS	103	585	1615	0.134034	0.493255	0.0199195	0.883018	0.865966
REACTOME_SEMA4D_IN_SEMAPHORIN_SIGNALING	24	584	1616	0.133542	0.777677	0.231876	0.913236	0.866458
BIOCARTA_SRCRPTP_PATHWAY	11	583	1617	0.133378	0.0750186	0.0180026	0.363	0.866622
REACTOME_ERYTHROPOIETIN_ACTIVATES_PHOSPHOLIPASE_C_GAMMA_PLCG	7	582	1618	0.133102	0.156187	0.14979	0.84661	0.866898
REACTOME_OTHER_INTERLEUKIN_SIGNALING	287	581	1619	0.133046	0.639036	0.00431787	0.896409	0.866954
REACTOME_RAP1_SIGNALLING	16	580	1620	0.132245	0.648814	0.176161	0.809816	0.867755
BIOCARTA_BIOPEPTIDES_PATHWAY	29	579	1621	0.132226	0.778655	0.0437518	0.76975	0.867774
REACTOME_CATION_COUPLED_CHLORIDE_COTRANSPORTERS	7	578	1622	0.132148	0.104481	0.136619	0.918816	0.867852
REACTOME_CROSSLINKING_OF_COLLAGEN_FIBRILS	18	577	1623	0.131918	0.580312	0.0655261	0.426052	0.868082
REACTOME_SENESCENCE_ASSOCIATED_SECRETORY_PHENOTYPE_SASP	107	576	1624	0.131575	0.729164	0.0671929	0.885551	0.868425
REACTOME_RIP_MEDIATED_NFKB_ACTIVATION_VIA_ZBP1	17	575	1625	0.131573	0.647769	0.0693606	0.225934	0.868427
PID_IL6_7_PATHWAY	47	574	1626	0.131241	0.0399322	0.0181523	0.908776	0.868759
REACTOME_DOWNREGULATION_OF_ERBB4_SIGNALING	9	573	1627	0.131026	0.504541	0.177319	0.763602	0.868974
REACTOME_THE_NLRP3_INFLAMMASOME	15	572	1628	0.129884	0.567813	0.135229	0.867003	0.870116
REACTOME_DAP12_SIGNALING	29	571	1629	0.12945	0.290642	0.0510919	0.55945	0.87055
REACTOME_LISTERIA_MONOCYTOGENES_ENTRY_INTO_HOST_CELLS	20	570	1630	0.128975	0.552349	0.102777	0.760092	0.871025
REACTOME_ACYL_CHAIN_REMODELLING_OF_PI	16	569	1631	0.12891	0.0873186	0.164688	0.90229	0.87109
REACTOME_POSITIVE_EPIGENETIC_REGULATION_OF_RRNA_EXPRESSION	104	568	1632	0.128881	0.764605	0.132111	0.956477	0.871119
REACTOME_STING_MEDIATED_INDUCTION_OF_HOST_IMMUNE_RESPONSES	14	567	1633	0.128838	0.720771	0.129593	0.46503	0.871162
REACTOME_MITOTIC_PROPHASE	139	566	1634	0.128739	0.625247	0.103907	0.960659	0.871261
NABA_ECM_AFFILIATED	169	565	1635	0.128513	0.490026	0.00707201	0.654533	0.871487
REACTOME_ACYL_CHAIN_REMODELING_OF_CL	6	564	1636	0.12776	0.0778666	0.112175	0.853171	0.87224
BIOCARTA_41BB_PATHWAY	18	563	1637	0.127004	0.473754	0.0634863	0.652591	0.872996
REACTOME_BMAL1:CLOCK_NPAS2_ACTIVATES_CIRCADIAN_GENE_EXPRESSION	26	562	1638	0.126891	0.104747	0.061488	0.564133	0.873109
REACTOME_OTHER_SEMAPHORIN_INTERACTIONS	19	561	1639	0.12677	0.613935	0.0555948	0.766522	0.87323
PID_PRL_SIGNALING_EVENTS_PATHWAY	23	560	1640	0.1265	0.79042	0.297788	0.929458	0.8735
REACTOME_TP53_REGULATES_TRANSCRIPTION_OF_DEATH_RECEPTORS_AND_LIGANDS	12	559	1641	0.126439	0.443771	0.12352	0.660522	0.873561
BIOCARTA_BARD1_PATHWAY	8	558	1642	0.125953	0.44301	0.166127	0.855419	0.874047
REACTOME_OVARIAN_TUMOR_DOMAIN_PROTEASES	38	557	1643	0.12557	0.544841	0.0605614	0.646475	0.87443
REACTOME_DEFECTIVE_LFNG_CAUSES_SCDO3	5	556	1644	0.125543	0.495335	0.232456	0.768497	0.874457
REACTOME_RUNX3_REGULATES_YAP1_MEDIATED_TRANSCRIPTION	7	555	1645	0.124547	0.609579	0.255851	0.707712	0.875453
REACTOME_INTERACTION_WITH_CUMULUS_CELLS_AND_THE_ZONA_PELLUCIDA	11	554	1646	0.124334	0.74571	0.622584	0.226377	0.875666
REACTOME_SIGNALING_BY_CYTOSOLIC_FGFR1_FUSION_MUTANTS	18	553	1647	0.123673	0.863939	0.339819	0.94825	0.876327
REACTOME_DISORDERS_OF_TRANSMEMBRANE_TRANSPORTERS	175	552	1648	0.123668	0.232889	0.00509895	0.887066	0.876332
REACTOME_ERCC6_CSB_AND_EHMT2_G9A_POSITIVELY_REGULATE_RRNA_EXPRESSION	74	551	1649	0.123056	0.615563	0.110617	0.853606	0.876944
BIOCARTA_CHEMICAL_PATHWAY	18	550	1650	0.122882	0.397985	0.0428138	0.560965	0.877118
REACTOME_CLEC7A_INFLAMMASOME_PATHWAY	6	549	1651	0.122862	0.613728	0.313804	0.915773	0.877138
BIOCARTA_INSULIN_PATHWAY	21	548	1652	0.122375	0.43333	0.0657069	0.756995	0.877625
BIOCARTA_AMAN_PATHWAY	15	547	1653	0.122365	0.547462	0.215655	0.9137	0.877635
REACTOME_SYNTHESIS_OF_DOLICHYL_PHOSPHATE	6	546	1654	0.122209	0.298539	0.141517	0.742609	0.877791
BIOCARTA_FXR_PATHWAY	7	545	1655	0.122068	0.519896	0.234018	0.725378	0.877932
REACTOME_NEGATIVE_REGULATORS_OF_DDX58_IFIH1_SIGNALING	34	544	1656	0.122004	0.606183	0.101629	0.425444	0.877996
REACTOME_EPHA_MEDIATED_GROWTH_CONE_COLLAPSE	29	543	1657	0.121648	0.564129	0.0806473	0.753148	0.878352
BIOCARTA_STAT3_PATHWAY	8	542	1658	0.121574	0.582867	0.207634	0.889343	0.878426
REACTOME_DSCAM_INTERACTIONS	11	541	1659	0.121512	0.321819	0.0617432	0.505465	0.878488
REACTOME_TP53_REGULATES_TRANSCRIPTION_OF_CELL_CYCLE_GENES	47	540	1660	0.12017	0.845173	0.116435	0.932467	0.87983
BIOCARTA_IL10_PATHWAY	13	539	1661	0.120078	0.475914	0.0220214	0.129958	0.879922
REACTOME_ABACAVIR_TRANSMEMBRANE_TRANSPORT	5	538	1662	0.119671	0.528603	0.232851	0.897385	0.880329
REACTOME_TNF_SIGNALING	41	537	1663	0.119033	0.6758	0.121952	0.884727	0.880967
REACTOME_ANDROGEN_BIOSYNTHESIS	11	536	1664	0.118258	0.301044	0.21872	0.572708	0.881742
REACTOME_BASE_EXCISION_REPAIR_AP_SITE_FORMATION	62	535	1665	0.118208	0.377504	0.114408	0.872791	0.881792
PID_SYNDECAN_3_PATHWAY	16	534	1666	0.11756	0.695908	0.249204	0.893881	0.88244
REACTOME_RHO_GTPASES_ACTIVATE_PAKS	21	533	1667	0.117411	0.882618	0.224274	0.795104	0.882589
REACTOME_ANTIVIRAL_MECHANISM_BY_IFN_STIMULATED_GENES	80	532	1668	0.117331	0.660333	0.038852	0.918431	0.882669
REACTOME_P2Y_RECEPTORS	12	531	1669	0.116446	0.462032	0.183864	0.685077	0.883554
BIOCARTA_RELA_PATHWAY	15	530	1670	0.114886	0.478068	0.107265	0.867826	0.885114
REACTOME_SPHINGOLIPID_DE_NOVO_BIOSYNTHESIS	41	529	1671	0.114537	0.306809	0.020181	0.640019	0.885463
REACTOME_MICROAUTOPHAGY	28	528	1672	0.1145	0.36628	0.137629	0.972573	0.8855
REACTOME_ACTIVATION_OF_THE_PHOTOTRANSDUCTION_CASCADE	11	527	1673	0.113534	0.161072	0.250478	0.821287	0.886466
REACTOME_PI3K_AKT_SIGNALING_IN_CANCER	102	526	1674	0.113192	0.20931	0.00335639	0.905988	0.886808
REACTOME_LEADING_STRAND_SYNTHESIS	14	525	1675	0.113042	0.805497	0.22946	0.690503	0.886958
BIOCARTA_IL6_PATHWAY	21	524	1676	0.112471	0.402528	0.0349131	0.341619	0.887529
REACTOME_TP53_REGULATES_TRANSCRIPTION_OF_GENES_INVOLVED_IN_G2_CELL_CYCLE_ARREST	18	523	1677	0.112392	0.665223	0.145742	0.888372	0.887608
REACTOME_MITOCHONDRIAL_UNCOUPLING_PROTEINS	5	522	1678	0.112108	0.401489	0.180582	0.655418	0.887892
BIOCARTA_DEATH_PATHWAY	29	521	1679	0.111712	0.762116	0.0511302	0.828812	0.888288
REACTOME_RHO_GTPASES_ACTIVATE_ROCKS	19	520	1680	0.111708	0.857242	0.266789	0.751878	0.888292
REACTOME_G_ALPHA_I_SIGNALLING_EVENTS	397	519	1681	0.110735	0.265122	0.00142995	0.19615	0.889265
BIOCARTA_ERYTH_PATHWAY	15	517	1682	0.110514	0.118126	0.0230652	0.00299708	0.889486
PID_HNF3A_PATHWAY	43	518	1683	0.110514	0.456793	0.026139	0.69454	0.889486
SIG_PIP3_SIGNALING_IN_B_LYMPHOCYTES	36	516	1684	0.110476	0.198309	0.00635543	0.763849	0.889524
REACTOME_RUNX2_REGULATES_BONE_DEVELOPMENT	30	515	1685	0.110379	0.238101	0.0902676	0.63846	0.889621
REACTOME_PROTEIN_UBIQUITINATION	77	514	1686	0.108199	0.870353	0.133357	0.963127	0.891801
KEGG_ABC_TRANSPORTERS	44	513	1687	0.107857	0.114145	0.000147439	0.31549	0.892143
REACTOME_DETOXIFICATION_OF_REACTIVE_OXYGEN_SPECIES	36	512	1688	0.107799	0.375112	0.0805161	0.748858	0.892201
REACTOME_INTERLEUKIN_6_SIGNALING	11	511	1689	0.10777	0.290733	0.0613963	0.485373	0.89223
REACTOME_REGULATION_OF_TLR_BY_ENDOGENOUS_LIGAND	19	510	1690	0.107633	0.334623	0.00688688	0.0237949	0.892367
BIOCARTA_FREE_PATHWAY	9	509	1691	0.107508	0.689519	0.243609	0.949376	0.892492
REACTOME_ACTIVATED_NTRK3_SIGNALS_THROUGH_PI3K	6	508	1692	0.107289	0.204727	0.103286	0.598382	0.892711
REACTOME_RHO_GTPASE_EFFECTORS	315	507	1693	0.106886	0.718907	0.0289342	0.900004	0.893114
REACTOME_MET_ACTIVATES_RAP1_AND_RAC1	11	506	1694	0.106478	0.3075	0.155047	0.712961	0.893522
PID_ARF6_TRAFFICKING_PATHWAY	49	504	1695	0.106378	0.69139	0.0470968	0.895597	0.893622
REACTOME_ACTIVATED_NOTCH1_TRANSMITS_SIGNAL_TO_THE_NUCLEUS	30	505	1696	0.106378	0.791973	0.0887256	0.923529	0.893622
REACTOME_RNA_POLYMERASE_I_PROMOTER_ESCAPE	89	503	1697	0.105465	0.563519	0.0607953	0.839849	0.894535
REACTOME_ERYTHROPOIETIN_ACTIVATES_RAS	14	502	1698	0.105458	0.186419	0.202068	0.924357	0.894542
BIOCARTA_CBL_PATHWAY	12	501	1699	0.103406	0.229439	0.040794	0.503271	0.896594
PID_TNF_PATHWAY	45	500	1700	0.102979	0.463873	0.034997	0.872752	0.897021
KEGG_GLYCEROLIPID_METABOLISM	43	499	1701	0.102656	0.416471	0.0170127	0.594873	0.897344
REACTOME_DOWNSTREAM_SIGNAL_TRANSDUCTION	29	498	1702	0.102377	0.531378	0.0873979	0.883357	0.897623
REACTOME_CD28_CO_STIMULATION	33	497	1703	0.102164	0.348039	0.0389581	0.475004	0.897836
REACTOME_NOTCH4_INTRACELLULAR_DOMAIN_REGULATES_TRANSCRIPTION	20	496	1704	0.100487	0.503881	0.11292	0.836682	0.899513
BIOCARTA_ALK_PATHWAY	37	495	1705	0.0999181	0.536487	0.0200808	0.51739	0.900082
REACTOME_SIGNALING_BY_BMP	28	494	1706	0.0997715	0.554649	0.155323	0.871423	0.900228
REACTOME_ZINC_INFLUX_INTO_CELLS_BY_THE_SLC39_GENE_FAMILY	10	493	1707	0.0997312	0.686889	0.296686	0.847047	0.900269
REACTOME_TRAIL_SIGNALING	8	492	1708	0.0992978	0.41182	0.102592	0.650665	0.900702
REACTOME_SIGNALING_BY_RECEPTOR_TYROSINE_KINASES	465	491	1709	0.0977918	0.396006	0.00824663	0.972413	0.902208
REACTOME_NICOTINAMIDE_SALVAGING	16	490	1710	0.0971668	0.735406	0.159885	0.545323	0.902833
BIOCARTA_IGF1_PATHWAY	21	489	1711	0.0971405	0.338446	0.0503526	0.79841	0.90286
BIOCARTA_CYTOKINE_PATHWAY	18	488	1712	0.0971005	0.0748068	0.0848896	0.0595984	0.9029
REACTOME_P130CAS_LINKAGE_TO_MAPK_SIGNALING_FOR_INTEGRINS	15	487	1713	0.0967704	0.0508316	0.0085145	0.100287	0.90323
BIOCARTA_D4GDI_PATHWAY	12	486	1714	0.0967293	0.249502	0.0547928	0.430188	0.903271
BIOCARTA_ARENRF2_PATHWAY	20	485	1715	0.0959677	0.124138	0.0129593	0.32223	0.904032
REACTOME_SYNTHESIS_OF_15_EICOSATETRAENOIC_ACID_DERIVATIVES	6	484	1716	0.0958787	0.323906	0.107346	0.392588	0.904121
REACTOME_APOPTOTIC_CLEAVAGE_OF_CELL_ADHESION_PROTEINS	11	483	1717	0.0957615	0.133547	0.111299	0.776176	0.904238
REACTOME_TGF_BETA_RECEPTOR_SIGNALING_IN_EMT_EPITHELIAL_TO_MESENCHYMAL_TRANSITION	16	482	1718	0.0955715	0.389009	0.170867	0.848012	0.904429
BIOCARTA_SODD_PATHWAY	10	481	1719	0.0954861	0.276062	0.0754154	0.834172	0.904514
REACTOME_DEATH_RECEPTOR_SIGNALLING	138	480	1720	0.0954781	0.666603	0.0653058	0.9738	0.904522
PID_ALPHA_SYNUCLEIN_PATHWAY	31	479	1721	0.0953448	0.123632	0.0165302	0.485317	0.904655
BIOCARTA_PEPI_PATHWAY	7	478	1722	0.094868	0.25069	0.237971	0.75444	0.905132
REACTOME_METAL_ION_SLC_TRANSPORTERS	26	477	1723	0.0943186	0.506451	0.0420823	0.189765	0.905681
REACTOME_ACYL_CHAIN_REMODELLING_OF_PE	24	476	1724	0.0942634	0.199335	0.133496	0.902367	0.905737
BIOCARTA_MRP_PATHWAY	6	475	1725	0.0942171	0.523817	0.2626	0.930181	0.905783
REACTOME_DDX58_IFIH1_MEDIATED_INDUCTION_OF_INTERFERON_ALPHA_BETA	77	474	1726	0.0937935	0.849453	0.0753147	0.703899	0.906206
REACTOME_GAP_JUNCTION_TRAFFICKING_AND_REGULATION	50	473	1727	0.0934548	0.324655	0.03362	0.31367	0.906545
REACTOME_SYNTHESIS_OF_ACTIVE_UBIQUITIN:_ROLES_OF_E1_AND_E2_ENZYMES	29	472	1728	0.0930595	0.513755	0.132891	0.92224	0.90694
REACTOME_DOWNSTREAM_SIGNALING_EVENTS_OF_B_CELL_RECEPTOR_BCR	80	471	1729	0.0928802	0.32511	0.0228022	0.94513	0.90712
BIOCARTA_ATM_PATHWAY	19	470	1730	0.0924531	0.698594	0.185348	0.88404	0.907547
REACTOME_IL_6_TYPE_CYTOKINE_RECEPTOR_LIGAND_INTERACTIONS	17	469	1731	0.0924481	0.355303	0.0873312	0.676379	0.907552
PID_TCPTP_PATHWAY	42	468	1732	0.0922224	0.521589	0.0364904	0.856997	0.907778
REACTOME_SIGNALING_BY_TGF_BETA_RECEPTOR_COMPLEX_IN_CANCER	8	467	1733	0.0910067	0.331755	0.125764	0.893291	0.908993
REACTOME_DEX_H_BOX_HELICASES_ACTIVATE_TYPE_I_IFN_AND_INFLAMMATORY_CYTOKINES_PRODUCTION	7	466	1734	0.0897773	0.620727	0.22521	0.898055	0.910223
REACTOME_NUCLEOSOME_ASSEMBLY	69	465	1735	0.0894087	0.411564	0.111942	0.927444	0.910591
SIG_CD40PATHWAYMAP	34	464	1736	0.0884792	0.476929	0.09111	0.96183	0.911521
BIOCARTA_IL3_PATHWAY	15	463	1737	0.088297	0.590005	0.192168	0.530834	0.911703
REACTOME_FASL_CD95L_SIGNALING	5	462	1738	0.0869042	0.359917	0.0877412	0.292489	0.913096
REACTOME_FIBRONECTIN_MATRIX_FORMATION	6	461	1739	0.0867275	0.114643	0.0602621	0.435251	0.913272
REACTOME_SIGNALING_BY_NOTCH3	48	460	1740	0.0866136	0.603181	0.0338715	0.871518	0.913386
PID_TXA2PATHWAY	54	459	1741	0.0865407	0.343896	0.0081487	0.608455	0.913459
REACTOME_LYSOSOME_VESICLE_BIOGENESIS	35	458	1742	0.0861104	0.544554	0.104104	0.90851	0.91389
REACTOME_GRB2:SOS_PROVIDES_LINKAGE_TO_MAPK_SIGNALING_FOR_INTEGRINS	15	457	1743	0.0859873	0.0328393	0.00491161	0.0627503	0.914013
REACTOME_FORMATION_OF_THE_BETA_CATENIN:TCF_TRANSACTIVATING_COMPLEX	90	456	1744	0.0858145	0.708168	0.0926288	0.93445	0.914185
PID_ERBB4_PATHWAY	38	455	1745	0.085753	0.692196	0.0662268	0.840226	0.914247
KEGG_GLYCOSPHINGOLIPID_BIOSYNTHESIS_GLOBO_SERIES	14	454	1746	0.0852286	0.298109	0.0701872	0.210298	0.914771
SIG_BCR_SIGNALING_PATHWAY	46	453	1747	0.0849427	0.117376	0.00682225	0.795923	0.915057
REACTOME_POST_TRANSLATIONAL_MODIFICATION:_SYNTHESIS_OF_GPI_ANCHORED_PROTEINS	90	452	1748	0.0848478	0.478251	0.00295684	0.238639	0.915152
REACTOME_ESR_MEDIATED_SIGNALING	218	451	1749	0.084553	0.473868	0.0263776	0.900799	0.915447
KEGG_PATHOGENIC_ESCHERICHIA_COLI_INFECTION	56	450	1750	0.0843855	0.863222	0.0304763	0.817638	0.915614
REACTOME_RUNX1_REGULATES_ESTROGEN_RECEPTOR_MEDIATED_TRANSCRIPTION	6	449	1751	0.0843833	0.0916286	0.034155	0.612409	0.915617
REACTOME_MEIOSIS	115	448	1752	0.0838302	0.649473	0.029077	0.824215	0.91617
REACTOME_RESPONSE_TO_ELEVATED_PLATELET_CYTOSOLIC_CA2PLUS	129	447	1753	0.0832078	0.0241994	0.00654362	0.624843	0.916792
REACTOME_ALPHA_DEFENSINS	9	446	1754	0.0831411	0.337741	0.382003	0.674428	0.916859
BIOCARTA_TALL1_PATHWAY	15	445	1755	0.0830937	0.503075	0.190567	0.864321	0.916906
REACTOME_INFLAMMASOMES	20	444	1756	0.0826315	0.307141	0.0610305	0.923908	0.917369
REACTOME_SYNTHESIS_OF_LEUKOTRIENES_LT_AND_EOXINS_EX	21	443	1757	0.0825505	0.127308	0.0861289	0.862448	0.917449
REACTOME_GENE_AND_PROTEIN_EXPRESSION_BY_JAK_STAT_SIGNALING_AFTER_INTERLEUKIN_12_STIMULATION	38	442	1758	0.0823833	0.638881	0.126477	0.852001	0.917617
REACTOME_NEGATIVE_EPIGENETIC_REGULATION_OF_RRNA_EXPRESSION	107	441	1759	0.08217	0.680441	0.0961551	0.866386	0.91783
PID_AR_TF_PATHWAY	52	440	1760	0.0820655	0.21923	0.022326	0.940644	0.917934
REACTOME_CLEC7A_DECTIN_1_SIGNALING	99	439	1761	0.0820189	0.388953	0.057014	0.915672	0.917981
REACTOME_DIGESTION_AND_ABSORPTION	28	438	1762	0.0808275	0.209445	0.308075	0.268417	0.919173
BIOCARTA_AKT_PATHWAY	22	437	1763	0.0805079	0.178782	0.0486327	0.900043	0.919492
REACTOME_PREGNENOLONE_BIOSYNTHESIS	10	436	1764	0.0803706	0.613199	0.15974	0.226359	0.919629
BIOCARTA_PDGF_PATHWAY	28	435	1765	0.0803006	0.254603	0.0118922	0.855282	0.919699
BIOCARTA_ACE2_PATHWAY	13	434	1766	0.0794656	0.291245	0.110505	0.53013	0.920534
REACTOME_GLYCEROPHOSPHOLIPID_CATABOLISM	7	433	1767	0.0785189	0.331137	0.133183	0.739435	0.921481
REACTOME_LOSS_OF_FUNCTION_OF_TGFBR1_IN_CANCER	7	432	1768	0.0784012	0.336877	0.10149	0.837188	0.921599
KEGG_REGULATION_OF_ACTIN_CYTOSKELETON	212	431	1769	0.0783417	0.661523	0.0010162	0.972589	0.921658
REACTOME_CONDENSATION_OF_PROPHASE_CHROMOSOMES	71	430	1770	0.0781517	0.483613	0.136757	0.924862	0.921848
REACTOME_ZBP1_DAI_MEDIATED_INDUCTION_OF_TYPE_I_IFNS	21	429	1771	0.0778103	0.621289	0.0591782	0.299344	0.92219
REACTOME_TOLL_LIKE_RECEPTOR_4_TLR4_CASCADE	127	428	1772	0.0777845	0.502	0.0271396	0.683839	0.922216
REACTOME_SIGNALING_BY_ERYTHROPOIETIN	25	427	1773	0.0774002	0.282245	0.145975	0.890117	0.9226
BIOCARTA_PLCD_PATHWAY	5	426	1774	0.0768627	0.0467132	0.0326697	0.3175	0.923137
REACTOME_PECAM1_INTERACTIONS	11	425	1775	0.076645	0.159549	0.0725312	0.775404	0.923355
REACTOME_PHOSPHATE_BOND_HYDROLYSIS_BY_NUDT_PROTEINS	7	424	1776	0.0760707	0.403203	0.0834686	0.102696	0.923929
REACTOME_SEMAPHORIN_INTERACTIONS	64	423	1777	0.0757997	0.82786	0.0389407	0.848085	0.9242
REACTOME_ACYL_CHAIN_REMODELLING_OF_PG	18	422	1778	0.0750132	0.108308	0.140161	0.920121	0.924987
REACTOME_MRNA_EDITING	10	421	1779	0.0749502	0.377436	0.144565	0.631488	0.92505
REACTOME_SEMA4D_INDUCED_CELL_MIGRATION_AND_GROWTH_CONE_COLLAPSE	20	420	1780	0.0749262	0.722561	0.196382	0.897976	0.925074
REACTOME_TRANSPORT_OF_SMALL_MOLECULES	721	419	1781	0.074576	0.487337	0.00408882	0.876736	0.925424
BIOCARTA_FOSB_PATHWAY	5	418	1782	0.0744305	0.18079	0.099513	0.927333	0.925569
KEGG_ARACHIDONIC_ACID_METABOLISM	58	417	1783	0.0741894	0.0887408	0.0207062	0.231432	0.925811
SA_B_CELL_RECEPTOR_COMPLEXES	24	416	1784	0.0739241	0.175601	0.0201671	0.76324	0.926076
REACTOME_INTERLEUKIN_7_SIGNALING	34	415	1785	0.0737978	0.528557	0.0770992	0.557772	0.926202
REACTOME_INTERLEUKIN_1_FAMILY_SIGNALING	137	414	1786	0.0737434	0.455857	0.0528992	0.940451	0.926257
REACTOME_NEGATIVE_REGULATION_OF_TCF_DEPENDENT_SIGNALING_BY_WNT_LIGAND_ANTAGONISTS	15	413	1787	0.0736917	0.176091	0.142621	0.896932	0.926308
PID_EPO_PATHWAY	33	412	1788	0.0733823	0.181415	0.0187208	0.849308	0.926618
PID_HIF1_TFPATHWAY	66	411	1789	0.0733318	0.233973	0.013373	0.952601	0.926668
REACTOME_LYSOSPHINGOLIPID_AND_LPA_RECEPTORS	9	410	1790	0.0732778	0.382357	0.172355	0.491527	0.926722
REACTOME_IKK_COMPLEX_RECRUITMENT_MEDIATED_BY_RIP1	23	409	1791	0.0731334	0.628581	0.0573078	0.68197	0.926867
REACTOME_TNFR1_INDUCED_NFKAPPAB_SIGNALING_PATHWAY	29	408	1792	0.072868	0.47542	0.0983252	0.910717	0.927132
REACTOME_MEIOTIC_RECOMBINATION	84	407	1793	0.0728139	0.496088	0.0493013	0.823614	0.927186
REACTOME_NEF_MEDIATED_DOWNREGULATION_OF_MHC_CLASS_I_COMPLEX_CELL_SURFACE_EXPRESSION	10	406	1794	0.0727562	0.709617	0.202848	0.922081	0.927244
PID_RHOA_PATHWAY	43	405	1795	0.072474	0.748645	0.108375	0.872742	0.927526
REACTOME_PURINE_CATABOLISM	18	404	1796	0.0716613	0.721462	0.165079	0.548264	0.928339
REACTOME_REGULATION_OF_KIT_SIGNALING	16	403	1797	0.0713332	0.572235	0.0207476	0.229292	0.928667
REACTOME_SCAVENGING_BY_CLASS_A_RECEPTORS	19	402	1798	0.07096	0.418511	0.0257194	0.510363	0.92904
REACTOME_TRISTETRAPROLIN_TTP_ZFP36_BINDS_AND_DESTABILIZES_MRNA	17	401	1799	0.0709299	0.570374	0.0916325	0.837568	0.92907
REACTOME_OAS_ANTIVIRAL_RESPONSE	8	400	1800	0.0700538	0.468246	0.199436	0.60789	0.929946
REACTOME_VITAMIN_D_CALCIFEROL_METABOLISM	11	399	1801	0.0694243	0.0574877	0.0525356	0.720235	0.930576
REACTOME_INTERLEUKIN_20_FAMILY_SIGNALING	26	398	1802	0.0686539	0.413771	0.0942377	0.658401	0.931346
REACTOME_REPRODUCTION	141	397	1803	0.0685712	0.648424	0.0481181	0.816759	0.931429
REACTOME_RUNX2_REGULATES_OSTEOBLAST_DIFFERENTIATION	23	396	1804	0.067818	0.190476	0.140249	0.764018	0.932182
BIOCARTA_GHRELIN_PATHWAY	13	395	1805	0.0676474	0.525441	0.232136	0.927279	0.932353
REACTOME_PRE_NOTCH_EXPRESSION_AND_PROCESSING	118	394	1806	0.0674668	0.381303	0.0616068	0.914531	0.932533
REACTOME_NUCLEAR_SIGNALING_BY_ERBB4	32	393	1807	0.0672628	0.427576	0.0757664	0.960012	0.932737
REACTOME_COPI_INDEPENDENT_GOLGI_TO_ER_RETROGRADE_TRAFFIC	52	392	1808	0.067201	0.695737	0.121629	0.766394	0.932799
BIOCARTA_EPHA4_PATHWAY	8	391	1809	0.0669663	0.530857	0.124804	0.982291	0.933034
PID_CMYB_PATHWAY	84	390	1810	0.0668804	0.781747	0.0127084	0.674359	0.93312
REACTOME_REGULATION_OF_TNFR1_SIGNALING	31	389	1811	0.0666754	0.530761	0.0986801	0.902016	0.933325
REACTOME_ARACHIDONIC_ACID_METABOLISM	58	388	1812	0.0663244	0.0722713	0.00397933	0.331334	0.933676
REACTOME_IKBA_VARIANT_LEADS_TO_EDA_ID	7	387	1813	0.0659623	0.510608	0.20421	0.919613	0.934038
SA_CASPASE_CASCADE	19	386	1814	0.065469	0.168251	0.0135079	0.762551	0.934531
REACTOME_RUNX1_REGULATES_TRANSCRIPTION_OF_GENES_INVOLVED_IN_DIFFERENTIATION_OF_MYELOID_CELLS	7	385	1815	0.0650895	0.216271	0.108123	0.621935	0.93491
REACTOME_RUNX1_REGULATES_EXPRESSION_OF_COMPONENTS_OF_TIGHT_JUNCTIONS	5	384	1816	0.0650724	0.10808	0.0644633	0.568964	0.934928
KEGG_MATURITY_ONSET_DIABETES_OF_THE_YOUNG	25	383	1817	0.0647586	0.121455	0.205363	0.904943	0.935241
PID_NECTIN_PATHWAY	26	382	1818	0.0644041	0.465905	0.086829	0.827247	0.935596
REACTOME_ROS_AND_RNS_PRODUCTION_IN_PHAGOCYTES	36	381	1819	0.0640521	0.468629	0.028187	0.487278	0.935948
BIOCARTA_BCR_PATHWAY	33	380	1820	0.063933	0.093621	0.00333437	0.701229	0.936067
REACTOME_TRANSPORT_OF_BILE_SALTS_AND_ORGANIC_ACIDS_METAL_IONS_AND_AMINE_COMPOUNDS	86	379	1821	0.0636045	0.335118	0.00427113	0.176143	0.936395
REACTOME_NOD1_2_SIGNALING_PATHWAY	35	378	1822	0.0616038	0.172076	0.0500028	0.764029	0.938396
REACTOME_TRAFFICKING_AND_PROCESSING_OF_ENDOSOMAL_TLR	13	377	1823	0.0613038	0.0521175	0.00492953	0.00747478	0.938696
REACTOME_PYRIMIDINE_CATABOLISM	12	376	1824	0.0602161	0.512511	0.161915	0.702729	0.939784
REACTOME_SIRT1_NEGATIVELY_REGULATES_RRNA_EXPRESSION	66	375	1825	0.0600999	0.351273	0.0895491	0.921534	0.9399
REACTOME_RUNX3_REGULATES_CDKN1A_TRANSCRIPTION	7	374	1826	0.0594887	0.445395	0.106089	0.88396	0.940511
REACTOME_INTERLEUKIN_35_SIGNALLING	12	373	1827	0.0594587	0.422843	0.143567	0.833357	0.940541
REACTOME_CHROMOSOME_MAINTENANCE	104	372	1828	0.0592464	0.805579	0.0929392	0.950064	0.940754
BIOCARTA_RAC1_PATHWAY	21	371	1829	0.0591911	0.357518	0.0956925	0.892054	0.940809
REACTOME_MET_RECEPTOR_ACTIVATION	6	370	1830	0.0590087	0.214395	0.043409	0.126233	0.940991
REACTOME_NEURODEGENERATIVE_DISEASES	22	369	1831	0.058599	0.36432	0.0550201	0.791929	0.941401
REACTOME_ORGANIC_CATION_ANION_ZWITTERION_TRANSPORT	15	368	1832	0.0582955	0.230257	0.0628171	0.198523	0.941705
REACTOME_DIGESTION	23	367	1833	0.0575776	0.111341	0.261912	0.252333	0.942422
REACTOME_INTERLEUKIN_6_FAMILY_SIGNALING	24	366	1834	0.0573195	0.362033	0.0233671	0.473312	0.942681
REACTOME_DNA_METHYLATION	63	365	1835	0.0572502	0.551036	0.140449	0.909528	0.94275
REACTOME_TIGHT_JUNCTION_INTERACTIONS	29	364	1836	0.0572125	0.17316	0.0442631	0.433974	0.942787
REACTOME_INTEGRIN_SIGNALING	27	363	1837	0.0570183	0.0336286	0.009842	0.0839805	0.942982
REACTOME_MRNA_EDITING:_C_TO_U_CONVERSION	8	362	1838	0.0568478	0.284856	0.133264	0.391451	0.943152
REACTOME_ACYL_CHAIN_REMODELING_OF_DAG_AND_TAG	7	361	1839	0.0566491	0.327545	0.147545	0.837895	0.943351
REACTOME_SUMOYLATION_OF_INTRACELLULAR_RECEPTORS	30	360	1840	0.0557664	0.0883669	0.0254038	0.880911	0.944234
REACTOME_PRC2_METHYLATES_HISTONES_AND_DNA	71	359	1841	0.0555448	0.457093	0.0933146	0.925349	0.944455
PID_RAC1_PATHWAY	54	358	1842	0.0553337	0.531235	0.0542755	0.947814	0.944666
REACTOME_APOPTOTIC_EXECUTION_PHASE	51	357	1843	0.054603	0.693452	0.0576888	0.905982	0.945397
REACTOME_ERYTHROPOIETIN_ACTIVATES_STAT5	7	356	1844	0.0545807	0.250172	0.164794	0.896379	0.945419
KEGG_RENIN_ANGIOTENSIN_SYSTEM	17	355	1845	0.0540375	0.341933	0.134019	0.659664	0.945963
REACTOME_GLUTATHIONE_SYNTHESIS_AND_RECYCLING	12	354	1846	0.0540362	0.360026	0.139566	0.550896	0.945964
REACTOME_SYNTHESIS_OF_LIPOXINS_LX	6	353	1847	0.0539287	0.056223	0.0332336	0.38766	0.946071
PID_RAS_PATHWAY	30	352	1848	0.0538086	0.251712	0.0151309	0.678854	0.946191
BIOCARTA_PML_PATHWAY	17	351	1849	0.0529685	0.159179	0.0062959	0.557891	0.947031
BIOCARTA_CTCF_PATHWAY	24	350	1850	0.052935	0.214485	0.00787785	0.765208	0.947065
REACTOME_SIGNALING_BY_SCF_KIT	43	349	1851	0.0526667	0.798424	0.0262165	0.846367	0.947333
REACTOME_NCAM_SIGNALING_FOR_NEURITE_OUT_GROWTH	63	348	1852	0.0525671	0.735365	0.0143711	0.293585	0.947433
BIOCARTA_CASPASE_PATHWAY	22	347	1853	0.0524555	0.404148	0.0598568	0.865803	0.947544
REACTOME_MEIOTIC_SYNAPSIS	78	346	1854	0.0523605	0.567574	0.0640374	0.910414	0.947639
BIOCARTA_MSP_PATHWAY	6	345	1855	0.0522912	0.127169	0.114793	0.913611	0.947709
BIOCARTA_IL4_PATHWAY	11	344	1856	0.052273	0.21104	0.114251	0.339747	0.947727
BIOCARTA_NUCLEARRS_PATHWAY	34	343	1857	0.0516304	0.0228528	0.000258731	0.00185863	0.94837
PID_IL5_PATHWAY	14	342	1858	0.0513834	0.386704	0.173343	0.851395	0.948617
BIOCARTA_LAIR_PATHWAY	16	341	1859	0.0513804	0.199782	0.00170337	0.651701	0.94862
REACTOME_SIGNALING_BY_LEPTIN	11	340	1860	0.0512858	0.401984	0.0903875	0.736985	0.948714
REACTOME_REGULATION_OF_COMMISSURAL_AXON_PATHFINDING_BY_SLIT_AND_ROBO	10	339	1861	0.0512158	0.464363	0.160349	0.951623	0.948784
REACTOME_NEGATIVE_REGULATION_OF_THE_PI3K_AKT_NETWORK	110	338	1862	0.0509763	0.290826	0.0065981	0.955534	0.949024
REACTOME_FICOLINS_BIND_TO_REPETITIVE_CARBOHYDRATE_STRUCTURES_ON_THE_TARGET_CELL_SURFACE	5	337	1863	0.0506123	0.10564	0.196922	0.746803	0.949388
PID_NFKAPPAB_CANONICAL_PATHWAY	23	336	1864	0.0504829	0.329463	0.0417286	0.8681	0.949517
PID_AVB3_OPN_PATHWAY	31	335	1865	0.0502757	0.274735	0.036461	0.919427	0.949724
BIOCARTA_SET_PATHWAY	10	334	1866	0.0501332	0.505056	0.139769	0.926622	0.949867
BIOCARTA_PLATELETAPP_PATHWAY	14	333	1867	0.0500376	0.116968	0.00644424	0.405887	0.949962
PID_IL1_PATHWAY	34	332	1868	0.0499386	0.246514	0.0569537	0.91913	0.950061
BIOCARTA_FAS_PATHWAY	30	331	1869	0.0494732	0.380544	0.0299283	0.754508	0.950527
REACTOME_HYALURONAN_BIOSYNTHESIS_AND_EXPORT	4	330	1870	0.0492082	0.199984	0.199167	0.785536	0.950792
KEGG_NOTCH_SIGNALING_PATHWAY	47	329	1871	0.0490145	0.70849	0.0677714	0.918021	0.950985
REACTOME_ACTIVATION_OF_RAS_IN_B_CELLS	5	328	1872	0.0485772	0.0882821	0.0612279	0.788456	0.951423
KEGG_NEUROACTIVE_LIGAND_RECEPTOR_INTERACTION	271	327	1873	0.0482767	0.359072	0.000148705	0.688462	0.951723
REACTOME_NEF_MEDIATES_DOWN_MODULATION_OF_CELL_SURFACE_RECEPTORS_BY_RECRUITING_THEM_TO_CLATHRIN_ADAPTERS	21	326	1874	0.0481169	0.550018	0.0780859	0.786177	0.951883
REACTOME_ELASTIC_FIBRE_FORMATION	45	325	1875	0.0479372	0.31617	0.00276059	0.523565	0.952063
REACTOME_SIGNALING_BY_MET	79	324	1876	0.0477011	0.152576	0.0131834	0.894295	0.952299
PID_A6B1_A6B4_INTEGRIN_PATHWAY	46	323	1877	0.0472656	0.550417	0.0144111	0.845079	0.952734
REACTOME_CROSS_PRESENTATION_OF_PARTICULATE_EXOGENOUS_ANTIGENS_PHAGOSOMES	8	322	1878	0.0466822	0.0764936	0.0624846	0.465523	0.953318
REACTOME_IRON_UPTAKE_AND_TRANSPORT	58	321	1879	0.0465268	0.620399	0.0272466	0.557896	0.953473
REACTOME_METABOLISM_OF_ANGIOTENSINOGEN_TO_ANGIOTENSINS	17	320	1880	0.0464321	0.132531	0.079054	0.800491	0.953568
KEGG_ALDOSTERONE_REGULATED_SODIUM_REABSORPTION	42	319	1881	0.0463906	0.315336	0.0012159	0.560767	0.953609
REACTOME_TRYPTOPHAN_CATABOLISM	12	318	1882	0.0453883	0.030747	0.0522914	0.749001	0.954612
REACTOME_ORGANIC_CATION_TRANSPORT	10	317	1883	0.0452425	0.174377	0.0410725	0.281096	0.954758
KEGG_ALPHA_LINOLENIC_ACID_METABOLISM	19	316	1884	0.0452112	0.107167	0.157057	0.937943	0.954789
REACTOME_INTERLEUKIN_12_SIGNALING	47	315	1885	0.0449945	0.555987	0.122178	0.899408	0.955006
REACTOME_RUNX1_REGULATES_TRANSCRIPTION_OF_GENES_INVOLVED_IN_DIFFERENTIATION_OF_KERATINOCYTES	8	314	1886	0.0447439	0.106359	0.0337681	0.283809	0.955256
REACTOME_MECP2_REGULATES_TRANSCRIPTION_FACTORS	5	313	1887	0.0445936	0.505884	0.141174	0.476726	0.955406
BIOCARTA_VOBESITY_PATHWAY	8	312	1888	0.0445731	0.0377169	0.0255874	0.423865	0.955427
REACTOME_SODIUM_CALCIUM_EXCHANGERS	10	311	1889	0.0445593	0.151483	0.0437705	0.853373	0.955441
REACTOME_GAP_JUNCTION_ASSEMBLY	37	310	1890	0.0445035	0.128658	0.0648121	0.381907	0.955496
REACTOME_RUNX1_REGULATES_GENES_INVOLVED_IN_MEGAKARYOCYTE_DIFFERENTIATION_AND_PLATELET_FUNCTION	96	309	1891	0.0442208	0.64181	0.0984323	0.878527	0.955779
REACTOME_NOTCH3_INTRACELLULAR_DOMAIN_REGULATES_TRANSCRIPTION	25	308	1892	0.0441018	0.509484	0.0880046	0.889703	0.955898
REACTOME_CELL_CELL_JUNCTION_ORGANIZATION	59	307	1893	0.0440254	0.473868	0.00167525	0.275062	0.955975
BIOCARTA_LYM_PATHWAY	12	306	1894	0.0435469	0.0987162	0.0272629	0.389114	0.956453
REACTOME_CASPASE_ACTIVATION_VIA_EXTRINSIC_APOPTOTIC_SIGNALLING_PATHWAY	26	305	1895	0.0435098	0.421956	0.0460579	0.819858	0.95649
REACTOME_APOPTOSIS_INDUCED_DNA_FRAGMENTATION	13	304	1896	0.0432642	0.400362	0.070458	0.750333	0.956736
REACTOME_HYDROLYSIS_OF_LPC	9	303	1897	0.0425941	0.139685	0.0940929	0.641861	0.957406
REACTOME_INTERLEUKIN_9_SIGNALING	9	302	1898	0.0422579	0.518473	0.207171	0.473047	0.957742
REACTOME_DEPURINATION	55	301	1899	0.0419816	0.45601	0.112086	0.952747	0.958018
PID_GMCSF_PATHWAY	36	299	1900	0.0415033	0.311926	0.02922	0.943703	0.958497
PID_SYNDECAN_4_PATHWAY	32	300	1901	0.0415033	0.42411	0.0191261	0.827417	0.958497
BIOCARTA_NFKB_PATHWAY	21	298	1902	0.0407395	0.237606	0.0242388	0.814628	0.95926
REACTOME_MOLECULES_ASSOCIATED_WITH_ELASTIC_FIBRES	38	297	1903	0.0403593	0.324024	0.00327299	0.489323	0.959641
BIOCARTA_GLEEVEC_PATHWAY	23	295	1904	0.0397584	0.391766	0.0381192	0.864761	0.960242
PID_TCR_JNK_PATHWAY	14	296	1905	0.0397584	0.243413	0.128341	0.683775	0.960242
REACTOME_INTERLEUKIN_15_SIGNALING	14	294	1906	0.0388631	0.204985	0.119399	0.81303	0.961137
REACTOME_ANTIGEN_PRESENTATION:_FOLDING_ASSEMBLY_AND_PEPTIDE_LOADING_OF_CLASS_I_MHC	25	293	1907	0.0382424	0.213774	0.109379	0.698377	0.961758
PID_HES_HEY_PATHWAY	48	292	1908	0.0378958	0.490416	0.0780796	0.909864	0.962104
REACTOME_LECTIN_PATHWAY_OF_COMPLEMENT_ACTIVATION	8	291	1909	0.0378728	0.0651296	0.0758078	0.695058	0.962127
BIOCARTA_LECTIN_PATHWAY	12	290	1910	0.0378594	0.328233	0.0906422	0.682544	0.962141
SA_FAS_SIGNALING	9	289	1911	0.0377964	0.436796	0.106904	0.905364	0.962204
REACTOME_O2_CO2_EXCHANGE_IN_ERYTHROCYTES	13	288	1912	0.0372439	0.0536391	0.00324795	0.0933224	0.962756
REACTOME_ERYTHROPOIETIN_ACTIVATES_PHOSPHOINOSITIDE_3_KINASE_PI3K	12	287	1913	0.0371376	0.114934	0.117734	0.935298	0.962862
REACTOME_PROGRAMMED_CELL_DEATH	176	286	1914	0.0368262	0.867088	0.0435126	0.973163	0.963174
BIOCARTA_CDMAC_PATHWAY	16	285	1915	0.036649	0.142126	0.0199362	0.776506	0.963351
REACTOME_GP1B_IX_V_ACTIVATION_SIGNALLING	12	284	1916	0.0366221	0.262667	0.143522	0.823288	0.963378
BIOCARTA_EPONFKB_PATHWAY	11	283	1917	0.0360612	0.160222	0.215747	0.81748	0.963939
REACTOME_BETA_DEFENSINS	39	282	1918	0.0358137	0.210365	0.839679	0.842377	0.964186
BIOCARTA_TSP1_PATHWAY	7	281	1919	0.0357496	0.165542	0.0945053	0.818557	0.96425
REACTOME_GPCR_LIGAND_BINDING	440	280	1920	0.0351743	0.083271	0.00158775	0.237268	0.964826
KEGG_ENDOCYTOSIS	178	279	1921	0.0351137	0.730718	0.000174953	0.932807	0.964886
REACTOME_UB_SPECIFIC_PROCESSING_PROTEASES	217	278	1922	0.0348899	0.192168	0.0500277	0.978428	0.96511
BIOCARTA_TPO_PATHWAY	24	277	1923	0.0348062	0.177214	0.00387184	0.571778	0.965194
KEGG_TYPE_II_DIABETES_MELLITUS	47	276	1924	0.0347299	0.64093	0.0598975	0.906888	0.96527
BIOCARTA_NTHI_PATHWAY	22	275	1925	0.0346878	0.529582	0.0868726	0.913181	0.965312
REACTOME_SIGNAL_REGULATORY_PROTEIN_FAMILY_INTERACTIONS	15	274	1926	0.0340989	0.234108	0.0967238	0.539331	0.965901
BIOCARTA_MET_PATHWAY	33	273	1927	0.033062	0.424683	0.0424154	0.935431	0.966938
BIOCARTA_NKCELLS_PATHWAY	20	272	1928	0.0328482	0.33904	0.0628768	0.66231	0.967152
REACTOME_TRANSPORT_OF_INORGANIC_CATIONS_ANIONS_AND_AMINO_ACIDS_OLIGOPEPTIDES	105	271	1929	0.0320037	0.00721262	0.00154352	0.936403	0.967996
BIOCARTA_CCR5_PATHWAY	17	270	1930	0.0319494	0.522153	0.0054812	0.584325	0.968051
REACTOME_CD209_DC_SIGN_SIGNALING	21	269	1931	0.0317458	0.358389	0.130524	0.902709	0.968254
REACTOME_ACTIVATED_PKN1_STIMULATES_TRANSCRIPTION_OF_AR_ANDROGEN_RECEPTOR_REGULATED_GENES_KLK2_AND_KLK3	65	268	1932	0.0316952	0.217493	0.0871459	0.933634	0.968305
BIOCARTA_IL1R_PATHWAY	31	267	1933	0.0311076	0.0894966	0.0038859	0.591446	0.968892
BIOCARTA_GH_PATHWAY	27	266	1934	0.0310177	0.158799	0.0134824	0.728081	0.968982
BIOCARTA_STATHMIN_PATHWAY	20	265	1935	0.0309117	0.0692141	0.0428745	0.918391	0.969088
PID_TCR_CALCIUM_PATHWAY	28	264	1936	0.0308214	0.0609633	0.014412	0.830195	0.969179
REACTOME_TELOMERE_MAINTENANCE	81	263	1937	0.0306936	0.737079	0.0942282	0.947442	0.969306
PID_GLYPICAN_1PATHWAY	27	262	1938	0.0304105	0.0915642	0.010755	0.818814	0.969589
REACTOME_INTERLEUKIN_23_SIGNALING	9	261	1939	0.0300683	0.446419	0.151342	0.920652	0.969932
BIOCARTA_IL7_PATHWAY	16	260	1940	0.0298991	0.595	0.113631	0.943042	0.970101
KEGG_DILATED_CARDIOMYOPATHY	90	259	1941	0.0294508	0.355521	0.000892291	0.801137	0.970549
REACTOME_PLATELET_ACTIVATION_SIGNALING_AND_AGGREGATION	255	258	1942	0.0287964	0.0197341	0.00220803	0.71309	0.971204
REACTOME_ACTIVATION_OF_MATRIX_METALLOPROTEINASES	32	257	1943	0.0286924	0.478272	0.0701526	0.774972	0.971308
REACTOME_INTERLEUKIN_RECEPTOR_SHC_SIGNALING	27	256	1944	0.028437	0.0589046	0.0369881	0.533112	0.971563
REACTOME_DEUBIQUITINATION	290	255	1945	0.0281926	0.189732	0.050245	0.979676	0.971807
PID_INTEGRIN4_PATHWAY	11	254	1946	0.0279658	0.0724624	0.0555056	0.91425	0.972034
REACTOME_HSP90_CHAPERONE_CYCLE_FOR_STEROID_HORMONE_RECEPTORS_SHR	56	253	1947	0.0278366	0.317051	0.0854261	0.913721	0.972163
PID_RXR_VDR_PATHWAY	26	252	1948	0.0275394	0.0455302	0.00921084	0.459701	0.972461
REACTOME_INTERLEUKIN_18_SIGNALING	8	251	1949	0.0271755	0.0331271	0.105504	0.876054	0.972825
REACTOME_SLC_MEDIATED_TRANSMEMBRANE_TRANSPORT	248	250	1950	0.0271422	0.0456295	0.00144505	0.665472	0.972858
PID_REG_GR_PATHWAY	80	249	1951	0.0269357	0.420656	0.00880928	0.816633	0.973064
PID_TOLL_ENDOGENOUS_PATHWAY	24	248	1952	0.0267428	0.696936	0.0348248	0.392837	0.973257
KEGG_SMALL_CELL_LUNG_CANCER	84	247	1953	0.0264409	0.338068	0.00522777	0.987965	0.973559
REACTOME_NUCLEOTIDE_BINDING_DOMAIN_LEUCINE_RICH_REPEAT_CONTAINING_RECEPTOR_NLR_SIGNALING_PATHWAYS	54	246	1954	0.0262585	0.12006	0.041405	0.901843	0.973741
REACTOME_SIGNALING_BY_NOTCH	242	245	1955	0.0262502	0.580371	0.0503715	0.962407	0.97375
PID_AVB3_INTEGRIN_PATHWAY	73	244	1956	0.0262308	0.439378	0.0104707	0.910385	0.973769
REACTOME_C_TYPE_LECTIN_RECEPTORS_CLRS	139	243	1957	0.026218	0.341151	0.0456863	0.936834	0.973782
BIOCARTA_LYMPHOCYTE_PATHWAY	8	242	1958	0.0260098	0.122494	0.0350757	0.449351	0.97399
REACTOME_SIGNALING_BY_PDGF	58	241	1959	0.025914	0.348044	0.0171335	0.89798	0.974086
PID_CD40_PATHWAY	31	240	1960	0.0253752	0.167812	0.0273644	0.88109	0.974625
REACTOME_RUNX1_REGULATES_TRANSCRIPTION_OF_GENES_INVOLVED_IN_BCR_SIGNALING	6	239	1961	0.0253378	0.139753	0.0261096	0.213453	0.974662
PID_IFNG_PATHWAY	40	238	1962	0.025227	0.266015	0.0144598	0.948239	0.974773
PID_IL2_STAT5_PATHWAY	30	237	1963	0.0251505	0.0417956	0.00836978	0.754421	0.97485
REACTOME_PLATELET_AGGREGATION_PLUG_FORMATION	39	236	1964	0.0250232	0.103688	0.00849961	0.16841	0.974977
BIOCARTA_PCAF_PATHWAY	13	235	1965	0.0247999	0.220103	0.065512	0.94807	0.9752
PID_ANGIOPOIETIN_RECEPTOR_PATHWAY	49	234	1966	0.0246811	0.287621	0.0155146	0.919336	0.975319
REACTOME_REGULATION_BY_C_FLIP	11	233	1967	0.0246682	0.17607	0.0291927	0.642793	0.975332
KEGG_FC_EPSILON_RI_SIGNALING_PATHWAY	79	232	1968	0.0243866	0.0475124	0.000373191	0.935467	0.975613
BIOCARTA_NEUTROPHIL_PATHWAY	7	231	1969	0.0238557	0.109938	0.02732	0.449945	0.976144
REACTOME_INTERLEUKIN_2_SIGNALING	12	230	1970	0.0238459	0.100988	0.0107524	0.0753895	0.976154
KEGG_ARRHYTHMOGENIC_RIGHT_VENTRICULAR_CARDIOMYOPATHY_ARVC	74	229	1971	0.023823	0.486647	0.00590196	0.95463	0.976177
PID_FAS_PATHWAY	38	228	1972	0.023243	0.0844734	0.00799516	0.812937	0.976757
BIOCARTA_KERATINOCYTE_PATHWAY	46	227	1973	0.0231248	0.177536	0.00470886	0.853513	0.976875
REACTOME_INTERLEUKIN_27_SIGNALING	11	226	1974	0.022974	0.280127	0.0663251	0.71731	0.977026
BIOCARTA_IFNG_PATHWAY	6	225	1975	0.022936	0.149385	0.0381309	0.619892	0.977064
REACTOME_NCAM1_INTERACTIONS	42	224	1976	0.0228089	0.794508	0.0281163	0.47229	0.977191
REACTOME_REGULATION_OF_IFNA_SIGNALING	26	223	1977	0.0227892	0.0901465	0.394543	0.849064	0.977211
REACTOME_NUCLEOBASE_CATABOLISM	36	222	1978	0.0224723	0.57473	0.0592485	0.616938	0.977528
REACTOME_RUNX1_REGULATES_TRANSCRIPTION_OF_GENES_INVOLVED_IN_DIFFERENTIATION_OF_HSCS	127	221	1979	0.0224535	0.44327	0.0639714	0.937091	0.977546
PID_PDGFRB_PATHWAY	128	220	1980	0.0223054	0.227182	0.00794893	0.953463	0.977695
BIOCARTA_IL2_PATHWAY	22	219	1981	0.0210687	0.0729585	0.00169611	0.316782	0.978931
PID_LYMPH_ANGIOGENESIS_PATHWAY	24	218	1982	0.0210531	0.239691	0.0219322	0.848572	0.978947
PID_ATF2_PATHWAY	58	217	1983	0.0209059	0.0342657	0.00158198	0.711	0.979094
REACTOME_TOXICITY_OF_BOTULINUM_TOXIN_TYPE_D_BONT_D	5	216	1984	0.0207685	0.332608	0.0805978	0.657944	0.979231
REACTOME_REGULATION_OF_SIGNALING_BY_CBL	22	215	1985	0.0204852	0.264462	0.0465998	0.847406	0.979515
PID_INTEGRIN2_PATHWAY	28	214	1986	0.0202603	0.0454623	0.00154206	0.462778	0.97974
REACTOME_PEPTIDE_LIGAND_BINDING_RECEPTORS	184	213	1987	0.0200709	0.0373728	0.00121807	0.0568332	0.979929
BIOCARTA_ALTERNATIVE_PATHWAY	9	212	1988	0.0198117	0.131133	0.0308272	0.686214	0.980188
BIOCARTA_SPPA_PATHWAY	16	211	1989	0.0195397	0.0807695	0.00330044	0.60835	0.98046
REACTOME_SYNDECAN_INTERACTIONS	27	210	1990	0.0194773	0.02987	0.0413057	0.813301	0.980523
REACTOME_TRANSCRIPTIONAL_REGULATION_BY_RUNX1	236	209	1991	0.0192642	0.187161	0.0385247	0.990911	0.980736
BIOCARTA_CD40_PATHWAY	14	208	1992	0.0189712	0.365343	0.0444063	0.841712	0.981029
PID_P38_ALPHA_BETA_DOWNSTREAM_PATHWAY	38	207	1993	0.0189331	0.524563	0.0436118	0.971338	0.981067
REACTOME_RHO_GTPASES_ACTIVATE_PKNS	92	206	1994	0.018917	0.63204	0.0584352	0.892334	0.981083
REACTOME_DEFENSINS	48	205	1995	0.0187063	0.15452	0.69124	0.842179	0.981294
REACTOME_DECTIN_2_FAMILY	26	204	1996	0.0186866	0.200404	0.0451868	0.48139	0.981313
REACTOME_DIGESTION_OF_DIETARY_CARBOHYDRATE	11	203	1997	0.018671	0.16268	0.279051	0.831632	0.981329
REACTOME_INTERLEUKIN_21_SIGNALING	10	202	1998	0.0184593	0.397913	0.0876807	0.596858	0.981541
[truncated: 201 more rows]
